# Supplementary material for: In situLu–Hf geochronology with LA-ICP-MS/MS analysis
Source: Royal Society of Chemistry journal article supplement (doi:10.1039/d2ja00407k), 2023-01-01
Supplement: d2ja00407k1.xlsx [file d2ja00407k1.xlsx]

## Sheet: PlotDat6
Source sheet	Datas XN	0.2	514.795	1	508.022	13.919	73	484.353	15.5141	0.85	494.103
Plot name	Average2	246.8	514.795	2	509.535	16.7982	84	542.676	11.9354	1.15	494.103
Plot Type	15			3	498.569	17.4296	93	537.667	11.1695	1.15	521.941
1st free col	11			4	508.641	20.9094	99	491.312	11.5787	0.85	521.941
Sigma Level	2			5	508.266	16.0809	106	536.987	12.1236	0.85	494.103
Absolute Errs	TRUE			6	519.928	12.1615	145	490.884	13.8538	ErrBox	ErrBox
Symbol Type	1			7	515.743	22.2221	156	538.654	9.34632	1.85	492.737
Inverse Plot	FALSE			8	508.215	14.8948	166	538.739	9.62869	2.15	492.737
Color Plot	TRUE			9	510.869	15.4788	180	538.139	14.0704	2.15	526.333
3D plot	FALSE			10	528.774	15.2355	228	469.234	12.7748	1.85	526.333
Linear	FALSE			11	530.971	20.449	IsoLine	IsoLine	IsoLine	1.85	492.737
Data Range	FC2:FD267			12	531.493	16.0124				ErrBox	ErrBox
Filled Symbols	TRUE			13	498.993	13.4557				2.85	481.14
ConcAge	FALSE			14	519.134	10.6902				3.15	481.14
ConcSwap	FALSE			15	517.893	17.499				3.15	515.999
1st Symbol-row	1			16	512.173	14.7942				2.85	515.999
				17	523.746	16.776				2.85	481.14
				18	509.111	11.2366				ErrBox	ErrBox
				19	517.926	14.7579				3.85	487.732
				20	513.019	12.2797				4.15	487.732
				21	530.393	17.2262				4.15	529.551
				22	513.334	12.6926				3.85	529.551
				23	525.206	18.5557				3.85	487.732
				24	539.398	17.6147				ErrBox	ErrBox
				25	497.136	11.9647				4.85	492.186
				26	510.227	10.9151				5.15	492.186
				27	506.919	13.9172				5.15	524.347
				28	502.836	12.7901				4.85	524.347
				29	503.548	15.3424				4.85	492.186
				30	510.899	14.5414				ErrBox	ErrBox
				31	512.925	11.8512				5.85	507.766
				32	517.457	14.4988				6.15	507.766
				33	525.027	8.4244				6.15	532.089
				34	510.814	13.3568				5.85	532.089
				35	531.122	10.347				5.85	507.766
				36	533.16	14.5168				ErrBox	ErrBox
				37	511.69	16.4134				6.85	493.521
				38	504.004	17.7357				7.15	493.521
				39	508.449	12.2371				7.15	537.965
				40	513.25	17.4971				6.85	537.965
				41	536.532	14.5115				6.85	493.521
				42	505.139	14.4504				ErrBox	ErrBox
				43	504.401	19.0052				7.85	493.32
				44	522.661	17.5194				8.15	493.32
				45	509.542	12.3209				8.15	523.11
				46	516.997	12.6405				7.85	523.11
				47	526.525	17.235				7.85	493.32
				48	521.517	14.7469				ErrBox	ErrBox
				49	506.86	12.6256				8.85	495.391
				50	523.216	12.8295				9.15	495.391
				51	533.148	12.5115				9.15	526.348
				52	504.502	10.5904				8.85	526.348
				53	516.16	9.87209				8.85	495.391
				54	516.917	12.1187				ErrBox	ErrBox
				55	509.261	7.61208				9.85	513.538
				56	524.6	13.4267				10.15	513.538
				57	500.358	10.417				10.15	544.009
				58	517.355	7.99238				9.85	544.009
				59	514.295	10.7455				9.85	513.538
				60	529.841	12.1904				ErrBox	ErrBox
				61	512.761	12.3373				10.85	510.522
				62	532.865	15.1791				11.15	510.522
				63	502.691	16.1552				11.15	551.42
				64	510.723	13.7769				10.85	551.42
				65	521.939	13.8715				10.85	510.522
				66	505.263	15.6203				ErrBox	ErrBox
				67	522.224	12.7574				11.85	515.48
				68	514.988	15.1415				12.15	515.48
				69	505.776	12.1233				12.15	547.505
				70	517.856	10.1502				11.85	547.505
				71	511.873	14.7752				11.85	515.48
				72	514.927	11.3386				ErrBox	ErrBox
				74	520.229	13.7671				12.85	485.537
				75	533.362	12.2614				13.15	485.537
				76	503.936	8.08212				13.15	512.449
				77	510.284	13.1202				12.85	512.449
				78	519.899	12.254				12.85	485.537
				79	511.222	12.4754				ErrBox	ErrBox
				80	519.628	12.5671				13.85	508.443
				81	500.699	12.4931				14.15	508.443
				82	508.915	11.0102				14.15	529.824
				83	524.636	13.1033				13.85	529.824
				85	510.821	14.7926				13.85	508.443
				86	517.722	13.4178				ErrBox	ErrBox
				87	496.162	10.0339				14.85	500.394
				88	499.158	11.2885				15.15	500.394
				89	530.002	11.6338				15.15	535.392
				90	510.682	12.487				14.85	535.392
				91	532.283	12.8885				14.85	500.394
				92	511.529	11.8714				ErrBox	ErrBox
				94	509.048	10.4157				15.85	497.379
				95	511.645	13.3827				16.15	497.379
				96	523.681	11.9048				16.15	526.968
				97	510.508	11.3107				15.85	526.968
				98	505.372	11.6769				15.85	497.379
				100	518.626	12.4443				ErrBox	ErrBox
				101	528.698	12.1288				16.85	506.97
				102	508.623	14.9306				17.15	506.97
				103	527.716	12.4262				17.15	540.522
				104	508.871	16.0212				16.85	540.522
				105	523.502	11.4117				16.85	506.97
				107	512.873	13.8128				ErrBox	ErrBox
				108	508.015	9.9534				17.85	497.875
				109	500.607	12.1459				18.15	497.875
				110	510.662	15.07				18.15	520.348
				111	501.022	15.3353				17.85	520.348
				112	519.93	15.014				17.85	497.875
				113	515.207	13.6484				ErrBox	ErrBox
				114	509.343	11.6839				18.85	503.168
				115	518.424	12.7179				19.15	503.168
				116	521.396	13.3435				19.15	532.684
				117	528.209	14.2994				18.85	532.684
				118	514.75	15.2054				18.85	503.168
				119	519.713	16.9104				ErrBox	ErrBox
				120	524.748	12.9093				19.85	500.739
				121	520.335	12.8692				20.15	500.739
				122	514.907	15.5002				20.15	525.299
				123	513.077	14.6548				19.85	525.299
				124	529.076	13.719				19.85	500.739
				125	516.832	13.4309				ErrBox	ErrBox
				126	503.048	14.6784				20.85	513.167
				127	520.748	15.4587				21.15	513.167
				128	521.631	14.503				21.15	547.62
				129	501.89	13.1826				20.85	547.62
				130	504.577	16.4542				20.85	513.167
				131	511.31	15.1566				ErrBox	ErrBox
				132	518.915	13.0076				21.85	500.642
				133	506.945	12.6277				22.15	500.642
				134	523.304	12.8317				22.15	526.027
				135	533.237	12.5136				21.85	526.027
				136	504.587	10.5922				21.85	500.642
				137	516.247	9.87375				ErrBox	ErrBox
				138	516.921	12.1187				22.85	506.651
				139	509.262	7.6132				23.15	506.651
				140	524.604	13.4266				23.15	543.762
				141	500.359	10.4169				22.85	543.762
				142	517.274	7.9934				22.85	506.651
				143	514.382	10.7474				ErrBox	ErrBox
				144	529.93	12.1925				23.85	521.784
				146	503.195	14.5422				24.15	521.784
				147	509.054	11.7547				24.15	557.013
				148	513.183	12.8636				23.85	557.013
				149	500.007	9.57605				23.85	521.784
				150	520.169	12.0011				ErrBox	ErrBox
				151	527.634	9.80261				24.85	485.171
				152	501.972	8.60426				25.15	485.171
				153	525.467	13.3834				25.15	509.101
				154	506.13	11.0951				24.85	509.101
				155	532.384	11.158				24.85	485.171
				157	518.358	12.1388				ErrBox	ErrBox
				158	505.436	9.30842				25.85	499.312
				159	506.84	11.36				26.15	499.312
				160	522.867	12.7749				26.15	521.142
				161	515.917	11.6545				25.85	521.142
				162	513.731	13.4079				25.85	499.312
				163	531.207	10.98				ErrBox	ErrBox
				164	508.717	13.7411				26.85	493.002
				165	509.309	11.3102				27.15	493.002
				167	524.704	11.4532				27.15	520.836
				168	512.353	9.87755				26.85	520.836
				169	497.151	14.55				26.85	493.002
				170	503.614	11.8467				ErrBox	ErrBox
				171	503.82	15.2672				27.85	490.046
				172	502.446	11.5294				28.15	490.046
				173	515.307	15.2437				28.15	515.626
				174	517.679	12.3202				27.85	515.626
				175	520.34	10.1876				27.85	490.046
				176	513.36	13.3592				ErrBox	ErrBox
				177	520.741	12.9498				28.85	488.206
				178	529.852	11.671				29.15	488.206
				179	513.138	12.5838				29.15	518.89
				181	519.075	13.868				28.85	518.89
				182	512.484	12.7635				28.85	488.206
				183	507.114	13.7144				ErrBox	ErrBox
				184	516.12	12.2138				29.85	496.357
				185	512.181	12.3018				30.15	496.357
				186	516.277	12.4281				30.15	525.44
				187	513.94	13.9258				29.85	525.44
				188	514.671	9.82599				29.85	496.357
				189	524.607	9.96231				ErrBox	ErrBox
				190	527.428	11.5416				30.85	501.073
				191	501.007	8.91942				31.15	501.073
				192	515.574	9.89709				31.15	524.776
				193	501.857	12.9237				30.85	524.776
				194	521.291	14.4575				30.85	501.073
				195	497.789	17.7957				ErrBox	ErrBox
				196	516.547	10.9023				31.85	502.958
				197	505.574	13.1561				32.15	502.958
				198	531.609	13.2807				32.15	531.955
				199	536.497	17.3472				31.85	531.955
				200	498.05	13.1902				31.85	502.958
				201	515.624	15.167				ErrBox	ErrBox
				202	535.489	14.7937				32.85	516.602
				203	500.518	14.8322				33.15	516.602
				204	516.802	14.9312				33.15	533.451
				205	505.57	11.8541				32.85	533.451
				206	521.374	12.1984				32.85	516.602
				207	523.647	12.6144				ErrBox	ErrBox
				208	497.792	15.5996				33.85	497.457
				209	530.06	13.464				34.15	497.457
				210	526.556	11.2033				34.15	524.171
				211	503.956	12.3802				33.85	524.171
				212	514.182	11.3417				33.85	497.457
				213	511.179	17.0485				ErrBox	ErrBox
				214	523.453	17.8964				34.85	520.775
				215	499.295	19.2018				35.15	520.775
				216	520.94	21.1219				35.15	541.469
				217	501.665	13.9848				34.85	541.469
				218	513.435	14.5014				34.85	520.775
				219	523.009	16.869				ErrBox	ErrBox
				220	522.24	15.4948				35.85	518.643
				221	520.527	15.4063				36.15	518.643
				222	517.326	16.1145				36.15	547.677
				223	514.961	12.793				35.85	547.677
				224	517.143	16.1395				35.85	518.643
				225	519.737	11.5168				ErrBox	ErrBox
				226	508.409	15.6204				36.85	495.277
				227	527.229	12.1012				37.15	495.277
				229	501.02	15.9933				37.15	528.104
				230	526.408	15.0327				36.85	528.104
				231	502.824	13.303				36.85	495.277
				232	515.153	12.1359				ErrBox	ErrBox
				233	517.88	15.0686				37.85	486.268
				234	508.269	15.0725				38.15	486.268
				235	533.751	13.2584				38.15	521.74
				236	524.993	16.6256				37.85	521.74
				237	497.442	14.7109				37.85	486.268
				238	505.343	13.6503				ErrBox	ErrBox
				239	519.586	13.1424				38.85	496.212
				240	496.744	16.0445				39.15	496.212
				241	526.95	16.2746				39.15	520.686
				242	528.413	15.0744				38.85	520.686
				243	512.975	10.8698				38.85	496.212
				244	524.248	14.4058				ErrBox	ErrBox
				245	518.516	14.3396				39.85	495.753
				246	523.585	16.5407				40.15	495.753
				IsoLine	IsoLine	IsoLine	IsoLine			40.15	530.747
										39.85	530.747
										39.85	495.753
										ErrBox	ErrBox
										40.85	522.02
										41.15	522.02
										41.15	551.043
										40.85	551.043
										40.85	522.02
										ErrBox	ErrBox
										41.85	490.689
										42.15	490.689
										42.15	519.589
										41.85	519.589
										41.85	490.689
										ErrBox	ErrBox
										42.85	485.396
										43.15	485.396
										43.15	523.407
										42.85	523.407
										42.85	485.396
										ErrBox	ErrBox
										43.85	505.142
										44.15	505.142
										44.15	540.181
										43.85	540.181
										43.85	505.142
										ErrBox	ErrBox
										44.85	497.221
										45.15	497.221
										45.15	521.863
										44.85	521.863
										44.85	497.221
										ErrBox	ErrBox
										45.85	504.357
										46.15	504.357
										46.15	529.638
										45.85	529.638
										45.85	504.357
										ErrBox	ErrBox
										46.85	509.29
										47.15	509.29
										47.15	543.76
										46.85	543.76
										46.85	509.29
										ErrBox	ErrBox
										47.85	506.77
										48.15	506.77
										48.15	536.264
										47.85	536.264
										47.85	506.77
										ErrBox	ErrBox
										48.85	494.235
										49.15	494.235
										49.15	519.486
										48.85	519.486
										48.85	494.235
										ErrBox	ErrBox
										49.85	510.387
										50.15	510.387
										50.15	536.046
										49.85	536.046
										49.85	510.387
										ErrBox	ErrBox
										50.85	520.636
										51.15	520.636
										51.15	545.659
										50.85	545.659
										50.85	520.636
										ErrBox	ErrBox
										51.85	493.911
										52.15	493.911
										52.15	515.092
										51.85	515.092
										51.85	493.911
										ErrBox	ErrBox
										52.85	506.288
										53.15	506.288
										53.15	526.032
										52.85	526.032
										52.85	506.288
										ErrBox	ErrBox
										53.85	504.799
										54.15	504.799
										54.15	529.036
										53.85	529.036
										53.85	504.799
										ErrBox	ErrBox
										54.85	501.648
										55.15	501.648
										55.15	516.873
										54.85	516.873
										54.85	501.648
										ErrBox	ErrBox
										55.85	511.173
										56.15	511.173
										56.15	538.026
										55.85	538.026
										55.85	511.173
										ErrBox	ErrBox
										56.85	489.941
										57.15	489.941
										57.15	510.775
										56.85	510.775
										56.85	489.941
										ErrBox	ErrBox
										57.85	509.362
										58.15	509.362
										58.15	525.347
										57.85	525.347
										57.85	509.362
										ErrBox	ErrBox
										58.85	503.55
										59.15	503.55
										59.15	525.041
										58.85	525.041
										58.85	503.55
										ErrBox	ErrBox
										59.85	517.651
										60.15	517.651
										60.15	542.031
										59.85	542.031
										59.85	517.651
										ErrBox	ErrBox
										60.85	500.423
										61.15	500.423
										61.15	525.098
										60.85	525.098
										60.85	500.423
										ErrBox	ErrBox
										61.85	517.686
										62.15	517.686
										62.15	548.044
										61.85	548.044
										61.85	517.686
										ErrBox	ErrBox
										62.85	486.536
										63.15	486.536
										63.15	518.846
										62.85	518.846
										62.85	486.536
										ErrBox	ErrBox
										63.85	496.946
										64.15	496.946
										64.15	524.5
										63.85	524.5
										63.85	496.946
										ErrBox	ErrBox
										64.85	508.067
										65.15	508.067
										65.15	535.81
										64.85	535.81
										64.85	508.067
										ErrBox	ErrBox
										65.85	489.643
										66.15	489.643
										66.15	520.883
										65.85	520.883
										65.85	489.643
										ErrBox	ErrBox
										66.85	509.467
										67.15	509.467
										67.15	534.982
										66.85	534.982
										66.85	509.467
										ErrBox	ErrBox
										67.85	499.847
										68.15	499.847
										68.15	530.13
										67.85	530.13
										67.85	499.847
										ErrBox	ErrBox
										68.85	493.653
										69.15	493.653
										69.15	517.899
										68.85	517.899
										68.85	493.653
										ErrBox	ErrBox
										69.85	507.706
										70.15	507.706
										70.15	528.006
										69.85	528.006
										69.85	507.706
										ErrBox	ErrBox
										70.85	497.098
										71.15	497.098
										71.15	526.649
										70.85	526.649
										70.85	497.098
										ErrBox	ErrBox
										71.85	503.588
										72.15	503.588
										72.15	526.265
										71.85	526.265
										71.85	503.588
										ErrBox	ErrBox
										73.85	506.462
										74.15	506.462
										74.15	533.997
										73.85	533.997
										73.85	506.462
										ErrBox	ErrBox
										74.85	521.101
										75.15	521.101
										75.15	545.623
										74.85	545.623
										74.85	521.101
										ErrBox	ErrBox
										75.85	495.854
										76.15	495.854
										76.15	512.018
										75.85	512.018
										75.85	495.854
										ErrBox	ErrBox
										76.85	497.164
										77.15	497.164
										77.15	523.404
										76.85	523.404
										76.85	497.164
										ErrBox	ErrBox
										77.85	507.645
										78.15	507.645
										78.15	532.153
										77.85	532.153
										77.85	507.645
										ErrBox	ErrBox
										78.85	498.747
										79.15	498.747
										79.15	523.698
										78.85	523.698
										78.85	498.747
										ErrBox	ErrBox
										79.85	507.061
										80.15	507.061
										80.15	532.195
										79.85	532.195
										79.85	507.061
										ErrBox	ErrBox
										80.85	488.206
										81.15	488.206
										81.15	513.193
										80.85	513.193
										80.85	488.206
										ErrBox	ErrBox
										81.85	497.905
										82.15	497.905
										82.15	519.925
										81.85	519.925
										81.85	497.905
										ErrBox	ErrBox
										82.85	511.533
										83.15	511.533
										83.15	537.74
										82.85	537.74
										82.85	511.533
										ErrBox	ErrBox
										84.85	496.028
										85.15	496.028
										85.15	525.613
										84.85	525.613
										84.85	496.028
										ErrBox	ErrBox
										85.85	504.304
										86.15	504.304
										86.15	531.14
										85.85	531.14
										85.85	504.304
										ErrBox	ErrBox
										86.85	486.128
										87.15	486.128
										87.15	506.196
										86.85	506.196
										86.85	486.128
										ErrBox	ErrBox
										87.85	487.869
										88.15	487.869
										88.15	510.446
										87.85	510.446
										87.85	487.869
										ErrBox	ErrBox
										88.85	518.368
										89.15	518.368
										89.15	541.636
										88.85	541.636
										88.85	518.368
										ErrBox	ErrBox
										89.85	498.195
										90.15	498.195
										90.15	523.169
										89.85	523.169
										89.85	498.195
										ErrBox	ErrBox
										90.85	519.394
										91.15	519.394
										91.15	545.171
										90.85	545.171
										90.85	519.394
										ErrBox	ErrBox
										91.85	499.657
										92.15	499.657
										92.15	523.4
										91.85	523.4
										91.85	499.657
										ErrBox	ErrBox
										93.85	498.632
										94.15	498.632
										94.15	519.464
										93.85	519.464
										93.85	498.632
										ErrBox	ErrBox
										94.85	498.262
										95.15	498.262
										95.15	525.028
										94.85	525.028
										94.85	498.262
										ErrBox	ErrBox
										95.85	511.776
										96.15	511.776
										96.15	535.586
										95.85	535.586
										95.85	511.776
										ErrBox	ErrBox
										96.85	499.197
										97.15	499.197
										97.15	521.818
										96.85	521.818
										96.85	499.197
										ErrBox	ErrBox
										97.85	493.696
										98.15	493.696
										98.15	517.049
										97.85	517.049
										97.85	493.696
										ErrBox	ErrBox
										99.85	506.181
										100.15	506.181
										100.15	531.07
										99.85	531.07
										99.85	506.181
										ErrBox	ErrBox
										100.85	516.569
										101.15	516.569
										101.15	540.827
										100.85	540.827
										100.85	516.569
										ErrBox	ErrBox
										101.85	493.692
										102.15	493.692
										102.15	523.553
										101.85	523.553
										101.85	493.692
										ErrBox	ErrBox
										102.85	515.29
										103.15	515.29
										103.15	540.142
										102.85	540.142
										102.85	515.29
										ErrBox	ErrBox
										103.85	492.85
										104.15	492.85
										104.15	524.892
										103.85	524.892
										103.85	492.85
										ErrBox	ErrBox
										104.85	512.09
										105.15	512.09
										105.15	534.914
										104.85	534.914
										104.85	512.09
										ErrBox	ErrBox
										106.85	499.061
										107.15	499.061
										107.15	526.686
										106.85	526.686
										106.85	499.061
										ErrBox	ErrBox
										107.85	498.061
										108.15	498.061
										108.15	517.968
										107.85	517.968
										107.85	498.061
										ErrBox	ErrBox
										108.85	488.461
										109.15	488.461
										109.15	512.753
										108.85	512.753
										108.85	488.461
										ErrBox	ErrBox
										109.85	495.592
										110.15	495.592
										110.15	525.732
										109.85	525.732
										109.85	495.592
										ErrBox	ErrBox
										110.85	485.687
										111.15	485.687
										111.15	516.357
										110.85	516.357
										110.85	485.687
										ErrBox	ErrBox
										111.85	504.916
										112.15	504.916
										112.15	534.944
										111.85	534.944
										111.85	504.916
										ErrBox	ErrBox
										112.85	501.559
										113.15	501.559
										113.15	528.855
										112.85	528.855
										112.85	501.559
										ErrBox	ErrBox
										113.85	497.659
										114.15	497.659
										114.15	521.027
										113.85	521.027
										113.85	497.659
										ErrBox	ErrBox
										114.85	505.706
										115.15	505.706
										115.15	531.142
										114.85	531.142
										114.85	505.706
										ErrBox	ErrBox
										115.85	508.052
										116.15	508.052
										116.15	534.739
										115.85	534.739
										115.85	508.052
										ErrBox	ErrBox
										116.85	513.91
										117.15	513.91
										117.15	542.509
										116.85	542.509
										116.85	513.91
										ErrBox	ErrBox
										117.85	499.545
										118.15	499.545
										118.15	529.955
										117.85	529.955
										117.85	499.545
										ErrBox	ErrBox
										118.85	502.802
										119.15	502.802
										119.15	536.623
										118.85	536.623
										118.85	502.802
										ErrBox	ErrBox
										119.85	511.839
										120.15	511.839
										120.15	537.657
										119.85	537.657
										119.85	511.839
										ErrBox	ErrBox
										120.85	507.466
										121.15	507.466
										121.15	533.205
										120.85	533.205
										120.85	507.466
										ErrBox	ErrBox
										121.85	499.407
										122.15	499.407
										122.15	530.407
										121.85	530.407
										121.85	499.407
										ErrBox	ErrBox
										122.85	498.422
										123.15	498.422
										123.15	527.732
										122.85	527.732
										122.85	498.422
										ErrBox	ErrBox
										123.85	515.357
										124.15	515.357
										124.15	542.795
										123.85	542.795
										123.85	515.357
										ErrBox	ErrBox
										124.85	503.401
										125.15	503.401
										125.15	530.263
										124.85	530.263
										124.85	503.401
										ErrBox	ErrBox
										125.85	488.37
										126.15	488.37
										126.15	517.726
										125.85	517.726
										125.85	488.37
										ErrBox	ErrBox
										126.85	505.29
										127.15	505.29
										127.15	536.207
										126.85	536.207
										126.85	505.29
										ErrBox	ErrBox
										127.85	507.127
										128.15	507.127
										128.15	536.134
										127.85	536.134
										127.85	507.127
										ErrBox	ErrBox
										128.85	488.707
										129.15	488.707
										129.15	515.072
										128.85	515.072
										128.85	488.707
										ErrBox	ErrBox
										129.85	488.123
										130.15	488.123
										130.15	521.032
										129.85	521.032
										129.85	488.123
										ErrBox	ErrBox
										130.85	496.153
										131.15	496.153
										131.15	526.466
										130.85	526.466
										130.85	496.153
										ErrBox	ErrBox
										131.85	505.907
										132.15	505.907
										132.15	531.922
										131.85	531.922
										131.85	505.907
										ErrBox	ErrBox
										132.85	494.318
										133.15	494.318
										133.15	519.573
										132.85	519.573
										132.85	494.318
										ErrBox	ErrBox
										133.85	510.473
										134.15	510.473
										134.15	536.136
										133.85	536.136
										133.85	510.473
										ErrBox	ErrBox
										134.85	520.724
										135.15	520.724
										135.15	545.751
										134.85	545.751
										134.85	520.724
										ErrBox	ErrBox
										135.85	493.995
										136.15	493.995
										136.15	515.179
										135.85	515.179
										135.85	493.995
										ErrBox	ErrBox
										136.85	506.373
										137.15	506.373
										137.15	526.121
										136.85	526.121
										136.85	506.373
										ErrBox	ErrBox
										137.85	504.802
										138.15	504.802
										138.15	529.039
										137.85	529.039
										137.85	504.802
										ErrBox	ErrBox
										138.85	501.649
										139.15	501.649
										139.15	516.875
										138.85	516.875
										138.85	501.649
										ErrBox	ErrBox
										139.85	511.178
										140.15	511.178
										140.15	538.031
										139.85	538.031
										139.85	511.178
										ErrBox	ErrBox
										140.85	489.942
										141.15	489.942
										141.15	510.776
										140.85	510.776
										140.85	489.942
										ErrBox	ErrBox
										141.85	509.281
										142.15	509.281
										142.15	525.267
										141.85	525.267
										141.85	509.281
										ErrBox	ErrBox
										142.85	503.634
										143.15	503.634
										143.15	525.129
										142.85	525.129
										142.85	503.634
										ErrBox	ErrBox
										143.85	517.738
										144.15	517.738
										144.15	542.123
										143.85	542.123
										143.85	517.738
										ErrBox	ErrBox
										145.85	488.653
										146.15	488.653
										146.15	517.738
										145.85	517.738
										145.85	488.653
										ErrBox	ErrBox
										146.85	497.299
										147.15	497.299
										147.15	520.808
										146.85	520.808
										146.85	497.299
										ErrBox	ErrBox
										147.85	500.32
										148.15	500.32
										148.15	526.047
										147.85	526.047
										147.85	500.32
										ErrBox	ErrBox
										148.85	490.431
										149.15	490.431
										149.15	509.583
										148.85	509.583
										148.85	490.431
										ErrBox	ErrBox
										149.85	508.168
										150.15	508.168
										150.15	532.17
										149.85	532.17
										149.85	508.168
										ErrBox	ErrBox
										150.85	517.832
										151.15	517.832
										151.15	537.437
										150.85	537.437
										150.85	517.832
										ErrBox	ErrBox
										151.85	493.368
										152.15	493.368
										152.15	510.576
										151.85	510.576
										151.85	493.368
										ErrBox	ErrBox
										152.85	512.083
										153.15	512.083
										153.15	538.85
										152.85	538.85
										152.85	512.083
										ErrBox	ErrBox
										153.85	495.035
										154.15	495.035
										154.15	517.225
										153.85	517.225
										153.85	495.035
										ErrBox	ErrBox
										154.85	521.227
										155.15	521.227
										155.15	543.542
										154.85	543.542
										154.85	521.227
										ErrBox	ErrBox
										156.85	506.219
										157.15	506.219
										157.15	530.497
										156.85	530.497
										156.85	506.219
										ErrBox	ErrBox
										157.85	496.128
										158.15	496.128
										158.15	514.745
										157.85	514.745
										157.85	496.128
										ErrBox	ErrBox
										158.85	495.481
										159.15	495.481
										159.15	518.2
										158.85	518.2
										158.85	495.481
										ErrBox	ErrBox
										159.85	510.092
										160.15	510.092
										160.15	535.642
										159.85	535.642
										159.85	510.092
										ErrBox	ErrBox
										160.85	504.262
										161.15	504.262
										161.15	527.571
										160.85	527.571
										160.85	504.262
										ErrBox	ErrBox
										161.85	500.323
										162.15	500.323
										162.15	527.139
										161.85	527.139
										161.85	500.323
										ErrBox	ErrBox
										162.85	520.227
										163.15	520.227
										163.15	542.187
										162.85	542.187
										162.85	520.227
										ErrBox	ErrBox
										163.85	494.976
										164.15	494.976
										164.15	522.458
										163.85	522.458
										163.85	494.976
										ErrBox	ErrBox
										164.85	497.999
										165.15	497.999
										165.15	520.619
										164.85	520.619
										164.85	497.999
										ErrBox	ErrBox
										166.85	513.251
										167.15	513.251
										167.15	536.157
										166.85	536.157
										166.85	513.251
										ErrBox	ErrBox
										167.85	502.475
										168.15	502.475
										168.15	522.23
										167.85	522.23
										167.85	502.475
										ErrBox	ErrBox
										168.85	482.601
										169.15	482.601
										169.15	511.701
										168.85	511.701
										168.85	482.601
										ErrBox	ErrBox
										169.85	491.768
										170.15	491.768
										170.15	515.461
										169.85	515.461
										169.85	491.768
										ErrBox	ErrBox
										170.85	488.553
										171.15	488.553
										171.15	519.087
										170.85	519.087
										170.85	488.553
										ErrBox	ErrBox
										171.85	490.917
										172.15	490.917
										172.15	513.976
										171.85	513.976
										171.85	490.917
										ErrBox	ErrBox
										172.85	500.063
										173.15	500.063
										173.15	530.551
										172.85	530.551
										172.85	500.063
										ErrBox	ErrBox
										173.85	505.359
										174.15	505.359
										174.15	529.999
										173.85	529.999
										173.85	505.359
										ErrBox	ErrBox
										174.85	510.153
										175.15	510.153
										175.15	530.528
										174.85	530.528
										174.85	510.153
										ErrBox	ErrBox
										175.85	500.001
										176.15	500.001
										176.15	526.719
										175.85	526.719
										175.85	500.001
										ErrBox	ErrBox
										176.85	507.791
										177.15	507.791
										177.15	533.69
										176.85	533.69
										176.85	507.791
										ErrBox	ErrBox
										177.85	518.181
										178.15	518.181
										178.15	541.523
										177.85	541.523
										177.85	518.181
										ErrBox	ErrBox
										178.85	500.555
										179.15	500.555
										179.15	525.722
										178.85	525.722
										178.85	500.555
										ErrBox	ErrBox
										180.85	505.207
										181.15	505.207
										181.15	532.943
										180.85	532.943
										180.85	505.207
										ErrBox	ErrBox
										181.85	499.72
										182.15	499.72
										182.15	525.247
										181.85	525.247
										181.85	499.72
										ErrBox	ErrBox
										182.85	493.399
										183.15	493.399
										183.15	520.828
										182.85	520.828
										182.85	493.399
										ErrBox	ErrBox
										183.85	503.907
										184.15	503.907
										184.15	528.334
										183.85	528.334
										183.85	503.907
										ErrBox	ErrBox
										184.85	499.879
										185.15	499.879
										185.15	524.483
										184.85	524.483
										184.85	499.879
										ErrBox	ErrBox
										185.85	503.849
										186.15	503.849
										186.15	528.705
										185.85	528.705
										185.85	503.849
										ErrBox	ErrBox
										186.85	500.014
										187.15	500.014
										187.15	527.866
										186.85	527.866
										186.85	500.014
										ErrBox	ErrBox
										187.85	504.845
										188.15	504.845
										188.15	524.497
										187.85	524.497
										187.85	504.845
										ErrBox	ErrBox
										188.85	514.644
										189.15	514.644
										189.15	534.569
										188.85	534.569
										188.85	514.644
										ErrBox	ErrBox
										189.85	515.887
										190.15	515.887
										190.15	538.97
										189.85	538.97
										189.85	515.887
										ErrBox	ErrBox
										190.85	492.088
										191.15	492.088
										191.15	509.926
										190.85	509.926
										190.85	492.088
										ErrBox	ErrBox
										191.85	505.677
										192.15	505.677
										192.15	525.471
										191.85	525.471
										191.85	505.677
										ErrBox	ErrBox
										192.85	488.933
										193.15	488.933
										193.15	514.781
										192.85	514.781
										192.85	488.933
										ErrBox	ErrBox
										193.85	506.834
										194.15	506.834
										194.15	535.749
										193.85	535.749
										193.85	506.834
										ErrBox	ErrBox
										194.85	479.993
										195.15	479.993
										195.15	515.584
										194.85	515.584
										194.85	479.993
										ErrBox	ErrBox
										195.85	505.645
										196.15	505.645
										196.15	527.45
										195.85	527.45
										195.85	505.645
										ErrBox	ErrBox
										196.85	492.418
										197.15	492.418
										197.15	518.73
										196.85	518.73
										196.85	492.418
										ErrBox	ErrBox
										197.85	518.328
										198.15	518.328
										198.15	544.89
										197.85	544.89
										197.85	518.328
										ErrBox	ErrBox
										198.85	519.149
										199.15	519.149
										199.15	553.844
										198.85	553.844
										198.85	519.149
										ErrBox	ErrBox
										199.85	484.86
										200.15	484.86
										200.15	511.24
										199.85	511.24
										199.85	484.86
										ErrBox	ErrBox
										200.85	500.457
										201.15	500.457
										201.15	530.791
										200.85	530.791
										200.85	500.457
										ErrBox	ErrBox
										201.85	520.696
										202.15	520.696
										202.15	550.283
										201.85	550.283
										201.85	520.696
										ErrBox	ErrBox
										202.85	485.686
										203.15	485.686
										203.15	515.35
										202.85	515.35
										202.85	485.686
										ErrBox	ErrBox
										203.85	501.871
										204.15	501.871
										204.15	531.733
										203.85	531.733
										203.85	501.871
										ErrBox	ErrBox
										204.85	493.716
										205.15	493.716
										205.15	517.424
										204.85	517.424
										204.85	493.716
										ErrBox	ErrBox
										205.85	509.175
										206.15	509.175
										206.15	533.572
										205.85	533.572
										205.85	509.175
										ErrBox	ErrBox
										206.85	511.032
										207.15	511.032
										207.15	536.261
										206.85	536.261
										206.85	511.032
										ErrBox	ErrBox
										207.85	482.192
										208.15	482.192
										208.15	513.392
										207.85	513.392
										207.85	482.192
										ErrBox	ErrBox
										208.85	516.596
										209.15	516.596
										209.15	543.524
										208.85	543.524
										208.85	516.596
										ErrBox	ErrBox
										209.85	515.353
										210.15	515.353
										210.15	537.76
										209.85	537.76
										209.85	515.353
										ErrBox	ErrBox
										210.85	491.575
										211.15	491.575
										211.15	516.336
										210.85	516.336
										210.85	491.575
										ErrBox	ErrBox
										211.85	502.84
										212.15	502.84
										212.15	525.524
										211.85	525.524
										211.85	502.84
										ErrBox	ErrBox
										212.85	494.13
										213.15	494.13
										213.15	528.227
										212.85	528.227
										212.85	494.13
										ErrBox	ErrBox
										213.85	505.556
										214.15	505.556
										214.15	541.349
										213.85	541.349
										213.85	505.556
										ErrBox	ErrBox
										214.85	480.093
										215.15	480.093
										215.15	518.497
										214.85	518.497
										214.85	480.093
										ErrBox	ErrBox
										215.85	499.819
										216.15	499.819
										216.15	542.062
										215.85	542.062
										215.85	499.819
										ErrBox	ErrBox
										216.85	487.68
										217.15	487.68
										217.15	515.649
										216.85	515.649
										216.85	487.68
										ErrBox	ErrBox
										217.85	498.933
										218.15	498.933
										218.15	527.936
										217.85	527.936
										217.85	498.933
										ErrBox	ErrBox
										218.85	506.14
										219.15	506.14
										219.15	539.878
										218.85	539.878
										218.85	506.14
										ErrBox	ErrBox
										219.85	506.745
										220.15	506.745
										220.15	537.734
										219.85	537.734
										219.85	506.745
										ErrBox	ErrBox
										220.85	505.121
										221.15	505.121
										221.15	535.934
										220.85	535.934
										220.85	505.121
										ErrBox	ErrBox
										221.85	501.211
										222.15	501.211
										222.15	533.44
										221.85	533.44
										221.85	501.211
										ErrBox	ErrBox
										222.85	502.168
										223.15	502.168
										223.15	527.754
										222.85	527.754
										222.85	502.168
										ErrBox	ErrBox
										223.85	501.003
										224.15	501.003
										224.15	533.282
										223.85	533.282
										223.85	501.003
										ErrBox	ErrBox
										224.85	508.22
										225.15	508.22
										225.15	531.254
										224.85	531.254
										224.85	508.22
										ErrBox	ErrBox
										225.85	492.788
										226.15	492.788
										226.15	524.029
										225.85	524.029
										225.85	492.788
										ErrBox	ErrBox
										226.85	515.128
										227.15	515.128
										227.15	539.33
										226.85	539.33
										226.85	515.128
										ErrBox	ErrBox
										228.85	485.027
										229.15	485.027
										229.15	517.014
										228.85	517.014
										228.85	485.027
										ErrBox	ErrBox
										229.85	511.375
										230.15	511.375
										230.15	541.441
										229.85	541.441
										229.85	511.375
										ErrBox	ErrBox
										230.85	489.521
										231.15	489.521
										231.15	516.127
										230.85	516.127
										230.85	489.521
										ErrBox	ErrBox
										231.85	503.017
										232.15	503.017
										232.15	527.289
										231.85	527.289
										231.85	503.017
										ErrBox	ErrBox
										232.85	502.811
										233.15	502.811
										233.15	532.949
										232.85	532.949
										232.85	502.811
										ErrBox	ErrBox
										233.85	493.196
										234.15	493.196
										234.15	523.341
										233.85	523.341
										233.85	493.196
										ErrBox	ErrBox
										234.85	520.493
										235.15	520.493
										235.15	547.01
										234.85	547.01
										234.85	520.493
										ErrBox	ErrBox
										235.85	508.367
										236.15	508.367
										236.15	541.618
										235.85	541.618
										235.85	508.367
										ErrBox	ErrBox
										236.85	482.731
										237.15	482.731
										237.15	512.153
										236.85	512.153
										236.85	482.731
										ErrBox	ErrBox
										237.85	491.692
										238.15	491.692
										238.15	518.993
										237.85	518.993
										237.85	491.692
										ErrBox	ErrBox
										238.85	506.444
										239.15	506.444
										239.15	532.729
										238.85	532.729
										238.85	506.444
										ErrBox	ErrBox
										239.85	480.699
										240.15	480.699
										240.15	512.788
										239.85	512.788
										239.85	480.699
										ErrBox	ErrBox
										240.85	510.675
										241.15	510.675
										241.15	543.224
										240.85	543.224
										240.85	510.675
										ErrBox	ErrBox
										241.85	513.339
										242.15	513.339
										242.15	543.488
										241.85	543.488
										241.85	513.339
										ErrBox	ErrBox
										242.85	502.105
										243.15	502.105
										243.15	523.845
										242.85	523.845
										242.85	502.105
										ErrBox	ErrBox
										243.85	509.842
										244.15	509.842
										244.15	538.654
										243.85	538.654
										243.85	509.842
										ErrBox	ErrBox
										244.85	504.177
										245.15	504.177
										245.15	532.856
										244.85	532.856
										244.85	504.177
										ErrBox	ErrBox
										245.85	507.045
										246.15	507.045
										246.15	540.126
										245.85	540.126
										245.85	507.045
										ErrBox	ErrBox
										72.85	468.839
										73.15	468.839
										73.15	499.867
										72.85	499.867
										72.85	468.839
										ErrBox	ErrBox
										83.85	530.74
										84.15	530.74
										84.15	554.611
										83.85	554.611
										83.85	530.74
										ErrBox	ErrBox
										92.85	526.498
										93.15	526.498
										93.15	548.837
										92.85	548.837
										92.85	526.498
										ErrBox	ErrBox
										98.85	479.734
										99.15	479.734
										99.15	502.891
										98.85	502.891
										98.85	479.734
										ErrBox	ErrBox
										105.85	524.864
										106.15	524.864
										106.15	549.111
										105.85	549.111
										105.85	524.864
										ErrBox	ErrBox
										144.85	477.03
										145.15	477.03
										145.15	504.737
										144.85	504.737
										144.85	477.03
										ErrBox	ErrBox
										155.85	529.308
										156.15	529.308
										156.15	548
										155.85	548
										155.85	529.308
										ErrBox	ErrBox
										165.85	529.11
										166.15	529.11
										166.15	548.367
										165.85	548.367
										165.85	529.11
										ErrBox	ErrBox
										179.85	524.069
										180.15	524.069
										180.15	552.209
										179.85	552.209
										179.85	524.069
										ErrBox	ErrBox
										227.85	456.459
										228.15	456.459
										228.15	482.009
										227.85	482.009
										227.85	456.459
										ErrBox	ErrBox

## Sheet: Table S1
	Table S1 A-ICP-MS data of XN02
	Signal intensity (cps)						Contributions			Reaction rate (%)			Ratios				Concentrations (mg g-1)		Single spot Lu-Hf ages			Isochron Lu-Hf ages
Sample names	172Yb	175Lu	176Hf	177Hf	178Hf		pLu(%)	pYb(%)	f176Hf(%)	Lu	Yb		172Yb/177Hf	175Lu/177Hf	Yb/Lu		Lu		Age (Ma)	uncertainty (Ma)		_6/7_LuHf	2s	_6/7_Hf	2s
Datas-XN02-1	26640000	11680000	1869	497	646		0.510013	2.68625	6.81991	0.00308	0.000323851		13629.1	11002	8.12793		5510.5		508.022	13.919		352.747	23.8877	3.60803	0.244332
Datas-XN02-2	24700000	10010000	1628	415	606		0.572947	3.4277	7.3682	0.00352	0.000388664		15190.7	11332.5	8.795		4722.61		509.535	16.7982		363.344	30.5882	3.74962	0.315663
Datas-XN02-3	26000000	11230000	1715	240	345		0.60283	3.04085	3.90634	0.00348	0.000344234		27834.3	22188.8	8.23056		5298.19		498.569	17.4296		711.422	73.7101	6.92402	0.717394
Datas-XN02-4	24280000	10860000	1753	450	638		0.578155	3.19773	7.17176	0.00353	0.000395204		13701.8	11332.5	7.93295		5123.63		508.641	20.9094		363.344	30.5882	3.73508	0.314439
Datas-XN02-5	26420000	10950000	1755	382	533		0.540671	3.30959	5.99685	0.00326	0.000375723		17557.9	13540.9	8.50765		5166.09		508.266	16.0809		434.15	31.1939	4.4039	0.316422
Datas-XN02-6	26500000	11160000	1862	475	720		0.516969	3.1483	7.65175	0.00324	0.000384123		13906.2	11141.2	8.18951		5265.17		519.928	12.1615		357.212	22.8069	3.77352	0.240927
Datas-XN02-7	26900000	10480000	1698	385	539		0.578155	2.83843	6.21604	0.00353	0.000306202		17435.7	12725.2	8.98999		4944.35		515.743	22.2221		407.996	37.4663	4.20966	0.386573
Datas-XN02-8	25720000	10320000	1675	355	529		0.56606	3.75375	6.2876	0.00344	0.000415834		18712.5	14158	8.67185		4868.87		508.215	14.8948		453.937	28.6457	4.61843	0.291446
Datas-XN02-9	25800000	10330000	1677	367	498		0.563651	3.5065	5.89164	0.00342	0.000388		17563.1	13335.7	8.64106		4873.58		510.869	15.4788		427.572	37.5171	4.35464	0.382096
Datas-XN02-10	26300000	11150000	1896	523	701		0.582411	3.07339	7.34713	0.0037	0.000377119		12524.3	10097.4	8.1382		5260.45		528.774	15.2355		323.745	18.0397	3.46709	0.193192
Datas-XN02-11	25520000	10210000	1713	365	502		0.598809	3.41542	5.76849	0.00377	0.000389198		17364.7	13169.4	8.65132		4816.97		530.971	20.449		422.24	42.4886	4.46474	0.449271
Datas-XN02-12	26520000	11310000	1931	484	676		0.548534	3.20563	6.91169	0.00349	0.000396082		13622.2	11094.4	8.0561		5335.94		531.493	16.0124		355.711	23.4532	3.81122	0.251286
Datas-XN02-1	23150000	10250000	1713	401	585		0.579928	3.06728	6.76561	0.00365	0.00038835		15255.9	12413	8.08419		4939.35		498.993	13.4557		411.731	31.7871	4.13447	0.319196
Datas-XN02-2	22730000	9650000	1672	361	537		0.589858	3.15971	6.34559	0.00385	0.000397968		16474.9	12866	8.42274		4650.22		519.134	10.6902		426.758	21.6281	4.4394	0.224989
Datas-XN02-3	23960000	10330000	1824	533	791		0.591105	3.3161	8.5947	0.00395	0.000433105		11711.7	9293.38	8.28937		4977.9		517.893	17.499		308.256	18.4114	3.27767	0.195768
Datas-XN02-4	23970000	10580000	1823	468	644		0.615587	3.34357	6.99397	0.004	0.000435931		13260.4	10858.2	8.03289		5098.38		512.173	14.7942		360.159	22.7012	3.72183	0.234591
Datas-XN02-5	22730000	9770000	1702	367	553		0.604379	3.06556	6.42185	0.00398	0.000394173		14698.9	11751	8.22781		4708.05		523.746	16.776		389.772	69.3182	4.09423	0.728129
Datas-XN02-6	24580000	10540000	1839	492	749		0.569256	3.19742	8.01098	0.00371	0.000406156		12937.3	10368.5	8.20729		5079.1		509.111	11.2366		343.917	20.6998	3.57166	0.214973
Datas-XN02-7	23540000	10190000	1767	437	627		0.643099	2.95083	6.99275	0.00421	0.000379147		13821.6	11203.2	8.11496		4910.44		517.926	14.7579		371.605	20.7146	3.88345	0.216477
Datas-XN02-8	24080000	10460000	1841	527	779		0.640085	3.51261	8.43255	0.00424	0.00045967		11698.9	9579.59	8.03289		5040.55		513.019	12.2797		317.749	22.7182	3.3407	0.23885
Datas-XN02-9	23790000	10420000	1868	512	718		0.562792	3.29502	7.63002	0.00381	0.000444493		11865.4	9828.87	7.94056		5021.27		530.393	17.2262		326.018	14.6153	3.51365	0.157516
Datas-XN02-10	23600000	10460000	1812	413	623		0.560049	3.60097	6.86361	0.00365	0.000473451		14495	12212.3	7.80719		5040.55		513.334	12.6926		405.075	21.5374	4.18965	0.222759
Datas-XN02-11	23830000	10370000	1859	548	789		0.606237	3.46329	8.47086	0.00411	0.000464208		10987.2	9101.43	7.94056		4997.18		525.206	18.5557		301.889	18.798	3.25118	0.202444
Datas-XN02-12	23620000	10330000	1915	566	839		0.565619	3.4864	8.74317	0.00395	0.000484505		10553	8798.55	7.88926		4977.9		539.398	17.6147		291.843	13.8412	3.23809	0.153573
Datas-XN02-1	23640000	10730000	1733	280	368		0.580672	2.92303	4.18624	0.00353	0.00036718		21747.8	18366.5	7.82118		4711.69		497.136	11.9647		609.42	60.742	5.93235	0.591288
Datas-XN02-2	22190000	9320000	1578	332	454		0.590307	3.3756	5.68325	0.00376	0.000411074		17145.1	13391.3	8.45672		4092.54		510.227	10.9151		444.336	31.0489	4.51042	0.315175
Datas-XN02-3	25770000	11360000	1895	375	527		0.591215	3.03361	5.47887	0.00372	0.000383091		17680.6	14531.7	8.03645		4988.33		506.919	13.9172		482.178	38.0252	4.85211	0.382643
Datas-XN02-4	23530000	10140000	1685	342	467		0.588257	3.49757	5.50603	0.00369	0.000430478		17606.1	14181.1	8.20046		4452.61		502.836	12.7901		470.544	33.4268	4.69802	0.33374
Datas-XN02-5	24130000	10840000	1799	362	501		0.51333	3.42504	5.51373	0.00322	0.000440252		17018.4	14334.8	7.84169		4759.99		503.548	15.3424		475.645	41.2711	4.75609	0.41268
Datas-XN02-6	23190000	9820000	1626	271	406		0.578816	3.63286	4.88351	0.00367	0.000443975		21756.2	17286.1	8.31321		4312.09		510.899	14.5414		573.571	45.5282	5.78096	0.458874
Datas-XN02-7	23170000	10390000	1756	348	482		0.571999	3.53107	5.4772	0.00366	0.000461676		16791.8	14181.1	7.82118		4562.39		512.925	11.8512		470.544	58.4968	4.79139	0.595653
Datas-XN02-8	24080000	10010000	1684	273	375		0.590083	3.5714	4.43507	0.00377	0.000431356		22223.3	17399.8	8.43622		4395.53		517.457	14.4988		577.345	41.9357	5.86649	0.426115
Datas-XN02-9	23880000	10340000	1748	252	351		0.558524	3.24166	3.97143	0.00359	0.000410722		23839	19518.6	8.0672		4540.43		525.027	8.4244		647.649	47.4935	6.64549	0.487329
Datas-XN02-10	23780000	9800000	1647	324	462		0.533684	4	5.58797	0.00342	0.00048107		18403	14373.8	8.45672		4303.31		510.814	13.3568		476.937	30.0486	4.84206	0.305065
Datas-XN02-11	23420000	9950000	1711	279	398		0.57306	3.19799	4.60323	0.00375	0.000405096		20888.1	16845.7	8.19021		4369.18		531.122	10.347		558.958	43.2378	5.84087	0.451817
Datas-XN02-12	21620000	8720000	1537	350	485		0.543312	3.68862	6.27154	0.00365	0.000455829		15375.6	11780.7	8.62073		3829.07		533.16	14.5168		390.897	25.9521	4.17347	0.277081
Datas-XN02-1	28000000	12010000	2009	465	678		0.49849	2.62795	6.63627	0.00316	0.000324786		15566.3	12466.5	8.23246		5776.38		511.69	16.4134		404.528	27.007	4.15997	0.277727
Datas-XN02-2	27000000	10850000	1823	460	670		0.575788	3.32209	7.31472	0.00365	0.000384615		15079.9	11318.6	8.78401		5218.46		504.004	17.7357		367.28	65.0751	3.74709	0.663914
Datas-XN02-3	25900000	10740000	1762	338	451		0.516794	2.85898	5.08039	0.00321	0.000334849		19690.8	15276.9	8.49802		5165.55		508.449	12.2371		495.722	38.9962	4.98225	0.391932
Datas-XN02-4	27800000	11110000	1900	526	744		0.558226	3.03543	7.75906	0.00361	0.000364117		13342.3	10204.3	8.62059		5343.51		513.25	17.4971		331.119	21.5743	3.45709	0.225249
Datas-XN02-5	26800000	10920000	1983	581	881		0.545291	3.04566	8.81712	0.00373	0.000386808		11846.9	9082.14	8.60016		5252.13		536.532	14.5115		294.707	20.3981	3.2547	0.225274
Datas-XN02-6	28200000	11320000	1893	416	615		0.600954	3.24424	6.43066	0.00378	0.000372447		17526.8	13247.6	8.72273		5444.51		505.139	14.4504		429.874	44.5731	4.3541	0.451471
Datas-XN02-7	28900000	12020000	2000	430	590		0.598334	3.36987	5.86072	0.00374	0.000398671		17348.3	13623.2	8.39588		5781.19		504.401	19.0052		442.061	27.2894	4.4439	0.274331
Datas-XN02-8	28000000	11850000	2054	447	674		0.531869	2.90712	6.49067	0.00345	0.000364716		16136.6	12955.4	8.21203		5699.42		522.661	17.5194		420.391	29.1667	4.40948	0.305929
Datas-XN02-9	28200000	12290000	2162	774	1093		0.525499	2.83872	10.0125	0.00345	0.000371179		9353.41	7750.45	7.95668		5911.05		509.542	12.3209		251.495	20.4756	2.67196	0.217538
Datas-XN02-10	26300000	11210000	1948	535	730		0.521868	2.91124	7.37517	0.00338	0.000366581		12730.9	10323.8	8.13032		5391.61		516.997	12.6405		334.999	16.3841	3.50868	0.171602
Datas-XN02-11	23400000	9640000	1701	440	617		0.547411	3.05944	7.17934	0.00361	0.000378913		13753.7	10787.4	8.4061		4636.49		526.525	17.235		350.04	28.7769	3.72632	0.306342
Datas-XN02-12	28740000	12240000	2131	485	695		0.549659	2.973	6.47482	0.00356	0.000372666		15303.5	12378.9	8.15075		5887		521.517	14.7469		401.686	29.7014	4.20328	0.310799
Datas-XN02-1	24500000	10490000	1533	198	244		0.604471	2.85471	3.13523	0.00335	0.000311716		29615.7	22485.5	8.66606		4199.83		506.86	12.6256		755.857	55.6038	7.42175	0.545973
Datas-XN02-2	26460000	11370000	1777	429	604		0.555579	2.86904	6.71839	0.0033	0.000332905		14867.2	11195.1	8.73785		4552.15		523.216	12.8295		376.327	22.6441	3.96169	0.23838
Datas-XN02-3	27400000	12170000	1944	479	673		0.51552	2.71319	6.88886	0.00312	0.000332446		13604.9	10696.5	8.36865		4872.44		533.148	12.5115		359.568	23.3685	3.86463	0.251165
Datas-XN02-4	29400000	12420000	1829	289	387		0.549572	2.8044	4.1404	0.00306	0.000304664		24797.5	18939.4	8.61479		4972.53		504.502	10.5904		636.654	50.7196	6.28728	0.500882
Datas-XN02-5	29400000	12480000	1870	233	348		0.546667	3.21109	3.59788	0.00311	0.000353415		30514.3	23277.9	8.62504		4996.55		516.16	9.87209		782.496	72.3618	7.86272	0.72711
Datas-XN02-6	31600000	13880000	2170	550	788		0.542693	2.90829	7.14727	0.0032	0.000342682		13543	10740	8.29686		5557.06		516.917	12.1187		361.029	19.9345	3.77195	0.20827
Datas-XN02-7	29280000	13200000	2026	448	670		0.526129	2.73356	6.53147	0.00303	0.000325034		15329.8	12641.4	7.97893		5284.82		509.261	7.61208		424.944	22.596	4.34473	0.231027
Datas-XN02-8	29100000	13030000	2026	376	535		0.521845	2.71967	5.1264	0.00305	0.000323516		18292.6	14969.1	8.04047		5216.75		524.6	13.4267		503.191	29.9234	5.22219	0.31055
Datas-XN02-9	29000000	12770000	1965	564	796		0.551349	2.76547	7.96981	0.00317	0.000318962		12011.9	9767.27	8.09175		5112.66		500.358	10.417		328.33	16.4869	3.34943	0.16819
Datas-XN02-10	27250000	11680000	1786	253	349		0.577695	3.07223	3.87612	0.0033	0.000342612		24832.3	19790.6	8.25584		4676.26		517.355	7.99238		665.268	52.3044	6.71974	0.528317
Datas-XN02-11	28500000	12850000	2006	504	723		0.536451	2.73478	7.11079	0.00314	0.000328237		13082.2	10985.6	7.83535		5144.69		514.295	10.7455		369.286	17.0645	3.83701	0.177306
Datas-XN02-12	27000000	11880000	1855	262	342		0.558602	3.04791	3.66999	0.00326	0.000359805		23610.8	19570.7	7.93791		4756.33		529.841	12.1904		657.876	48.1398	6.79191	0.496996
Datas-XN02-1	25300000	9440000	1501	349	535		0.480687	3.16038	7.05786	0.0029	0.000324627		18017	12522	9.4999		4183.91		512.761	12.3373		399.548	24.6034	4.13526	0.254642
Datas-XN02-2	25700000	9740000	1583	285	455		0.505327	3.08888	5.64697	0.00312	0.000329171		22633.5	15954.2	9.36668		4316.87		532.865	15.1791		509.063	43.4123	5.39466	0.46005
Datas-XN02-3	25060000	9910000	1539	328	493		0.534658	2.88413	6.32678	0.00313	0.000304228		19088.4	14087.2	8.94651		4392.22		502.691	16.1552		449.492	36.5542	4.52469	0.367963
Datas-XN02-4	26900000	10430000	1668	436	587		0.466294	3.17478	6.99372	0.0028	0.00033734		15320.1	11127.7	9.08998		4622.69		510.723	13.7769		355.061	26.1876	3.65761	0.269768
Datas-XN02-5	28570000	11770000	1912	442	631		0.45723	2.77481	6.51102	0.00278	0.000316742		16113.9	12463	8.53659		5216.59		521.939	13.8715		397.668	20.1337	4.1654	0.210892
Datas-XN02-6	27900000	10510000	1670	359	531		0.554852	3.58784	6.34286	0.00329	0.000364662		19339.4	13722.3	9.30519		4658.14		505.263	15.6203		437.847	41.1078	4.43091	0.416002
Datas-XN02-7	29700000	12360000	2016	436	619		0.511444	2.82112	6.07321	0.0031	0.000324055		17024	13375.7	8.40337		5478.08		522.224	12.7574		426.79	24.4112	4.45205	0.254645
Datas-XN02-8	29200000	11770000	1911	391	605		0.5204	2.88894	6.29071	0.00312	0.000322712		18895.5	14632	8.52634		5216.59		514.988	15.1415		466.875	26.2908	4.81347	0.271057
Datas-XN02-9	27800000	10920000	1760	423	608		0.555657	3.13903	6.82881	0.0033	0.000333595		16348	12204.6	8.84403		4839.86		505.776	12.1233		389.421	33.5338	3.96546	0.341473
Datas-XN02-10	28340000	11360000	1892	497	718		0.499318	2.9067	7.5109	0.00305	0.00032413		14366.1	10966.4	8.64932		5034.87		517.856	10.1502		349.915	22.9727	3.67568	0.241317
Datas-XN02-11	27010000	10870000	1775	395	548		0.534593	3.19333	6.11245	0.00319	0.000349839		17160.3	13209	8.57758		4817.7		511.873	14.7752		421.468	38.0899	4.31069	0.389576
Datas-XN02-12	26300000	10170000	1671	382	530		0.526246	3.03064	6.30661	0.00316	0.000320587		17274.8	12763.3	8.93626		4507.45		514.927	11.3386		407.25	36.6747	4.19895	0.378134
Datas-XN02-1	24200000	10410000	1648	491	691		0.553146	2.70513	8.19826	0.00335	0.000319504		12565.5	10020.9	8.27074		5195.14		484.353	15.5141		329.979	18.0153	3.26546	0.178279
Datas-XN02-2	22430000	9940000	1697	446	649		0.556338	3.10961	7.54587	0.00361	0.00040672		12750.5	10520	7.99437		4960.58		520.229	13.7671		346.412	16.7998	3.65756	0.177379
Datas-XN02-3	23700000	10350000	1828	523	731		0.542541	3.27757	7.91091	0.00363	0.00043956		11383.6	9380.17	8.00461		5165.2		533.362	12.2614		308.879	18.2135	3.35737	0.197972
Datas-XN02-4	25600000	11430000	1912	553	771		0.581266	2.83605	7.96127	0.00366	0.00036535		11601.5	9797.84	7.81012		5704.17		503.936	8.08212		322.632	16.5596	3.31405	0.170099
Datas-XN02-5	25800000	10300000	1734	475	660		0.564839	3.28317	7.50916	0.0036	0.000379777		13664.6	10274.4	8.77231		5140.24		510.284	13.1202		338.325	16.7529	3.50208	0.173413
Datas-XN02-6	25600000	10940000	1903	546	820		0.543001	3.14418	8.5329	0.00356	0.000401709		11739.6	9515.38	8.13767		5459.64		519.899	12.254		313.331	19.9918	3.34184	0.213223
Datas-XN02-7	25290000	11200000	1917	572	809		0.567406	3.29852	8.42593	0.00366	0.000427878		11066.9	9297.6	7.85106		5589.39		511.222	12.4754		306.16	14.3154	3.20678	0.149942
Datas-XN02-8	26400000	11340000	1964	529	795		0.531646	2.93119	8.11828	0.00346	0.000374033		12476.4	10254.4	8.02508		5659.26		519.628	12.5671		337.668	15.2368	3.58327	0.16169
Datas-XN02-9	25960000	10800000	1806	498	741		0.525698	3.04922	8.12545	0.0033	0.000356181		13251.4	10375.3	8.42428		5389.77		500.699	12.4931		341.648	16.3409	3.49294	0.167066
Datas-XN02-10	26900000	11940000	2041	605	882		0.557608	2.91187	8.53211	0.00357	0.000377442		11020.1	9430.42	7.70776		5958.69		508.915	11.0102		310.534	16.5682	3.24159	0.172952
Datas-XN02-11	25400000	11290000	1985	560	806		0.551345	2.89266	8.06049	0.00362	0.000383865		11308.4	9689.97	7.69752		5634.3		524.636	13.1033		319.081	12.9576	3.41672	0.13875
Datas-XN02-12	25130000	10810000	1971	591	838		0.572867	2.95681	8.41599	0.00391	0.000393499		10601.2	8757.94	7.98413		5394.76		542.676	11.9354		288.39	12.1726	3.20734	0.135378
Datas-XN02-1	25400000	11020000	1731	433	599		0.561968	2.93159	6.52362	0.00333	0.000344498		15146.2	12204	8.16372		5197.26		510.821	14.7926		387.283	27.3377	3.9703	0.280258
Datas-XN02-2	24900000	9570000	1583	497	716		0.655405	3.70304	9.00446	0.00408	0.000402762		12596.4	8962	9.24541		4513.41		517.722	13.4178		284.401	18.5644	3.03578	0.198163
Datas-XN02-3	26800000	10350000	1641	533	751		0.602988	3.50129	9.07848	0.00359	0.000365666		12684.7	9084.98	9.18418		4881.27		496.162	10.0339		288.303	14.0275	2.95096	0.14358
Datas-XN02-4	26700000	10910000	1723	502	694		0.622443	3.7807	8.09836	0.0037	0.000419328		13193.9	10088.6	8.60252		5145.38		499.158	11.2885		320.154	17.2981	3.2617	0.176232
Datas-XN02-5	24900000	10120000	1681	481	691		0.585864	3.2657	8.14794	0.00368	0.00037931		12808.6	9736.29	8.65354		4772.8		530.002	11.6338		308.972	14.822	3.34527	0.16048
Datas-XN02-6	25700000	10830000	1697	334	508		0.621034	3.50371	5.93928	0.00368	0.000397479		18647.7	14712.6	8.3372		5107.65		510.682	12.487		466.891	27.9593	4.75538	0.284772
Datas-XN02-7	25200000	10200000	1665	351	534		0.58503	3.3328	6.29043	0.00362	0.000380105		17778.6	13546.1	8.63313		4810.53		532.283	12.8885		429.874	28.6914	4.58179	0.305806
Datas-XN02-8	26070000	11490000	1850	554	842		0.566791	3.30336	9.04623	0.00347	0.000404919		11545.2	9577.83	7.92901		5418.92		511.529	11.8714		303.944	14.9671	3.20682	0.157914
Datas-XN02-9	25700000	10790000	1786	475	671		0.607932	2.85615	7.45939	0.00383	0.000345263		13121	10467.5	8.24536		5088.78		537.667	11.1695		332.176	14.1524	3.62169	0.154303
Datas-XN02-10	25800000	10580000	1675	463	691		0.616105	3.23118	8.24992	0.00372	0.000364195		13403	10446.8	8.43924		4989.74		509.048	10.4157		331.52	20.0321	3.4505	0.208496
Datas-XN02-11	28800000	12330000	1920	462	651		0.601098	3.30287	6.71222	0.00359	0.0003875		15035.5	12346.2	8.01065		5815.08		511.645	13.3827		391.797	19.6887	4.03123	0.202579
Datas-XN02-12	25300000	10330000	1636	326	463		0.625758	3.45342	5.66281	0.00379	0.000387714		18355.4	14238	8.48006		4871.84		523.681	11.9048		451.83	27.5627	4.70599	0.287077
Datas-XN02-1	24500000	10290000	1411	308	443		0.567252	3.20428	6.20455	0.00299	0.000323394		17795.7	14067.9	8.33163		4900.35		510.508	11.3107		438.62	33.5521	4.47787	0.342533
Datas-XN02-2	22600000	9530000	1302	293	426		0.647308	3.22765	6.45351	0.00339	0.000327939		16860.4	13528.2	8.20865		4538.42		505.372	11.6769		421.793	25.6311	4.27387	0.25971
Datas-XN02-3	25300000	11110000	1522	441	663		0.633346	3.08032	8.47968	0.00329	0.000322424		12615.3	10516	7.90121		5290.86		491.312	11.5787		327.875	19.5633	3.30079	0.196948
Datas-XN02-4	26800000	10620000	1525	366	564		0.626002	3.06805	7.31923	0.00339	0.000300994		16441.2	12329.9	8.78254		5057.51		518.626	12.4443		384.431	24.6533	4.03539	0.258786
Datas-XN02-5	26900000	11450000	1689	409	609		0.599023	3.38717	7.11487	0.00331	0.000360372		15008	11967.3	8.25989		5452.78		528.698	12.1288		373.124	16.8905	3.98443	0.180366
Datas-XN02-6	26600000	10900000	1564	421	573		0.650138	3.35776	7.22272	0.00346	0.000332245		14402.9	11112.5	8.53659		5190.85		508.623	14.9306		346.473	21.8456	3.56268	0.224632
Datas-XN02-7	23990000	10420000	1569	404	591		0.597214	3.23225	7.43856	0.0033	0.000353452		13595.5	11159.4	8.02419		4962.26		527.716	12.4262		347.935	17.4407	3.72146	0.186544
Datas-XN02-8	27200000	11240000	1640	387	596		0.622838	3.44619	7.2656	0.00332	0.000345155		16070.4	12534.4	8.44436		5352.77		508.871	16.0212		390.808	28.9522	4.0224	0.297991
Datas-XN02-9	26500000	11350000	1726	439	621		0.651077	3.46723	7.19578	0.00357	0.000365555		14230.3	11375.3	8.2394		5405.15		523.502	11.4117		354.669	20.9838	3.75318	0.222055
Datas-XN02-10	24600000	10120000	1594	392	583		0.644073	3.54437	7.30427	0.00363	0.00036857		14910.6	11449.2	8.57758		4819.4		536.987	12.1236		356.972	24.1559	3.87998	0.262554
Datas-XN02-11	24800000	10110000	1512	391	564		0.69651	3.621	7.47172	0.00376	0.000358149		15130.7	11549.2	8.62882		4814.63		512.873	13.8128		360.09	18.6806	3.74387	0.194223
Datas-XN02-12	26990000	12200000	1820	459	646		0.605092	3.45798	6.9834	0.00321	0.000376238		13895.4	11859.9	7.71675		5809.94		508.015	9.9534		369.778	20.7361	3.78798	0.212419
Datas-XN02-1	19610000	8010000	1217	253	351		0.571453	3.22006	5.7311	0.00327	0.000341463		20233.9	15279.2	8.69993		5063.2		500.607	12.1459		475.653	39.9211	4.7376	0.397622
Datas-XN02-2	19900000	7960000	1262	363	490		0.579496	3.59033	7.73401	0.00347	0.00038858		13849.2	10205.8	8.91487		5031.59		510.662	15.07		317.714	25.3468	3.2985	0.26315
Datas-XN02-3	21400000	8950000	1364	313	438		0.561669	3.05125	6.29233	0.00323	0.000333333		17489.1	13590.2	8.45429		5657.38		501.022	15.3353		423.074	25.5095	4.24267	0.255814
Datas-XN02-4	20800000	8120000	1309	377	515		0.632596	3.52521	7.8161	0.00386	0.000386893		13716.7	10166.6	8.8637		5132.73		519.93	15.014		316.492	19.7139	3.34877	0.208591
Datas-XN02-5	20600000	7990000	1259	296	420		0.568707	3.70571	6.65877	0.0034	0.000389961		17255.3	12557.3	9.02746		5050.55		515.207	13.6484		390.917	25.9273	4.04765	0.268458
Datas-XN02-6	21850000	8990000	1396	314	451		0.602647	3.3993	6.35345	0.00354	0.00037234		17486.5	13555.4	8.47476		5682.66		509.343	11.6839		421.989	26.5873	4.30528	0.271253
Datas-XN02-7	21500000	9030000	1421	324	451		0.615824	3.15586	6.26405	0.00367	0.000359329		16112	12862.8	8.22911		5707.95		518.424	12.7179		400.428	20.6753	4.1546	0.214514
Datas-XN02-8	20880000	8050000	1310	435	599		0.576993	3.33278	9.06323	0.00357	0.000361261		11826.2	8695.08	8.93534		5088.48		521.396	13.3435		270.684	15.4147	2.91159	0.165807
Datas-XN02-9	21230000	8390000	1363	398	577		0.593453	3.51911	8.37728	0.0037	0.000395101		12999.9	9863.07	8.65899		5303.4		528.209	14.2994		307.045	19.8342	3.32106	0.214531
Datas-XN02-10	21400000	8780000	1360	312	438		0.583373	3.29204	6.38427	0.00346	0.000365503		16554.5	13118.1	8.29053		5549.92		514.75	15.2054		408.377	23.7679	4.21227	0.245158
Datas-XN02-11	21200000	8020000	1295	394	588		0.645866	3.3722	9.11921	0.00399	0.000358113		12913.5	9440.37	8.98652		5069.52		519.713	16.9104		293.886	15.8259	3.15284	0.169782
Datas-XN02-12	21700000	8360000	1334	326	473		0.642071	3.80152	6.97013	0.00393	0.000406442		16173.2	12015	8.84323		5284.43		524.748	12.9093		374.036	24.6859	3.9582	0.261237
Datas-XN02-1	17910000	7270000	1059	241	342		0.551516	2.63466	6.34946	0.00303	0.000266022		17256.5	13100.9	8.66016		4626.62		520.335	12.8692		410.392	24.8134	4.27789	0.258653
Datas-XN02-2	16790000	6480000	963	282	413		0.519789	3.28958	8.47497	0.00291	0.000323575		13649.8	9905.59	9.05986		4123.87		514.907	15.5002		310.297	21.9874	3.27489	0.232057
Datas-XN02-3	17970000	7170000	1059	260	402		0.565211	3.25833	7.49516	0.00312	0.000326954		16009.1	12054.1	8.7319		4562.98		513.077	14.6548		377.598	21.0063	3.92889	0.218569
Datas-XN02-4	21460000	8930000	1366	353	515		0.59878	3.49586	7.53489	0.00342	0.000377907		14020.2	11022.3	8.36294		5683.05		529.076	13.719		345.278	20.1987	3.70688	0.216852
Datas-XN02-5	19690000	7710000	1141	249	371		0.545192	3.34769	6.45177	0.003	0.000330319		18127.1	13537.6	8.80364		4906.64		516.832	13.4309		424.072	22.5209	4.39535	0.233421
Datas-XN02-6	19680000	7680000	1116	249	381		0.573338	3.30754	6.75985	0.00308	0.000317523		18241.8	13607.4	8.81389		4887.55		503.048	14.6784		426.258	29.446	4.31372	0.297993
Datas-XN02-7	19230000	7960000	1207	308	435		0.569789	3.2622	7.12129	0.00318	0.000343685		14128.5	11162.1	8.32195		5065.74		520.748	15.4587		349.658	27.0188	3.67802	0.284209
Datas-XN02-8	21310000	8860000	1330	266	391		0.581538	3.07382	5.81041	0.0032	0.000319652		18650.1	14789	8.2912		5638.5		521.631	14.503		463.272	26.8769	4.81349	0.279256
Datas-XN02-9	20100000	8180000	1226	356	507		0.556867	3.57566	8.22007	0.00304	0.00035743		13363.7	10291.8	8.53717		5205.75		501.89	13.1826		322.394	22.9696	3.30685	0.235603
Datas-XN02-10	19900000	8220000	1240	365	513		0.570623	3.53113	8.19487	0.00313	0.000363974		12649.5	10018.4	8.30145		5231.2		504.577	16.4542		313.829	21.0399	3.23545	0.216913
Datas-XN02-11	20680000	8720000	1300	263	375		0.613046	3.5254	5.73164	0.00332	0.000361746		18540.7	14830.6	8.21946		5549.4		511.31	15.1566		464.573	33.3877	4.727	0.339717
Datas-XN02-12	19980000	7780000	1214	336	496		0.617627	3.68182	8.14867	0.00349	0.000371328		14007.5	10559.4	8.72165		4951.19		518.915	13.0076		330.776	20.1496	3.50587	0.213564
Datas-XN02-1	24500000	10490000	1533	198	244		0.604471	2.85471	3.13523	0.00335	0.000311716		29612.6	22483.6	8.66606		4199.83		506.945	12.6277		755.727	55.5942	7.42173	0.545971
Datas-XN02-2	26460000	11370000	1777	429	604		0.555579	2.86904	6.71839	0.0033	0.000332905		14865.7	11194.1	8.73785		4552.15		523.304	12.8317		376.262	22.6402	3.96168	0.23838
Datas-XN02-3	27400000	12170000	1944	479	673		0.51552	2.71319	6.88886	0.00312	0.000332446		13603.5	10695.6	8.36865		4872.44		533.237	12.5136		359.506	23.3645	3.86462	0.251164
Datas-XN02-4	29400000	12420000	1829	289	387		0.549572	2.8044	4.1404	0.00306	0.000304664		24794.9	18937.8	8.61479		4972.53		504.587	10.5922		636.544	50.7109	6.28726	0.50088
Datas-XN02-5	29400000	12480000	1870	233	348		0.546667	3.21109	3.59788	0.00311	0.000353415		30511.1	23275.9	8.62504		4996.55		516.247	9.87375		782.36	72.3493	7.86269	0.727108
Datas-XN02-6	31600000	13880000	2170	550	788		0.542693	2.90829	7.16238	0.0032	0.000342682		13541.6	10739.1	8.29686		5557.06		516.921	12.1187		360.967	19.931	3.77194	0.20827
Datas-XN02-7	29280000	13200000	2026	448	670		0.526208	2.73397	6.53248	0.00303	0.000325034		15328.2	12640.3	7.97893		5284.82		509.262	7.6132		424.87	22.5921	4.34404	0.230991
Datas-XN02-8	29100000	13030000	2026	376	535		0.521845	2.71967	5.14161	0.00305	0.000323516		18290.6	14967.8	8.04047		5216.75		524.604	13.4266		503.104	29.9183	5.22217	0.310549
Datas-XN02-9	29000000	12770000	1965	564	796		0.551349	2.76547	7.98529	0.00317	0.000318962		12010.7	9766.43	8.09175		5112.66		500.359	10.4169		328.273	16.4841	3.34942	0.16819
Datas-XN02-10	27250000	11680000	1786	253	349		0.57787	3.07317	3.87734	0.0033	0.000342612		24829.7	19788.9	8.25584		4676.26		517.274	7.9934		665.153	52.2954	6.71761	0.52815
Datas-XN02-11	28500000	12850000	2006	504	723		0.536451	2.73478	7.11079	0.00314	0.000328237		13080.8	10984.7	7.83535		5144.69		514.382	10.7474		369.222	17.0616	3.837	0.177306
Datas-XN02-12	27000000	11880000	1855	262	342		0.558602	3.04791	3.66999	0.00326	0.000359805		23608.3	19569	7.93791		4756.33		529.93	12.1925		657.762	48.1315	6.79189	0.496994
Datas-XN02-1	27200000	12440000	1833	384	539		0.559412	2.44598	5.78985	0.00309	0.000276854		17708.3	14230	8.1827		5101.5		490.884	13.8538		476.388	28.2557	4.65701	0.276218
Datas-XN02-2	27100000	11390000	1731	343	499		0.581778	3.04617	5.62559	0.00331	0.000331376		19230.8	14424.4	8.76645		4670.91		503.195	14.5422		482.896	25.8071	4.83132	0.258197
Datas-XN02-3	27000000	11180000	1690	271	381		0.585293	3.19666	4.36835	0.00333	0.000342987		24525.7	18204.6	8.85862		4584.79		509.054	11.7547		609.448	64.2281	6.08778	0.641575
Datas-XN02-4	28300000	11580000	1767	355	483		0.575583	3.0144	5.37476	0.00333	0.000324755		19581.7	14385.1	8.95079		4748.83		513.183	12.8636		481.58	24.0625	4.90135	0.244899
Datas-XN02-5	28400000	11930000	1780	363	540		0.568576	2.84294	6.00335	0.00322	0.000308274		18495.2	14003.6	8.68452		4892.36		500.007	9.57605		468.806	30.4038	4.67918	0.303462
Datas-XN02-6	28100000	11730000	1838	477	695		0.526215	2.88625	7.46299	0.00315	0.000328744		13911.2	10495.7	8.71525		4810.34		520.169	12.0011		351.371	17.9335	3.70692	0.189196
Datas-XN02-7	29400000	13100000	2032	421	618		0.558686	2.37322	5.90346	0.00332	0.000286925		16465.8	13331.7	8.12126		5372.16		527.634	9.80261		446.313	37.201	4.69738	0.391536
Datas-XN02-8	29800000	13230000	1949	391	565		0.575631	3.05066	5.71328	0.00327	0.000350488		17737.4	14307.2	8.15198		5425.47		501.972	8.60426		478.97	30.1496	4.78476	0.301186
Datas-XN02-9	31300000	13540000	2085	455	694		0.514522	2.92253	6.49057	0.00308	0.000345156		15898.1	12540	8.33632		5552.6		525.467	13.3834		419.809	23.1617	4.4278	0.24429
Datas-XN02-10	29330000	13880000	2048	476	702		0.535715	2.71818	6.72333	0.00309	0.000333489		14332.3	12220.7	7.71161		5692.03		506.13	11.0951		409.12	16.2085	4.16567	0.165035
Datas-XN02-11	28400000	12810000	1985	455	641		0.529168	2.78466	6.32792	0.0032	0.000345479		14171.1	11680	7.97788		5253.24		532.384	11.158		391.017	22.2087	4.17151	0.236931
Datas-XN02-12	26200000	11350000	1752	323	433		0.582926	2.93915	4.8782	0.00352	0.000351281		18381	14624.2	8.26463		4654.51		538.654	9.34632		489.584	33.1586	5.20442	0.352486
Datas-XN02-1	29900000	13310000	1964	541	782		0.511367	2.5135	7.85945	0.00285	0.000286676		12874.5	10343	8.17995		5282.29		518.358	12.1388		332.742	18.8358	3.51222	0.198819
Datas-XN02-2	29800000	13060000	1897	518	782		0.547447	2.96942	8.17749	0.003	0.000324301		13531.1	10591.7	8.39522		5183.07		505.436	9.30842		340.744	17.1762	3.51865	0.177368
Datas-XN02-3	31100000	13770000	1988	548	783		0.581168	2.6384	7.77457	0.00317	0.000289497		13296	10549.4	8.28246		5464.85		506.84	11.36		339.384	17.8913	3.49904	0.184459
Datas-XN02-4	29000000	12120000	1806	461	686		0.575215	3.00268	7.50986	0.00324	0.000321116		14620.2	10988.1	8.74374		4810.02		522.867	12.7749		353.495	21.2586	3.7497	0.225501
Datas-XN02-5	29600000	12420000	1849	528	775		0.568909	3.01611	8.32552	0.00319	0.000321652		13034.1	9842.21	8.70273		4929.08		515.917	11.6545		316.632	17.7976	3.34324	0.18792
Datas-XN02-6	30300000	13260000	1956	565	817		0.57592	2.62546	8.24306	0.0032	0.000290266		12374	9805.69	8.29271		5262.44		513.731	13.4079		315.457	16.1936	3.31367	0.170103
Datas-XN02-7	29900000	12840000	1959	526	783		0.570236	2.81152	7.87989	0.00327	0.000316674		13078.7	10262.7	8.37472		5095.76		531.207	10.98		330.158	17.7381	3.57264	0.191944
Datas-XN02-8	30000000	13150000	1932	572	800		0.55496	2.79625	8.30346	0.00306	0.000306853		12073.5	9627.08	8.24146		5218.79		508.717	13.7411		309.711	16.3185	3.22349	0.169844
Datas-XN02-9	32000000	14260000	2103	625	912		0.582186	2.87173	8.38158	0.00322	0.000321064		11805.2	9592.14	8.0877		5659.31		509.309	11.3102		308.587	16.9046	3.21829	0.176301
Datas-XN02-10	30600000	14010000	2196	610	911		0.576549	2.62364	8.23324	0.00336	0.000318701		11547.9	9715.57	7.81093		5560.09		538.739	9.62869		312.557	13.7295	3.44365	0.151267
Datas-XN02-11	29700000	13630000	2060	491	750		0.583214	3.08007	7.241	0.00329	0.000363469		13585	11489.7	7.76993		5409.28		524.704	11.4532		369.633	19.2015	3.92334	0.203808
Datas-XN02-12	30700000	13130000	1970	584	824		0.595698	3.06679	8.33566	0.00332	0.000332906		11983.5	9437.98	8.34396		5210.85		512.353	9.87755		303.627	16.3656	3.18401	0.171619
Datas-XN02-1	27300000	11030000	1475	301	440		0.658792	3.561	5.95999	0.00329	0.000329536		19944.1	14706.9	8.93048		5282.29		497.151	14.55		470.698	34.6304	4.6677	0.343414
Datas-XN02-2	27100000	10870000	1460	325	455		0.627655	3.48295	6.19872	0.00318	0.000325506		18230.5	13366.5	8.98174		5183.07		503.614	11.8467		427.799	28.6057	4.3087	0.28811
Datas-XN02-3	28200000	11450000	1567	446	659		0.610094	3.04738	8.34683	0.00315	0.000291345		13880.8	10212.3	8.95098		5464.85		503.82	15.2672		326.849	21.7075	3.37049	0.223849
Datas-XN02-4	29100000	11990000	1599	301	427		0.626735	3.53088	5.31826	0.00314	0.000332097		21358	15951	8.81769		4810.02		502.446	11.5294		510.516	32.5897	5.0821	0.324426
Datas-XN02-5	29200000	12260000	1678	352	506		0.617832	3.03157	5.95935	0.00318	0.000299747		18289.2	13967.7	8.62288		4929.08		515.307	15.2437		447.039	26.5511	4.5959	0.272966
Datas-XN02-6	29400000	12460000	1720	372	519		0.564667	3.10063	5.94868	0.00292	0.000309483		17507.5	13434.6	8.58187		5262.44		517.679	12.3202		429.976	24.563	4.44045	0.253667
Datas-XN02-7	28800000	11580000	1634	438	636		0.648962	3.30355	7.76946	0.00345	0.000326131		14201.8	10496.6	8.90997		5095.76		520.34	10.1876		335.946	29.1068	3.55617	0.308111
Datas-XN02-8	28700000	11620000	1650	501	726		0.551775	3.29467	8.6962	0.00292	0.000321472		12745.2	9344.74	8.98174		5218.79		513.36	13.3592		299.081	15.3795	3.15491	0.162234
Datas-XN02-9	29100000	12870000	1803	398	580		0.584345	2.99266	6.35096	0.00305	0.000314627		16359.1	13101.2	8.22301		5659.31		520.741	12.9498		419.307	20.611	4.37474	0.21504
Datas-XN02-10	28100000	11330000	1650	467	699		0.578506	3.33186	8.33451	0.00315	0.000333199		13380.9	9777.37	9.0125		5560.09		529.852	11.671		312.927	16.8365	3.39422	0.18262
Datas-XN02-11	28200000	12220000	1696	369	553		0.571358	3.1694	6.56047	0.00295	0.00032169		16977.7	13265.8	8.42808		5409.28		513.138	12.5838		424.575	26.7673	4.37444	0.275786
Datas-XN02-12	27800000	11730000	1710	400	562		0.634623	2.96059	6.50425	0.00343	0.000306303		15607.6	11891.4	8.64339		5210.85		538.139	14.0704		380.587	21.5082	4.11099	0.232325
Datas-XN02-1	26500000	10320000	1565	466	703		0.495838	2.86493	8.87578	0.00283	0.000293009		13563.2	9306.23	9.62351		4162.77		519.075	13.868		301.136	19.9353	3.21862	0.213074
Datas-XN02-2	27620000	12190000	1790	429	669		0.53096	2.76009	7.3391	0.00294	0.000303571		15705.2	11959.1	8.67139		4917.07		512.484	12.7635		386.98	23.0448	4.01559	0.23913
Datas-XN02-3	29100000	11600000	1687	430	640		0.545996	2.91761	7.44105	0.003	0.000293692		16108.6	11392.1	9.33685		4679.08		507.114	13.7144		368.632	22.9029	3.78905	0.235412
Datas-XN02-4	27900000	11380000	1721	559	777		0.482952	2.78905	8.9364	0.00274	0.000295055		11854.4	8581.07	9.12186		4590.34		516.12	12.2138		277.671	10.1697	2.95279	0.108146
Datas-XN02-5	28800000	12450000	1808	362	517		0.574146	3.28905	5.68638	0.00314	0.000354059		18919.9	14561.8	8.57925		5021.94		512.181	12.3018		471.199	27.6589	4.80098	0.281812
Datas-XN02-6	29600000	12640000	1853	472	635		0.52213	2.99612	6.71733	0.0029	0.000322293		14896.3	11343.2	8.67139		5098.58		516.277	12.4281		367.05	20.7322	3.81157	0.21529
Datas-XN02-7	29000000	11380000	1703	484	716		0.513245	3.08354	8.33197	0.00289	0.00030998		13986.2	9880.26	9.34709		4590.34		513.94	13.9258		319.711	18.7254	3.36308	0.196975
Datas-XN02-8	30200000	13060000	1908	382	553		0.554997	2.93495	5.73584	0.00304	0.000316904		18507.7	14521.8	8.41545		5268		514.671	9.82599		469.904	24.271	4.81373	0.248633
Datas-XN02-9	31900000	14630000	2212	555	806		0.555123	2.70255	7.16638	0.00314	0.000319725		13313.6	11151.8	7.88308		5901.29		524.607	9.96231		360.855	18.1299	3.82648	0.192248
Datas-XN02-10	28870000	11680000	1808	563	807		0.522304	2.91011	8.82952	0.00303	0.000306773		11993.9	8780.63	9.01948		4711.35		527.428	11.5416		284.128	13.0145	3.08444	0.141283
Datas-XN02-11	28300000	11120000	1640	470	661		0.610642	3.20404	8.08944	0.00335	0.000314858		13762.5	9973.47	9.11162		4485.46		501.007	8.91942		322.727	16.7907	3.30015	0.171699
Datas-XN02-12	31300000	14370000	2142	560	790		0.559167	2.93241	7.29808	0.00312	0.000342516		12833.1	10876.4	7.79094		5796.41		515.574	9.89709		351.945	18.1533	3.67257	0.189431
Datas-XN02-1	22730000	10700000	978	220	291		1.84407	3.10715	5.97178	0.00633	0.00022567		18070.5	14168.9	8.40871		4891.78		501.857	12.9237		417.852	26.473	4.18163	0.264926
Datas-XN02-2	22160000	10810000	1015	192	284		1.68707	2.61675	5.5497	0.00595	0.000203922		20142.2	16413	8.09121		4947.79		521.291	14.4575		484.034	46.453	5.01006	0.480819
Datas-XN02-3	25500000	12500000	1112	273	389		1.77455	2.48381	6.9208	0.00606	0.000185617		16236.8	13081.7	8.18339		5900.01		497.789	17.7957		385.789	27.7737	3.86834	0.278489
Datas-XN02-4	22600000	11350000	1045	235	355		1.74637	2.66165	6.78115	0.00619	0.000213246		16526	13691.7	7.95806		5381.89		516.547	10.9023		403.78	38.0305	4.19584	0.395191
Datas-XN02-5	21040000	10730000	979	305	447		1.57407	2.38587	9.03801	0.00557	0.00019194		12251.6	10163.5	7.94782		5731.97		505.574	13.1561		299.729	15.7167	3.12371	0.163796
Datas-XN02-6	21660000	10730000	1027	316	466		1.60421	2.3149	8.91433	0.00596	0.000192747		11734.7	9574.28	8.08097		5181.18		531.609	13.2807		282.353	18.5964	3.09081	0.203568
Datas-XN02-7	22600000	11130000	1051	259	355		1.63561	2.31282	6.71422	0.00599	0.000190524		14975.4	12233.8	8.07072		5181.18		536.497	17.3472		360.784	25.8082	3.89188	0.2784
Datas-XN02-8	23100000	11430000	972	205	305		1.66882	2.36269	6.11605	0.00564	0.00017769		18989.7	15318.8	8.17314		5923.35		498.05	13.1902		451.765	35.7051	4.49342	0.355136
Datas-XN02-9	22400000	10960000	974	289	373		1.55219	2.47317	7.61861	0.00552	0.000193281		13029.7	10342.5	8.30629		5577.94		515.624	15.167		305.008	19.5302	3.19245	0.204419
Datas-XN02-10	22280000	10770000	1005	298	439		1.59394	2.42245	8.58875	0.00595	0.000197006		12576.1	9897.01	8.37798		6096.06		535.489	14.7937		291.871	20.8648	3.20699	0.229256
Datas-XN02-1	23600000	9540000	1504	446	669		1.68385	2.14581	8.86327	0.00994	0.000226587		14196.7	10520.5	8.89724		4692.58		500.518	14.8322		313.124	13.465	3.22467	0.138667
Datas-XN02-2	23020000	9310000	1508	420	649		1.66851	2.58114	8.54493	0.01018	0.000282756		14533.9	10845.2	8.83587		5099.08		516.802	14.9312		322.789	17.8862	3.421	0.189562
Datas-XN02-3	24200000	10360000	1632	446	649		1.69909	2.195	7.87785	0.01003	0.000250107		14174.1	11408.6	8.19159		5020.15		505.57	11.8541		339.557	19.7928	3.49458	0.203699
Datas-XN02-4	24670000	10500000	1700	441	646		1.64313	2.19859	7.51547	0.00996	0.000255527		14690.1	11765.1	8.2325		4925.43		521.374	12.1984		350.168	21.0491	3.70251	0.222563
Datas-XN02-5	23500000	9740000	1584	399	567		1.71456	2.28797	7.10929	0.01041	0.000259967		15342.7	12033.7	8.40635		5170.12		523.647	12.6144		358.163	21.1404	3.78701	0.223527
Datas-XN02-6	24450000	10900000	1668	405	568		1.62799	2.13005	6.60772	0.00932	0.000245755		15691.7	13276.5	7.79275		4941.22		497.792	15.5996		395.152	24.6602	3.9494	0.24647
Datas-XN02-7	23300000	9550000	1593	464	640		1.66121	2.30363	7.95313	0.0103	0.000265567		13297	10416.5	8.41658		5256.95		530.06	13.464		310.03	18.4802	3.34888	0.19962
Datas-XN02-8	23450000	10190000	1676	487	685		1.6089	2.07922	7.9407	0.00988	0.000246575		12754.8	10396	8.08933		5221.43		526.556	11.2033		309.419	17.75	3.31961	0.190431
Datas-XN02-9	21970000	9300000	1491	439	646		1.70848	2.5609	8.58682	0.01017	0.000289751		13035	10478.7	8.20182		5185.91		503.956	12.3802		311.879	16.0297	3.22425	0.165717
Datas-XN02-10	22950000	9700000	1574	470	673		1.61341	1.83625	8.41403	0.0097	0.000210038		12780.9	10274.4	8.20182		4889.91		514.182	11.3417		305.8	19.9057	3.21981	0.20959
																	4949.11
Datas-XN02-1	22270000	10480000	802	120	161		1.65232	2.72907	4.04589	0.00478	0.000166511		28416.6	21953	8.54783		4807.03		511.179	17.0485		626.667	81.4085	6.25937	0.813137
Datas-XN02-2	22800000	10600000	851	191	262		1.56237	2.75909	6.15399	0.00473	0.000177078		18122	14033.6	8.52735		4947.79		523.453	17.8964		400.601	33.2676	4.18999	0.347954
Datas-XN02-3	24470000	12640000	961	197	278		1.60504	2.63938	5.74495	0.00461	0.000174401		19296.6	16229	7.85172		5900.01		499.295	19.2018		463.272	41.5246	4.60066	0.412372
Datas-XN02-4	24840000	11530000	918	179	279		1.5173	2.72792	6.19846	0.00457	0.000171442		21466.1	16329.2	8.68091		5381.89		520.94	21.1219		466.132	45.0416	4.85417	0.469051
Datas-XN02-5	25840000	12280000	956	226	334		1.55678	2.86667	6.96419	0.00456	0.00017702		17756.2	13635.7	8.59901		5731.97		501.665	13.9848		389.244	31.408	3.93484	0.317501
Datas-XN02-6	22960000	11100000	890	218	335		1.55512	3.06416	7.51855	0.0047	0.000201835		16263.3	12904.1	8.32262		5181.18		513.435	14.5014		368.358	30.003	3.83438	0.312313
Datas-XN02-7	23300000	11100000	910	264	384		1.57687	2.60642	8.40266	0.00488	0.000175084		13455.3	10623.8	8.36356		5181.18		523.009	16.869		303.267	27.9625	3.24704	0.299392
Datas-XN02-8	25800000	12690000	1002	182	245		1.60634	2.6072	4.85044	0.00478	0.000171906		22072.9	17753.9	8.21001		5923.35		522.24	15.4948		506.801	60.3433	5.21596	0.621049
Datas-XN02-9	23350000	11950000	938	159	225		1.6327	2.82144	4.76386	0.00485	0.000192956		23024.3	19238.8	7.9029		5577.94		520.527	15.4063		549.188	50.0182	5.62845	0.512621
Datas-XN02-10	25730000	13060000	1025	197	279		1.67939	2.58832	5.36954	0.00498	0.000175013		20282.8	16795.8	7.97456		6096.06		517.326	16.1145		479.45	38.1217	4.9146	0.390767
Datas-XN02-1	24800000	11890000	1027	303	432		1.90685	2.59813	8.44574	0.00625	0.000180575		13451.6	10288.8	8.65596		4692.58		514.961	12.793		305.514	21.4488	3.22319	0.226287
Datas-XN02-2	25300000	12920000	1127	337	476		1.8764	2.79623	8.48915	0.00619	0.000208858		12306.3	10055.4	8.1028		5099.08		517.143	16.1395		298.583	15.9342	3.16499	0.168903
Datas-XN02-3	25600000	12720000	1121	344	494		1.99092	2.60064	8.6922	0.00661	0.000192365		12074.9	9706.76	8.23597		5020.15		519.737	11.5168		288.231	18.0302	3.0775	0.192512
Datas-XN02-4	25500000	12480000	1082	341	499		1.95896	2.65562	9.22176	0.0064	0.000190523		12144.3	9619	8.35889		4925.43		508.409	15.6204		285.625	19.7886	3.00024	0.207862
Datas-XN02-5	26600000	13100000	1176	363	510		1.90628	2.6672	8.69777	0.00642	0.000198721		11925.6	9515.75	8.29743		5170.12		527.229	12.1012		282.559	16.3083	3.06086	0.176662
Datas-XN02-6	24600000	12520000	993	271	379		2.08148	2.46115	7.61563	0.00616	0.000166328		14936.2	12313.2	8.03109		4941.22		469.234	12.7748		365.626	30.7197	3.48157	0.292519
Datas-XN02-7	25800000	13320000	1154	379	556		1.89786	2.66632	9.71458	0.00614	0.000199897		11151	9299.48	7.9389		5256.95		501.02	15.9933		276.137	14.602	2.8738	0.151965
Datas-XN02-8	26200000	13230000	1185	379	551		1.88847	2.39608	9.11051	0.00636	0.000182779		11410	9299.48	8.12329		5221.43		526.408	15.0327		276.137	17.5224	3.00018	0.190377
Datas-XN02-9	25800000	13140000	1141	336	495		1.91967	2.75608	8.83563	0.00618	0.00020472		12506	10389.3	7.96963		5185.91		502.824	13.303		308.497	18.2248	3.19113	0.18852
Datas-XN02-10	25800000	12390000	1098	285	429		1.94347	3.03341	7.96585	0.00637	0.000214388		14839.2	11513.6	8.53304		4889.91		515.153	12.1359		341.884	23.8753	3.58944	0.250666
Datas-XN02-11	26200000	12540000	1121	322	486		1.95511	2.58528	8.62992	0.00646	0.00018382		13458.7	10430	8.54328		4949.11		517.88	15.0686		309.707	20.8171	3.29268	0.221319
Datas-XN02-12	25100000	12180000	1069	295	444		2.04288	2.78957	8.29965	0.00662	0.000198922		13933.2	11035.9	8.35889		4807.03		508.269	15.0725		327.698	23.306	3.40663	0.24228
Datas-XN02-1	22200000	11590000	1004	279	432		1.78868	2.25251	8.56748	0.00589	0.000175328		12280.1	10554.3	7.68025		5927.78		533.751	13.2584		312.724	21.7855	3.42446	0.238561
Datas-XN02-2	22400000	11470000	988	319	462		1.90399	2.53048	9.28381	0.00624	0.000190988		10937.4	9180.07	7.86457		5866.4		524.993	16.6256		272.004	16.4816	2.95255	0.178904
Datas-XN02-3	23030000	11720000	973	323	483		1.93822	2.96594	9.93695	0.00609	0.000212259		11128.6	9244.27	7.9465		5994.27		497.442	14.7109		273.906	17.696	2.83677	0.183272
Datas-XN02-4	23140000	12390000	1035	311	476		1.87138	2.35557	9.13271	0.00588	0.000179612		11528.6	10208	7.45496		6336.94		505.343	13.6503		302.46	19.1803	3.15435	0.200031
Datas-XN02-5	22310000	11560000	995	297	436		1.97501	2.51796	8.72079	0.00637	0.000188923		11866.3	10091.1	7.76217		5912.43		519.586	13.1424		298.997	17.5721	3.19213	0.187602
Datas-XN02-6	21990000	11270000	933	269	398		1.94499	2.8337	8.51402	0.006	0.000202996		12811	10880.1	7.77241		5764.11		496.744	16.0445		322.375	23.1511	3.28218	0.235707
Datas-XN02-7	23800000	11850000	1029	288	423		1.95321	2.0762	8.15439	0.00632	0.000151683		13031.4	10769.3	7.98746		6060.76		526.95	16.2746		319.093	24.0162	3.43392	0.25845
Datas-XN02-8	22310000	11260000	984	261	369		1.96859	2.61551	7.52201	0.00638	0.00019194		13515	11226.6	7.9465		5759		528.413	15.0744		332.642	20.2993	3.56518	0.217563
Datas-XN02-9	20100000	10430000	890	220	331		1.91275	2.65379	7.43118	0.00601	0.000194502		14672	12559.9	7.71097		5334.49		512.975	10.8698		372.148	25.4073	3.86763	0.264051
Datas-XN02-10	22090000	11510000	1014	292	429		1.98102	2.31747	8.37628	0.00641	0.000175247		12150.9	10429.4	7.69049		5886.86		524.248	14.4058		309.023	17.5189	3.31641	0.188012
Datas-XN02-11	22710000	11960000	1046	313	464		1.96904	2.16961	8.79836	0.00632	0.00016596		11543.9	10110.4	7.53688		6117.02		518.516	14.3396		299.569	19.9913	3.19433	0.213169
Datas-XN02-12	23460000	12610000	1131	357	515		1.97136	2.51022	9.05189	0.00643	0.000199027		10599.3	9476.2	7.38328		6449.46		523.585	16.5407		280.779	18.5951	3.03183	0.200789
Median	25725000	11190000	1689.5	386	559		0.579712	3.02338	7.13428	0.003465	0.000330847		14681	11400.4	8.32228		5123.63		514.975	13.1117		366.338	22.7625	3.83043	0.23838
