# Supplementary material for: In situLu–Hf geochronology with LA-ICP-MS/MS analysis
Source: Royal Society of Chemistry journal article supplement (doi:10.1039/d2ja00407k), 2023-01-01
Supplement: d2ja00407k2.xlsx [file d2ja00407k2.xlsx]

## Sheet: PlotDat6
Source sheet	Sheet1	0.2	1147.38	1	1371.64	209.904	5	706.85	125.626	0.85	1161.74
Plot name	Average1	20.8	1147.38	2	1464.5	255.859	IsoLine	IsoLine	IsoLine	1.15	1161.74
Plot Type	15			3	916.377	330.393				1.15	1581.54
1st free col	11			4	1544.84	280.816				0.85	1581.54
Sigma Level	2			6	1186.96	231.724				0.85	1161.74
Absolute Errs	TRUE			7	1412.89	337.881				ErrBox	ErrBox
Symbol Type	1			8	1126.37	200.169				1.85	1208.64
Inverse Plot	FALSE			9	1141.06	200.268				2.15	1208.64
Color Plot	TRUE			10	1173.8	229.138				2.15	1720.36
3D plot	FALSE			11	881.94	177.782				1.85	1720.36
Linear	FALSE			12	1091.63	187.67				1.85	1208.64
Data Range	FC2:FD21			13	1568.26	318.395				ErrBox	ErrBox
Filled Symbols	TRUE			14	1034.92	157.229				2.85	585.985
ConcAge	FALSE			15	1104.18	192.936				3.15	585.985
ConcSwap	FALSE			16	1159.18	191.599				3.15	1246.77
1st Symbol-row	1			17	1147.42	180.617				2.85	1246.77
				18	1156.49	203.917				2.85	585.985
				19	1303.46	251.063				ErrBox	ErrBox
				20	872.104	195.247				3.85	1264.03
				IsoLine	IsoLine	IsoLine	IsoLine			4.15	1264.03
										4.15	1825.66
										3.85	1825.66
										3.85	1264.03
										ErrBox	ErrBox
										5.85	955.24
										6.15	955.24
										6.15	1418.69
										5.85	1418.69
										5.85	955.24
										ErrBox	ErrBox
										6.85	1075
										7.15	1075
										7.15	1750.77
										6.85	1750.77
										6.85	1075
										ErrBox	ErrBox
										7.85	926.2
										8.15	926.2
										8.15	1326.54
										7.85	1326.54
										7.85	926.2
										ErrBox	ErrBox
										8.85	940.793
										9.15	940.793
										9.15	1341.33
										8.85	1341.33
										8.85	940.793
										ErrBox	ErrBox
										9.85	944.659
										10.15	944.659
										10.15	1402.94
										9.85	1402.94
										9.85	944.659
										ErrBox	ErrBox
										10.85	704.158
										11.15	704.158
										11.15	1059.72
										10.85	1059.72
										10.85	704.158
										ErrBox	ErrBox
										11.85	903.965
										12.15	903.965
										12.15	1279.3
										11.85	1279.3
										11.85	903.965
										ErrBox	ErrBox
										12.85	1249.87
										13.15	1249.87
										13.15	1886.66
										12.85	1886.66
										12.85	1249.87
										ErrBox	ErrBox
										13.85	877.687
										14.15	877.687
										14.15	1192.15
										13.85	1192.15
										13.85	877.687
										ErrBox	ErrBox
										14.85	911.24
										15.15	911.24
										15.15	1297.11
										14.85	1297.11
										14.85	911.24
										ErrBox	ErrBox
										15.85	967.585
										16.15	967.585
										16.15	1350.78
										15.85	1350.78
										15.85	967.585
										ErrBox	ErrBox
										16.85	966.808
										17.15	966.808
										17.15	1328.04
										16.85	1328.04
										16.85	966.808
										ErrBox	ErrBox
										17.85	952.574
										18.15	952.574
										18.15	1360.41
										17.85	1360.41
										17.85	952.574
										ErrBox	ErrBox
										18.85	1052.4
										19.15	1052.4
										19.15	1554.53
										18.85	1554.53
										18.85	1052.4
										ErrBox	ErrBox
										19.85	676.857
										20.15	676.857
										20.15	1067.35
										19.85	1067.35
										19.85	676.857
										ErrBox	ErrBox
										4.85	581.224
										5.15	581.224
										5.15	832.476
										4.85	832.476
										4.85	581.224
										ErrBox	ErrBox

## Sheet: Table 10
	Table S10 A-ICP-MS data of 12QL59
	Signal intensity (cps)						Contributions			Reaction rate (%)			Ratios				Concentrations (mg g-1)		Single spot Lu-Hf ages			Isochron Lu-Hf ages
Sample names	172Yb	175Lu	176Hf	177Hf	178Hf		pLu(%)	pYb(%)	f176Hf(%)	Lu	Yb		172Yb/177Hf	175Lu/177Hf	Yb/Lu		Lu		Age (Ma)	uncertainty (Ma)		_6/7_LuHf	2s	_6/7_Hf	2s
12QL59-1	80700	39200	12.6	29.1	46.7		0.205096	0	70.3149	-	-		630.384	561.668	7.37907		1.84792		283.046	47.5956		23.4819	3.89564	0.461322	0.0695755
12QL59-2	80100	37800	13.9	33.1	47.5		0	0	63.6278	-	-		602.176	522.74	7.57379		1.78192		413.727	64.7485		21.8545	3.37436	0.513205	0.0720359
12QL59-3	40000	18900	37.4	128	157		0	0.370058	80.0356	-	-		65.2272	56.1668	7.63529		0.890959		578.544	210.564		2.34819	0.413912	0.289494	0.0463897
12QL59-4	28500	14300	90.7	324	479		0	0	100.935	-	-		20.8648	18.5904	7.37907		0.674112		450	51.6566		0.777219	0.0880221	0.316939	0.032631
12QL59-5	88400	45100	15.5	38.9	52.3		0	0	63.8495	-	-		524.567	493.428	6.98962		2.12605		386.739	64.2723		20.629	3.38236	0.455419	0.0678829
12QL59-6	80100	42700	14.5	31.1	46.6		0	0	61.4829	-	-		589.667	580.184	6.68216		2.01291		393.645	64.102		24.2561	3.89693	0.511618	0.0747232
12QL59-7	77400	39200	14.5	26.4	43.3		0	0	57.4568	-	-		680.216	636.106	7.03061		1.84792		474.791	73.4657		26.594	4.05977	0.613284	0.0851112
12QL59-8	95000	50100	12.5	28.1	41.9		0	0	61.2499	-	-		800.006	776.423	6.77439		2.36175		288.236	54.4377		32.4603	6.04839	0.497523	0.0842767
12QL59-9	78300	35900	11.5	29.4	46.3		0	0	76.0975	-	-		615.605	527.968	7.66603		1.69235		223.684	35.3567		22.073	3.44219	0.425222	0.0602832
12QL59-10	76200	37500	12.1	27.8	46.1		0	0	72.9046	-	-		642.856	586.631	7.20484		1.76778		264.506	52.2616		24.5256	4.78082	0.493161	0.0873935
12QL59-11	77500	38500	13.6	30.9	56		0	0	84.5193	-	-		564.915	512.59	7.24584		1.81492		161.941	26.405		21.4301	3.44738	0.461052	0.0674251
12QL59-12	66200	33400	16.2	37.5	55.8		0	0	62.1883	-	-		392.375	371.808	6.93837		1.5745		555.115	69.5159		15.5444	1.92048	0.472129	0.053028
12QL59-13	66000	32100	17	52.5	73.1		0	0	80.7749	-	-		296.529	265.31	7.34832		1.51322		317.352	36.2354		11.092	1.2495	0.377449	0.0386538
12QL59-14	116700	55700	16.9	27.7	45.4		0	0	53.6188	-	-		951.174	865.521	7.22534		2.62574		407.568	56.1056		36.1853	4.91444	0.65638	0.0810409
12QL59-15	83500	39800	12.3	36.1	42.5		0	1.04375	61.2028	-	-		532.402	467.228	7.4918		1.8762		376.77	59.2908		19.5337	3.0327	0.391402	0.0552429
12QL59-16	112800	58600	17.2	31.4	50.8		0.151358	0.952956	56.574	-	-		851.292	824.95	6.78464		2.76245		377.562	64.1088		34.4891	5.7776	0.618713	0.094224
12QL59-17	83300	39800	14.2	34.4	47.2		0	0	61.3334	-	-		551.256	498.083	7.27658		1.8762		400.401	63.4388		20.8236	3.25501	0.445075	0.0632465
12QL59-18	96500	48900	14.5	30.6	40.3		0	0	52.4352	-	-		715.049	685.672	6.85638		2.30518		421.122	75.642		28.6663	5.07997	0.52402	0.08442
12QL59-19	106000	52100	17.5	28.9	43.7		0	0	49.4159	-	-		778.515	713.47	7.17409		2.45603		488.696	91.3383		29.8284	5.50021	0.595597	0.0998409
12QL59-20	129500	58500	18.5	36.3	45.1		0.152012	0	46.9501	-	-		908.933	776.423	7.69678		2.75773		490.107	85.4438		32.4603	5.58313	0.619819	0.0969164
12QL59-21	118400	52900	15.3	25.8	45.7		0.0826947	0	56.9856	-	-		1062.93	894.861	7.80951		2.49374		366.187	67.4468		37.4119	6.79834	0.657044	0.108541
12QL59-22	82900	38800	19	39.1	61		0	0	64.5133	-	-		498.485	429.242	7.63529		1.82906		487.709	74.4263		17.9455	2.70183	0.509732	0.069767
12QL59-23	76700	37800	17.1	39.4	57.4		0	0	63.6065	-	-		439.772	403.029	7.17409		1.78192		487.791	84.6073		16.8496	2.88337	0.466757	0.0726118
12QL59-24	98100	42100	14.2	23.8	41.4		0	0	55.9183	-	-		950.626	765.171	8.16822		1.98462		441.188	75.8007		31.9899	5.42248	0.661247	0.101896
12QL59-25	160300	68900	21.2	32.9	50.9		0.267704	0	45.3441	-	-		1095.96	879.946	8.18872		3.24799		493.21	89.3286		36.7884	6.57362	0.68617	0.111464
12QL59-26	226400	110800	26.5	30.6	44.7		0.363313	0	33.2627	-	-		1784.88	1649.9	7.1126		5.22319		443.656	56.1562		68.9782	8.61387	0.947089	0.107519
12QL59-27	122000	56500	19.2	36.3	44		0	0	42.385	-	-		783.962	676.882	7.61479		2.66345		583.231	88.6431		28.2988	4.24333	0.592908	0.0808228
12QL59-28	101000	45400	18.4	33.6	50.9		0	0	54.5706	-	-		693.15	586.631	7.76852		2.14019		522.087	85.9625		24.5256	3.98401	0.582827	0.0860693
12QL59-29	241000	114000	29.8	47	75		0.314223	0	49.3312	-	-		1111.83	996.166	7.33807		5.37404		364.944	95.2348		41.6472	10.7224	0.618812	0.144834
12QL59-30	144900	71400	15.7	21.4	33.6		0.574269	0	40.8654	-	-		1620.28	1499.91	7.10235		3.36585		376.65	77.1678		62.7075	12.6751	0.824099	0.151433
12QL59-31	164600	76300	20	22.2	36.7		0.0850769	3.48214	38.2108	-	-		1712.03	1512.8	7.44056		3.59684		438.17	84.3418		63.2465	12.0108	0.926258	0.15991
12QL59-32	154000	75300	20.3	40	65.7		0.295037	0	64.1983	-	-		879.979	812.258	7.12285		3.5497		265.609	48.4427		33.9585	6.11039	0.51895	0.0848894
12QL59-33	163700	84700	51	157	258		0.144631	0.353067	97.7596	-	-		254.276	249.041	6.7129		3.99282		41.2266	15.5612		10.4118	3.87729	0.393332	0.133158
12QL59-34	121500	56100	19.3	47.1	58.3		0	1.55483	59.6917	-	-		593.852	517.615	7.54305		2.64459		392.036	56.9554		21.6402	3.10174	0.434368	0.056599
12QL59-35	191000	99880	24.6	35.7	49		0.332754	0	37.5054	-	-		1254.84	1242.28	6.64116		4.70841		453.675	70.6559		51.9365	7.98016	0.77883	0.10879
12QL59-36	176100	89400	22.4	35.1	51.9		0.371907	0	41.7804	-	-		1143.63	1099.93	6.83589		4.21438		414.821	77.6923		45.9855	8.49715	0.676434	0.113628
12QL59-37	111500	54000	31.8	93	151		0	0.867117	84.7857	-	-		236.107	216.38	7.17409		2.5456		267.685	86.7045		9.04632	2.89085	0.327866	0.0952482
12QL59-38	152600	69400	19.7	43.7	64.3		0.231638	0.759576	62.7042	-	-		791.598	694.694	7.4918		3.27157		299.82	42.8704		29.0435	4.09713	0.481183	0.0617091
Median	99550	49500	17.15	34	48.25		0	0	61.2263				686.683	611.368	7.26121		2.33347		403.984	66.0977		25.5598	4.07845	0.512411	0.0843484
