# Supplementary material for: In situLu–Hf geochronology with LA-ICP-MS/MS analysis
Source: Royal Society of Chemistry journal article supplement (doi:10.1039/d2ja00407k), 2023-01-01
Supplement: d2ja00407k3.xlsx [file d2ja00407k3.xlsx]

## Sheet: PlotDat5
Source sheet	MG	0.2	489.231	1	481.438	21.5068	8	449.035	27.6943	0.85	459.931
Plot name	Average2	163.8	489.231	2	466.642	17.8138	72	527.946	26.0578	1.15	459.931
Plot Type	15			3	501.865	27.2954	85	453.077	21.6154	1.15	502.944
1st free col	11			4	499.948	26.0158	107	522.356	21.3811	0.85	502.944
Sigma Level	2			5	502.939	29.5537	113	531.114	26.0711	0.85	459.931
Absolute Errs	TRUE			6	498.71	29.9702	118	449.434	15.3451	ErrBox	ErrBox
Symbol Type	1			7	497.517	20.7323	154	448.097	28.374	1.85	448.828
Inverse Plot	FALSE			9	495.944	26.0684	156	547.167	29.9223	2.15	448.828
Color Plot	TRUE			10	525.596	34.0056	IsoLine	IsoLine	IsoLine	2.15	484.456
3D plot	FALSE			11	514.254	24.0746				1.85	484.456
Linear	FALSE			12	495.846	22.8741				1.85	448.828
Data Range	FD3:FE196			13	463.244	27.8288				ErrBox	ErrBox
Filled Symbols	TRUE			14	465.54	17.1571				2.85	474.57
ConcAge	FALSE			15	466.982	21.8973				3.15	474.57
ConcSwap	FALSE			16	503.471	28.2358				3.15	529.161
1st Symbol-row	1			17	505.536	27.9511				2.85	529.161
				18	481.145	20.3908				2.85	474.57
				19	512.33	26.1246				ErrBox	ErrBox
				20	474.823	26.4285				3.85	473.932
				21	500.118	34.5383				4.15	473.932
				22	493.366	22.0839				4.15	525.963
				23	518.792	24.0752				3.85	525.963
				24	494.949	28.1048				3.85	473.932
				25	514.15	33.6278				ErrBox	ErrBox
				26	480.558	29.3402				4.85	473.386
				27	495.31	21.9659				5.15	473.386
				28	501.231	27.9806				5.15	532.493
				29	503.806	24.925				4.85	532.493
				30	465.151	21.1278				4.85	473.386
				31	495.307	35.1599				ErrBox	ErrBox
				32	475.93	24.7896				5.85	468.74
				33	513.542	30.8663				6.15	468.74
				34	494.008	19.813				6.15	528.68
				35	498.714	19.969				5.85	528.68
				36	483.799	20.0676				5.85	468.74
				37	488.427	18.0401				ErrBox	ErrBox
				38	506.433	18.3268				6.85	476.785
				39	491.803	18.494				7.15	476.785
				40	496.177	20.3902				7.15	518.249
				41	493.096	20.7219				6.85	518.249
				42	470.229	26.4837				6.85	476.785
				43	522.2	24.2794				ErrBox	ErrBox
				44	467.919	29.0274				8.85	469.876
				45	513.632	28.1919				9.15	469.876
				46	496.955	25.5404				9.15	522.013
				47	516.035	30.8143				8.85	522.013
				48	487.143	25.3456				8.85	469.876
				49	512.227	25.0086				ErrBox	ErrBox
				50	496.501	25.3342				9.85	491.59
				51	486.189	18.6046				10.15	491.59
				52	481.053	25.6804				10.15	559.601
				53	451.78	36.5136				9.85	559.601
				54	493.592	30.4726				9.85	491.59
				55	476.342	21.391				ErrBox	ErrBox
				56	492.087	20.9506				10.85	490.179
				57	478.654	20.559				11.15	490.179
				58	508.724	21.7683				11.15	538.328
				59	512.613	21.9454				10.85	538.328
				60	473.522	21.9424				10.85	490.179
				61	490.939	19.4579				ErrBox	ErrBox
				62	505.733	18.9559				11.85	472.972
				63	486.828	19.6773				12.15	472.972
				64	511.853	26.8966				12.15	518.72
				65	464.818	23.7032				11.85	518.72
				66	468.813	15.8913				11.85	472.972
				67	489.703	22.6431				ErrBox	ErrBox
				68	480.427	22.5788				12.85	435.415
				69	478.46	18.4859				13.15	435.415
				70	504.801	23.7192				13.15	491.073
				71	478.359	20.9661				12.85	491.073
				73	477.317	20.1926				12.85	435.415
				74	511.109	21.6855				ErrBox	ErrBox
				75	495.333	25.3796				13.85	448.383
				76	472.133	25.1004				14.15	448.383
				77	495.462	23.0646				14.15	482.697
				78	478.966	21.6267				13.85	482.697
				79	488.971	27.3569				13.85	448.383
				80	493.686	25.9957				ErrBox	ErrBox
				81	493.287	19.3331				14.85	445.085
				82	470.802	13.8641				15.15	445.085
				83	487.601	23.2201				15.15	488.88
				84	501.062	17.168				14.85	488.88
				86	495.805	20.2256				14.85	445.085
				87	465.191	21.9819				ErrBox	ErrBox
				88	498.546	24.2371				15.85	475.235
				89	482.973	22.9115				16.15	475.235
				90	485.704	23.2653				16.15	531.706
				91	491.865	35.3506				15.85	531.706
				92	491.79	26.6917				15.85	475.235
				93	480.446	23.4473				ErrBox	ErrBox
				94	497.683	26.4232				16.85	477.585
				95	492.756	24.9873				17.15	477.585
				96	480.474	19.2492				17.15	533.487
				97	498.798	19.9724				16.85	533.487
				98	483.88	20.071				16.85	477.585
				99	487.668	18.0401				ErrBox	ErrBox
				100	506.518	18.3299				17.85	460.754
				101	491.045	18.4944				18.15	460.754
				102	495.42	20.3911				18.15	501.536
				103	493.18	20.7254				17.85	501.536
				104	478.71	25.0056				17.85	460.754
				105	492.067	28.8991				ErrBox	ErrBox
				106	480.465	20.0509				18.85	486.205
				108	498.569	23.0229				19.15	486.205
				109	474.29	22.9058				19.15	538.455
				110	483.832	19.2936				18.85	538.455
				111	478.803	21.113				18.85	486.205
				112	494.271	21.5172				ErrBox	ErrBox
				114	476.476	24.3042				19.85	448.394
				115	495.617	17.9553				20.15	448.394
				116	493.986	19.8772				20.15	501.252
				117	476.762	17.2445				19.85	501.252
				119	489.603	18.3376				19.85	448.394
				120	491.184	25.0186				ErrBox	ErrBox
				121	470.748	19.313				20.85	465.58
				122	510.849	21.0753				21.15	465.58
				123	486.05	22.5116				21.15	534.657
				124	485.228	26.8372				20.85	534.657
				125	498.892	18.4982				20.85	465.58
				126	498.982	30.9427				ErrBox	ErrBox
				127	468.052	15.8929				21.85	471.282
				128	486.42	17.1185				22.15	471.282
				129	482.519	23.7389				22.15	515.45
				130	483.795	19.8127				21.85	515.45
				131	508.778	19.2965				21.85	471.282
				132	481.9	16.647				ErrBox	ErrBox
				133	478.182	19.0151				22.85	494.717
				134	502.098	23.7152				23.15	494.717
				135	503.274	20.6618				23.15	542.867
				136	496.784	18.23				22.85	542.867
				137	497.782	20.0719				22.85	494.717
				138	488.236	20.665				ErrBox	ErrBox
				139	496.337	23.2717				23.85	466.844
				140	469.634	23.3222				24.15	466.844
				141	469.639	21.398				24.15	523.054
				142	503.321	22.7573				23.85	523.054
				143	497.262	25.4882				23.85	466.844
				144	473.315	20.5159				ErrBox	ErrBox
				145	500.204	17.7413				24.85	480.522
				146	485.539	21.8228				25.15	480.522
				147	499.481	27.8868				25.15	547.778
				148	487.373	21.1926				24.85	547.778
				149	471.541	26.6911				24.85	480.522
				150	486.159	19.3962				ErrBox	ErrBox
				151	490.197	25.261				25.85	451.218
				152	505.864	32.7807				26.15	451.218
				153	490.618	36.0418				26.15	509.898
				155	510.784	25.4636				25.85	509.898
				157	464.916	24.1965				25.85	451.218
				158	509.615	38.1058				ErrBox	ErrBox
				159	492.856	33.3615				26.85	473.344
				160	475.822	30.7587				27.15	473.344
				161	503.866	23.7409				27.15	517.276
				162	492.26	30.6276				26.85	517.276
				163	479.967	28.6008				26.85	473.344
				IsoLine	IsoLine	IsoLine	IsoLine			ErrBox	ErrBox
										27.85	473.25
										28.15	473.25
										28.15	529.212
										27.85	529.212
										27.85	473.25
										ErrBox	ErrBox
										28.85	478.881
										29.15	478.881
										29.15	528.731
										28.85	528.731
										28.85	478.881
										ErrBox	ErrBox
										29.85	444.023
										30.15	444.023
										30.15	486.279
										29.85	486.279
										29.85	444.023
										ErrBox	ErrBox
										30.85	460.147
										31.15	460.147
										31.15	530.466
										30.85	530.466
										30.85	460.147
										ErrBox	ErrBox
										31.85	451.14
										32.15	451.14
										32.15	500.719
										31.85	500.719
										31.85	451.14
										ErrBox	ErrBox
										32.85	482.676
										33.15	482.676
										33.15	544.408
										32.85	544.408
										32.85	482.676
										ErrBox	ErrBox
										33.85	474.195
										34.15	474.195
										34.15	513.821
										33.85	513.821
										33.85	474.195
										ErrBox	ErrBox
										34.85	478.745
										35.15	478.745
										35.15	518.683
										34.85	518.683
										34.85	478.745
										ErrBox	ErrBox
										35.85	463.731
										36.15	463.731
										36.15	503.867
										35.85	503.867
										35.85	463.731
										ErrBox	ErrBox
										36.85	470.387
										37.15	470.387
										37.15	506.467
										36.85	506.467
										36.85	470.387
										ErrBox	ErrBox
										37.85	488.106
										38.15	488.106
										38.15	524.76
										37.85	524.76
										37.85	488.106
										ErrBox	ErrBox
										38.85	473.309
										39.15	473.309
										39.15	510.297
										38.85	510.297
										38.85	473.309
										ErrBox	ErrBox
										39.85	475.787
										40.15	475.787
										40.15	516.567
										39.85	516.567
										39.85	475.787
										ErrBox	ErrBox
										40.85	472.375
										41.15	472.375
										41.15	513.818
										40.85	513.818
										40.85	472.375
										ErrBox	ErrBox
										41.85	443.745
										42.15	443.745
										42.15	496.713
										41.85	496.713
										41.85	443.745
										ErrBox	ErrBox
										42.85	497.92
										43.15	497.92
										43.15	546.479
										42.85	546.479
										42.85	497.92
										ErrBox	ErrBox
										43.85	438.892
										44.15	438.892
										44.15	496.947
										43.85	496.947
										43.85	438.892
										ErrBox	ErrBox
										44.85	485.44
										45.15	485.44
										45.15	541.823
										44.85	541.823
										44.85	485.44
										ErrBox	ErrBox
										45.85	471.415
										46.15	471.415
										46.15	522.495
										45.85	522.495
										45.85	471.415
										ErrBox	ErrBox
										46.85	485.221
										47.15	485.221
										47.15	546.85
										46.85	546.85
										46.85	485.221
										ErrBox	ErrBox
										47.85	461.798
										48.15	461.798
										48.15	512.489
										47.85	512.489
										47.85	461.798
										ErrBox	ErrBox
										48.85	487.218
										49.15	487.218
										49.15	537.235
										48.85	537.235
										48.85	487.218
										ErrBox	ErrBox
										49.85	471.167
										50.15	471.167
										50.15	521.835
										49.85	521.835
										49.85	471.167
										ErrBox	ErrBox
										50.85	467.585
										51.15	467.585
										51.15	504.794
										50.85	504.794
										50.85	467.585
										ErrBox	ErrBox
										51.85	455.373
										52.15	455.373
										52.15	506.734
										51.85	506.734
										51.85	455.373
										ErrBox	ErrBox
										52.85	415.266
										53.15	415.266
										53.15	488.293
										52.85	488.293
										52.85	415.266
										ErrBox	ErrBox
										53.85	463.119
										54.15	463.119
										54.15	524.064
										53.85	524.064
										53.85	463.119
										ErrBox	ErrBox
										54.85	454.951
										55.15	454.951
										55.15	497.733
										54.85	497.733
										54.85	454.951
										ErrBox	ErrBox
										55.85	471.136
										56.15	471.136
										56.15	513.037
										55.85	513.037
										55.85	471.136
										ErrBox	ErrBox
										56.85	458.096
										57.15	458.096
										57.15	499.213
										56.85	499.213
										56.85	458.096
										ErrBox	ErrBox
										57.85	486.956
										58.15	486.956
										58.15	530.493
										57.85	530.493
										57.85	486.956
										ErrBox	ErrBox
										58.85	490.668
										59.15	490.668
										59.15	534.559
										58.85	534.559
										58.85	490.668
										ErrBox	ErrBox
										59.85	451.58
										60.15	451.58
										60.15	495.465
										59.85	495.465
										59.85	451.58
										ErrBox	ErrBox
										60.85	471.481
										61.15	471.481
										61.15	510.397
										60.85	510.397
										60.85	471.481
										ErrBox	ErrBox
										61.85	486.777
										62.15	486.777
										62.15	524.689
										61.85	524.689
										61.85	486.777
										ErrBox	ErrBox
										62.85	467.151
										63.15	467.151
										63.15	506.506
										62.85	506.506
										62.85	467.151
										ErrBox	ErrBox
										63.85	484.956
										64.15	484.956
										64.15	538.749
										63.85	538.749
										63.85	484.956
										ErrBox	ErrBox
										64.85	441.114
										65.15	441.114
										65.15	488.521
										64.85	488.521
										64.85	441.114
										ErrBox	ErrBox
										65.85	452.921
										66.15	452.921
										66.15	484.704
										65.85	484.704
										65.85	452.921
										ErrBox	ErrBox
										66.85	467.06
										67.15	467.06
										67.15	512.346
										66.85	512.346
										66.85	467.06
										ErrBox	ErrBox
										67.85	457.848
										68.15	457.848
										68.15	503.005
										67.85	503.005
										67.85	457.848
										ErrBox	ErrBox
										68.85	459.974
										69.15	459.974
										69.15	496.946
										68.85	496.946
										68.85	459.974
										ErrBox	ErrBox
										69.85	481.082
										70.15	481.082
										70.15	528.52
										69.85	528.52
										69.85	481.082
										ErrBox	ErrBox
										70.85	457.393
										71.15	457.393
										71.15	499.325
										70.85	499.325
										70.85	457.393
										ErrBox	ErrBox
										72.85	457.125
										73.15	457.125
										73.15	497.51
										72.85	497.51
										72.85	457.125
										ErrBox	ErrBox
										73.85	489.423
										74.15	489.423
										74.15	532.794
										73.85	532.794
										73.85	489.423
										ErrBox	ErrBox
										74.85	469.953
										75.15	469.953
										75.15	520.712
										74.85	520.712
										74.85	469.953
										ErrBox	ErrBox
										75.85	447.033
										76.15	447.033
										76.15	497.234
										75.85	497.234
										75.85	447.033
										ErrBox	ErrBox
										76.85	472.398
										77.15	472.398
										77.15	518.527
										76.85	518.527
										76.85	472.398
										ErrBox	ErrBox
										77.85	457.339
										78.15	457.339
										78.15	500.592
										77.85	500.592
										77.85	457.339
										ErrBox	ErrBox
										78.85	461.614
										79.15	461.614
										79.15	516.328
										78.85	516.328
										78.85	461.614
										ErrBox	ErrBox
										79.85	467.69
										80.15	467.69
										80.15	519.682
										79.85	519.682
										79.85	467.69
										ErrBox	ErrBox
										80.85	473.954
										81.15	473.954
										81.15	512.621
										80.85	512.621
										80.85	473.954
										ErrBox	ErrBox
										81.85	456.937
										82.15	456.937
										82.15	484.666
										81.85	484.666
										81.85	456.937
										ErrBox	ErrBox
										82.85	464.381
										83.15	464.381
										83.15	510.821
										82.85	510.821
										82.85	464.381
										ErrBox	ErrBox
										83.85	483.894
										84.15	483.894
										84.15	518.23
										83.85	518.23
										83.85	483.894
										ErrBox	ErrBox
										85.85	475.58
										86.15	475.58
										86.15	516.031
										85.85	516.031
										85.85	475.58
										ErrBox	ErrBox
										86.85	443.21
										87.15	443.21
										87.15	487.173
										86.85	487.173
										86.85	443.21
										ErrBox	ErrBox
										87.85	474.309
										88.15	474.309
										88.15	522.783
										87.85	522.783
										87.85	474.309
										ErrBox	ErrBox
										88.85	460.061
										89.15	460.061
										89.15	505.884
										88.85	505.884
										88.85	460.061
										ErrBox	ErrBox
										89.85	462.439
										90.15	462.439
										90.15	508.969
										89.85	508.969
										89.85	462.439
										ErrBox	ErrBox
										90.85	456.515
										91.15	456.515
										91.15	527.216
										90.85	527.216
										90.85	456.515
										ErrBox	ErrBox
										91.85	465.098
										92.15	465.098
										92.15	518.481
										91.85	518.481
										91.85	465.098
										ErrBox	ErrBox
										92.85	456.999
										93.15	456.999
										93.15	503.893
										92.85	503.893
										92.85	456.999
										ErrBox	ErrBox
										93.85	471.259
										94.15	471.259
										94.15	524.106
										93.85	524.106
										93.85	471.259
										ErrBox	ErrBox
										94.85	467.769
										95.15	467.769
										95.15	517.743
										94.85	517.743
										94.85	467.769
										ErrBox	ErrBox
										95.85	461.225
										96.15	461.225
										96.15	499.723
										95.85	499.723
										95.85	461.225
										ErrBox	ErrBox
										96.85	478.825
										97.15	478.825
										97.15	518.77
										96.85	518.77
										96.85	478.825
										ErrBox	ErrBox
										97.85	463.809
										98.15	463.809
										98.15	503.951
										97.85	503.951
										97.85	463.809
										ErrBox	ErrBox
										98.85	469.628
										99.15	469.628
										99.15	505.708
										98.85	505.708
										98.85	469.628
										ErrBox	ErrBox
										99.85	488.189
										100.15	488.189
										100.15	524.848
										99.85	524.848
										99.85	488.189
										ErrBox	ErrBox
										100.85	472.551
										101.15	472.551
										101.15	509.539
										100.85	509.539
										100.85	472.551
										ErrBox	ErrBox
										101.85	475.029
										102.15	475.029
										102.15	515.811
										101.85	515.811
										101.85	475.029
										ErrBox	ErrBox
										102.85	472.454
										103.15	472.454
										103.15	513.905
										102.85	513.905
										102.85	472.454
										ErrBox	ErrBox
										103.85	453.705
										104.15	453.705
										104.15	503.716
										103.85	503.716
										103.85	453.705
										ErrBox	ErrBox
										104.85	463.168
										105.15	463.168
										105.15	520.966
										104.85	520.966
										104.85	463.168
										ErrBox	ErrBox
										105.85	460.414
										106.15	460.414
										106.15	500.516
										105.85	500.516
										105.85	460.414
										ErrBox	ErrBox
										107.85	475.546
										108.15	475.546
										108.15	521.592
										107.85	521.592
										107.85	475.546
										ErrBox	ErrBox
										108.85	451.384
										109.15	451.384
										109.15	497.196
										108.85	497.196
										108.85	451.384
										ErrBox	ErrBox
										109.85	464.539
										110.15	464.539
										110.15	503.126
										109.85	503.126
										109.85	464.539
										ErrBox	ErrBox
										110.85	457.69
										111.15	457.69
										111.15	499.916
										110.85	499.916
										110.85	457.69
										ErrBox	ErrBox
										111.85	472.753
										112.15	472.753
										112.15	515.788
										111.85	515.788
										111.85	472.753
										ErrBox	ErrBox
										113.85	452.172
										114.15	452.172
										114.15	500.78
										113.85	500.78
										113.85	452.172
										ErrBox	ErrBox
										114.85	477.662
										115.15	477.662
										115.15	513.572
										114.85	513.572
										114.85	477.662
										ErrBox	ErrBox
										115.85	474.108
										116.15	474.108
										116.15	513.863
										115.85	513.863
										115.85	474.108
										ErrBox	ErrBox
										116.85	459.517
										117.15	459.517
										117.15	494.006
										116.85	494.006
										116.85	459.517
										ErrBox	ErrBox
										118.85	471.266
										119.15	471.266
										119.15	507.941
										118.85	507.941
										118.85	471.266
										ErrBox	ErrBox
										119.85	466.165
										120.15	466.165
										120.15	516.202
										119.85	516.202
										119.85	466.165
										ErrBox	ErrBox
										120.85	451.435
										121.15	451.435
										121.15	490.061
										120.85	490.061
										120.85	451.435
										ErrBox	ErrBox
										121.85	489.773
										122.15	489.773
										122.15	531.924
										121.85	531.924
										121.85	489.773
										ErrBox	ErrBox
										122.85	463.538
										123.15	463.538
										123.15	508.562
										122.85	508.562
										122.85	463.538
										ErrBox	ErrBox
										123.85	458.39
										124.15	458.39
										124.15	512.065
										123.85	512.065
										123.85	458.39
										ErrBox	ErrBox
										124.85	480.394
										125.15	480.394
										125.15	517.39
										124.85	517.39
										124.85	480.394
										ErrBox	ErrBox
										125.85	468.039
										126.15	468.039
										126.15	529.924
										125.85	529.924
										125.85	468.039
										ErrBox	ErrBox
										126.85	452.159
										127.15	452.159
										127.15	483.945
										126.85	483.945
										126.85	452.159
										ErrBox	ErrBox
										127.85	469.302
										128.15	469.302
										128.15	503.539
										127.85	503.539
										127.85	469.302
										ErrBox	ErrBox
										128.85	458.78
										129.15	458.78
										129.15	506.258
										128.85	506.258
										128.85	458.78
										ErrBox	ErrBox
										129.85	463.983
										130.15	463.983
										130.15	503.608
										129.85	503.608
										129.85	463.983
										ErrBox	ErrBox
										130.85	489.481
										131.15	489.481
										131.15	528.074
										130.85	528.074
										130.85	489.481
										ErrBox	ErrBox
										131.85	465.253
										132.15	465.253
										132.15	498.547
										131.85	498.547
										131.85	465.253
										ErrBox	ErrBox
										132.85	459.167
										133.15	459.167
										133.15	497.197
										132.85	497.197
										132.85	459.167
										ErrBox	ErrBox
										133.85	478.382
										134.15	478.382
										134.15	525.813
										133.85	525.813
										133.85	478.382
										ErrBox	ErrBox
										134.85	482.612
										135.15	482.612
										135.15	523.936
										134.85	523.936
										134.85	482.612
										ErrBox	ErrBox
										135.85	478.554
										136.15	478.554
										136.15	515.014
										135.85	515.014
										135.85	478.554
										ErrBox	ErrBox
										136.85	477.71
										137.15	477.71
										137.15	517.854
										136.85	517.854
										136.85	477.71
										ErrBox	ErrBox
										137.85	467.571
										138.15	467.571
										138.15	508.901
										137.85	508.901
										137.85	467.571
										ErrBox	ErrBox
										138.85	473.066
										139.15	473.066
										139.15	519.609
										138.85	519.609
										138.85	473.066
										ErrBox	ErrBox
										139.85	446.312
										140.15	446.312
										140.15	492.957
										139.85	492.957
										139.85	446.312
										ErrBox	ErrBox
										140.85	448.241
										141.15	448.241
										141.15	491.037
										140.85	491.037
										140.85	448.241
										ErrBox	ErrBox
										141.85	480.564
										142.15	480.564
										142.15	526.078
										141.85	526.078
										141.85	480.564
										ErrBox	ErrBox
										142.85	471.774
										143.15	471.774
										143.15	522.75
										142.85	522.75
										142.85	471.774
										ErrBox	ErrBox
										143.85	452.799
										144.15	452.799
										144.15	493.831
										143.85	493.831
										143.85	452.799
										ErrBox	ErrBox
										144.85	482.463
										145.15	482.463
										145.15	517.945
										144.85	517.945
										144.85	482.463
										ErrBox	ErrBox
										145.85	463.716
										146.15	463.716
										146.15	507.361
										145.85	507.361
										145.85	463.716
										ErrBox	ErrBox
										146.85	471.594
										147.15	471.594
										147.15	527.368
										146.85	527.368
										146.85	471.594
										ErrBox	ErrBox
										147.85	466.18
										148.15	466.18
										148.15	508.565
										147.85	508.565
										147.85	466.18
										ErrBox	ErrBox
										148.85	444.85
										149.15	444.85
										149.15	498.232
										148.85	498.232
										148.85	444.85
										ErrBox	ErrBox
										149.85	466.763
										150.15	466.763
										150.15	505.555
										149.85	505.555
										149.85	466.763
										ErrBox	ErrBox
										150.85	464.936
										151.15	464.936
										151.15	515.458
										150.85	515.458
										150.85	464.936
										ErrBox	ErrBox
										151.85	473.084
										152.15	473.084
										152.15	538.645
										151.85	538.645
										151.85	473.084
										ErrBox	ErrBox
										152.85	454.576
										153.15	454.576
										153.15	526.659
										152.85	526.659
										152.85	454.576
										ErrBox	ErrBox
										154.85	485.32
										155.15	485.32
										155.15	536.247
										154.85	536.247
										154.85	485.32
										ErrBox	ErrBox
										156.85	440.719
										157.15	440.719
										157.15	489.112
										156.85	489.112
										156.85	440.719
										ErrBox	ErrBox
										157.85	471.509
										158.15	471.509
										158.15	547.721
										157.85	547.721
										157.85	471.509
										ErrBox	ErrBox
										158.85	459.495
										159.15	459.495
										159.15	526.218
										158.85	526.218
										158.85	459.495
										ErrBox	ErrBox
										159.85	445.063
										160.15	445.063
										160.15	506.58
										159.85	506.58
										159.85	445.063
										ErrBox	ErrBox
										160.85	480.125
										161.15	480.125
										161.15	527.606
										160.85	527.606
										160.85	480.125
										ErrBox	ErrBox
										161.85	461.632
										162.15	461.632
										162.15	522.888
										161.85	522.888
										161.85	461.632
										ErrBox	ErrBox
										162.85	451.366
										163.15	451.366
										163.15	508.568
										162.85	508.568
										162.85	451.366
										ErrBox	ErrBox
										7.85	421.341
										8.15	421.341
										8.15	476.73
										7.85	476.73
										7.85	421.341
										ErrBox	ErrBox
										71.85	501.888
										72.15	501.888
										72.15	554.004
										71.85	554.004
										71.85	501.888
										ErrBox	ErrBox
										84.85	431.461
										85.15	431.461
										85.15	474.692
										84.85	474.692
										84.85	431.461
										ErrBox	ErrBox
										106.85	500.975
										107.15	500.975
										107.15	543.737
										106.85	543.737
										106.85	500.975
										ErrBox	ErrBox
										112.85	505.043
										113.15	505.043
										113.15	557.185
										112.85	557.185
										112.85	505.043
										ErrBox	ErrBox
										117.85	434.089
										118.15	434.089
										118.15	464.779
										117.85	464.779
										117.85	434.089
										ErrBox	ErrBox
										153.85	419.723
										154.15	419.723
										154.15	476.47
										153.85	476.47
										153.85	419.723
										ErrBox	ErrBox
										155.85	517.245
										156.15	517.245
										156.15	577.09
										155.85	577.09
										155.85	517.245
										ErrBox	ErrBox

## Sheet: Table S2
	Table S2 A-ICP-MS data of MG-1
	Signal intensity (cps)						Contributions				Reaction rate (%)			Ratios				Concentrations (mg g-1)		Single spot Lu-Hf ages			Isochron Lu-Hf ages
Sample names	172Yb	175Lu	176Hf	177Hf	178Hf		pLu(%)	pYb(%)	f176Hf(%)		Lu	Yb		172Yb/177Hf	175Lu/177Hf	Yb/Lu		Lu		Age (Ma)	uncertainty (Ma)		_6/7_LuHf	2s	_6/7_Hf	2s
MG-1	7100000	2406000	353	19.1	23		0.647209	4.57676	1.30096		0.00357	0.000388908		95037.2	59336.4	10.5088		1135.13		481.438	21.5068		1902.45	359.393	17.4043	3.28784
MG-2	6110000	2123000	302.9	7.8	15		0.698516	5.46765	1.0098		0.00376	0.000463668		201868	128803	10.2831		1001.61		466.642	17.8138		4129.72	1806.39	36.505	15.9677
MG-3	6060000	2110000	317	9.5	8.6		0.776267	3.72287	0.610768		0.0044	0.000333102		154759	99640.4	10.1907		995.476		501.865	27.2954		3194.69	1486.38	30.2617	14.0797
MG-4	6430000	2044000	313	13.8	20.5		0.762675	5.3213	1.32183		0.00441	0.000443038		122883	72341.7	11.1451		964.337		499.948	26.0158		2319.43	1104.01	22.0441	10.4926
MG-5	6750000	2360000	360	11.8	20		0.602854	3.96077	0.988768		0.00344	0.000360771		149293	97795.2	10.0162		1113.42		502.939	29.5537		3135.53	1301.67	29.8788	12.4038
MG-6	7050000	2450000	370	9.5	14.1		0.63652	4.6315	0.771459		0.00362	0.000415225		180804	117354	10.1086		1155.88		498.71	29.9702		3762.63	2155.56	35.4735	20.3223
MG-7	6750000	2410000	366	12.3	14.1		0.59432	4.89959	0.773306		0.00338	0.000453409		142674	96017.1	9.74942		1137.01		497.517	20.7323		3078.52	1317.5	28.9545	12.3916
MG-8	3640000	1311000	244	235	347		0.542842	4.12429	28.0961		0.00381	0.000474649		3901.74	2653.74	9.64679		618.516		449.035	27.6943		85.0846	10.064	0.996165	0.117829
MG-9	6560000	2280000	346	13.2	17.3		0.73147	4.86772	0.985237		0.00416	0.000436742		123393	81245.3	9.96493		1075.68		495.944	26.0684		2604.9	1122.98	24.4743	10.5509
MG-10	2830000	1091000	228	211	288		0.528309	3.20523	24.9169		0.00412	0.000438462		3350.13	2456.25	8.94894		514.722		525.596	34.0056		78.7528	12.7275	1.03445	0.167181
MG-11	6490000	2250000	356	11.8	15.2		0.725866	4.95555	0.866182		0.00428	0.000465035		136149	91050.7	9.81099		1061.53		514.254	24.0746		2919.28	1466.82	28.4125	14.2761
MG-12	5960000	2080000	322	16.4	31.4		0.676701	5.21993	2.00286		0.0039	0.000474541		86640.9	57401.6	9.90335		981.322		495.846	22.8741		1840.42	717.518	17.4677	6.81009
MG-1	4810000	1385000	220	25.9	37.3		0.669716	8.49228	3.54843		0.004	0.000665898		48765.5	26185.9	12.3007		608.172		463.244	27.8288		868.876	204.205	7.8261	1.83931
MG-2	4950000	1416000	225.2	30	41.4		0.635201	7.92523	3.85401		0.0038	0.000623377		41847.7	22508.7	12.2802		621.785		465.54	17.1571		746.863	200.005	6.78213	1.8162
MG-3	5530000	1530000	244	36.7	48.6		0.716461	7.61331	4.11169		0.0043	0.000573003		39046.7	20112.3	12.8235		671.844		466.982	21.8973		667.349	98.0522	6.0953	0.895569
MG-4	5160000	1500000	252	29.5	48.2		0.697141	5.49828	3.87043		0.0044	0.000458902		44827.2	24375.8	12.1469		658.67		503.471	28.2358		808.815	160.489	7.94807	1.5771
MG-5	4950000	1459000	238	35.9	39		0.566713	3.76472	3.25967		0.0035	0.000312684		35060.5	19375.6	11.9522		640.667		505.536	27.9511		642.904	174.201	6.30371	1.70805
MG-6	4950000	1484000	241	35.5	39.5		0.571189	7.55346	3.42022		0.0035	0.000631547		35071.4	19737.1	11.7369		651.644		481.145	20.3908		654.899	164.574	6.1199	1.53791
MG-7	5180000	1488000	249	30	47.7		0.567776	4.39354	3.86715		0.0036	0.000364943		43223.6	23405.1	12.1982		653.401		512.33	26.1246		776.606	166.931	7.7664	1.66938
MG-8	5230000	1482000	239	36.7	51.8		0.622114	7.3657	4.53927		0.0038	0.000579096		35670.1	19027.1	12.3827		650.766		474.823	26.4285		631.341	152.947	5.89004	1.42691
MG-9	4800000	1405000	221	30.5	38		0.605853	4.38396	3.34178		0.00373	0.000364877		39896.4	22413.3	11.7574		616.954		500.118	34.5383		743.699	173.959	7.21953	1.68872
MG-10	5290000	1547000	251	36.8	49		0.590076	5.53316	3.96295		0.00365	0.00045614		35828.9	19885.5	11.9009		679.308		493.366	22.0839		659.823	169.797	6.35917	1.63645
MG-11	5400000	1488000	254	37.7	42.7		0.58041	5.91048	3.42412		0.00377	0.000480769		36177.6	18891.2	12.6492		653.401		518.792	24.0752		626.832	88.9789	6.31902	0.896987
MG-1	6720000	2235000	359	31	44		0.60259	5.78028	2.50876		0.00366	0.000529801		55300.6	34323.4	10.6225		1074.95		494.949	28.1048		1113.76	496.06	10.6076	4.72452
MG-2	6040000	2135000	348	43	48		0.737192	3.23957	2.80296		0.00455	0.000320423		38097.1	25170.5	9.97905		1026.86		514.15	33.6278		816.761	550.478	8.10694	5.46389
MG-3	6200000	2160000	328	21.8	25		0.713471	3.28127	1.4846		0.00406	0.000296167		77052.1	50341	10.0914		1038.88		480.558	29.3402		1633.52	525.071	14.9459	4.80414
MG-4	7010000	2380000	374	17.7	20.5		0.701948	4.63281	1.11464		0.00416	0.00042517		103383	66072.6	10.3161		1144.69		495.31	21.9659		2144	700.271	20.1465	6.58023
MG-5	6960000	2422000	402	76	93		0.556162	4.79457	4.64651		0.00346	0.000472715		23747.3	15546.5	10.071		1164.9		501.231	27.9806		504.47	565.386	4.97504	5.57579
MG-6	7820000	2600000	425	20.5	22.7		0.655751	5.11315	1.079		0.00397	0.000468439		99324.5	62186	10.5306		1250.51		503.806	24.925		2017.88	516.924	19.2816	4.93941
MG-7	6930000	2400000	359	17.3	21.9		0.692606	5.175	1.24139		0.00388	0.000455172		102618	66909	10.1118		1154.31		465.151	21.1278		2171.14	658.269	19.1772	5.81435
MG-8	7390000	2580000	441	17.3	27.3		0.633589	4.55572	1.22233		0.00406	0.000463576		108113	71429.8	9.97905		1240.89		535.527	25.683		2317.83	613.824	23.5851	6.24596
MG-9	7990000	2735000	433	30.5	21.4		0.635087	4.95481	1.01121		0.00377	0.000452703		67657.7	43326.3	10.2957		1315.44		495.307	35.1599		1405.9	451.666	13.1969	4.23971
MG-10	8010000	2647000	410	18.1	31.4		0.690993	5.76676	1.58777		0.004	0.00050165		113868	71429.8	10.5102		1273.11		475.93	24.7896		2317.83	579.723	21.0237	5.25831
MG-11	5800000	1920000	319	16.2	20.5		0.677783	4.60428	1.27431		0.00417	0.000428571		93756.4	59391.1	10.408		923.451		513.542	30.8663		1927.19	565.804	18.8101	5.52248
MG-12	7710000	2551000	404	24.3	19.5		0.586751	4.65058	0.979233		0.00346	0.000411184		81807.9	51318.5	10.5102		1226.94		494.008	19.813		1665.24	422.446	15.5851	3.9537
MG-1	6560000	2192000	322	36.4	51.4		0.756731	4.80785	3.20093		0.00422	0.000407346		43033.8	25282.7	11.1992		877.6		498.714	19.969		849.888	145.619	8.21568	1.40767																					0.002	62000	6100
MG-2	7050000	2337000	327	17.1	17.8		0.613213	5.05153	1.10099		0.00325	0.000405046		100483	58712.1	11.2608		935.653		483.799	20.0676		1973.63	433.258	18.1118	3.97598																					0.0023	59600	6100
MG-3	7560000	2557000	366	33.1	44.2		0.626193	5.13363	2.43728		0.0034	0.000429054		54431.3	32820.4	10.9121		1023.73		488.427	18.0401		1103.27	186.159	10.362	1.74842																					0.00083	72700	6900
MG-4	7620000	2628000	383	16.4	15.8		0.689974	4.50607	0.840125		0.0038	0.000388851		112382	69527.5	10.6352		1052.16		506.433	18.3268		2337.19	569.608	22.3987	5.45889																					0.0025	58100	6200
MG-5	7530000	2477000	353	17.2	28.9		0.603451	4.20946	1.63256		0.00324	0.00034106		100445	60736.7	10.8813		991.704		491.803	18.494		2041.68	463.654	19.1511	4.3491																					19000	61200	6600
MG-6	7560000	2692000	391	22.8	27.8		0.775395	4.02706	1.40447		0.00419	0.000353571		76977.9	50808.6	9.96854		1077.78		496.177	20.3902		1707.95	344.742	16.1266	3.25509																					0.0061	61500	5500
MG-7	7560000	2555000	371	35	44		0.642564	4.67487	2.26815		0.0035	0.000395499		51400.7	32617.9	10.3685		1022.93		493.096	20.7219		1096.46	392.808	10.3791	3.71833																					0.008	58300	4800
MG-1	5000000	1478000	221	53	86		0.517075	4.30932	7.86055		0.00292	0.000328111		23633.9	13014.2	11.9902		655.065		470.229	26.4837		415.255	79.7276	3.97374	0.762946
MG-2	5330000	1537000	254	50	90		0.590446	4.52876	7.20365		0.00369	0.000371758		26592	14277.1	12.2976		681.215		522.2	24.2794		455.549	62.5768	4.80972	0.660689
MG-3	5320000	1588000	236	60	66		0.656187	5.3678	5.74636		0.00365	0.00040597		22218.9	12404.7	11.8262		703.818		467.919	29.0274		395.805	85.0311	3.68438	0.791517
MG-4	5430000	1627000	263	58.2	92		0.45394	3.89182	6.94163		0.00276	0.000322388		23518.8	13176.1	11.7852		721.103		513.632	28.1919		420.42	66.3261	4.35327	0.686779
MG-5	5650000	1702000	268	66	80.5		0.632715	4.34222	6.04857		0.00371	0.000348872		21226.1	12038.2	11.6417		754.344		496.955	25.5404		384.111	77.1148	3.81087	0.765077
MG-6	5760000	1731000	283	64	94		0.513206	3.98996	6.64126		0.00313	0.000334337		22244.9	12671.7	11.5905		767.197		516.035	30.8143		404.327	82.1594	4.19281	0.851981
MG-7	6270000	1728000	275	65	84		0.476755	6.34345	6.24402		0.0028	0.000467033		24426.9	12732.7	12.6665		765.868		487.143	25.3456		406.271	79.6333	3.95894	0.775992
MG-8	6020000	1767000	289	72	97		0.492939	3.21213	6.65731		0.00296	0.000258065		20933.7	11666.9	11.8467		783.153		512.227	25.0086		372.266	65.0032	3.83234	0.669184
MG-9	5890000	1772000	287	78.2	100		0.48402	4.65718	7.01032		0.00287	0.000378378		18727.4	10744	11.5085		785.369		496.501	25.3342		342.817	46.463	3.4332	0.465311
MG-10	5720000	1736000	273	60	78		0.415906	4.59275	5.78602		0.00238	0.000364631		23930.4	13902.3	11.365		769.413		486.189	18.6046		443.593	93.6175	4.29313	0.90604
MG-12	5960000	1764000	257	62	83		0.733396	5.32996	6.50163		0.0039	0.000381657		23766.8	13443.6	11.6725		781.823		443.705	21.2703		428.956	76.4448	3.81586	0.680029
MG-1	5180000	1486000	237	58.6	75		0.645215	5.45594	6.38483		0.00392	0.000437681		22718.9	12281.5	12.2014		741.592		481.053	25.6804		404.416	61.405	3.89767	0.591808
MG-2	5810000	1512000	230	55	71		0.707297	6.85871	6.43919		0.0041	0.000471354		27250.3	13202.6	13.614		754.568		451.78	36.5136		434.747	132.3	3.93596	1.19777
MG-3	5550000	1493000	244	43.3	79		0.73684	5.11451	6.55371		0.00459	0.000379581		33393.1	16400.7	13.4297		745.086		493.592	30.4726		540.059	64.9598	5.35107	0.643643
MG-4	5390000	1519000	244	56.1	76.7		0.732636	5.81382	6.42837		0.00443	0.000451977		25061.5	13302.4	12.4266		758.061		476.342	21.391		438.032	54.944	4.18203	0.524567
MG-5	5170000	1548000	252	48.1	67		0.63625	4.88262	5.40976		0.00389	0.00040743		27112.1	15351.8	11.6486		772.534		492.087	20.9506		505.52	95.9453	4.9331	0.93628
MG-6	5380000	1579000	253	55.3	81		0.767366	5.27062	6.47809		0.00464	0.000424225		24397.6	13541.1	11.8841		788.004		478.654	20.559		445.895	56.934	4.28015	0.546511
MG-7	5610000	1614000	276	57.1	95		0.682076	4.75346	6.96131		0.00438	0.00039954		23817.8	13039.6	12.0479		805.471		508.724	21.7683		429.38	61.0073	4.40486	0.625853
MG-8	5440000	1500000	256.6	50.3	74.4		0.600858	5.48488	5.87924		0.00387	0.000443526		26657.4	14045.3	12.5187		748.579		512.613	21.9454		462.497	80.3091	4.72612	0.820655
MG-9	5320000	1539000	244.5	58.3	70.6		0.630502	5.94662	5.90264		0.00377	0.000472303		22547.6	12634.1	11.7715		768.042		473.522	21.9424		416.026	59.4744	3.92623	0.561286
MG-10	5260000	1559000	256	59.1	79		0.735149	4.95633	6.20179		0.00453	0.000411974		21906.7	12514.3	11.5463		778.023		490.939	19.4579		412.083	56.191	4.04574	0.551672
MG-11	5430000	1546000	264	60.6	81.1		0.584743	5.01383	6.22584		0.00371	0.00041287		22164	12196.4	11.9864		771.535		505.733	18.9559		401.614	43.1084	4.06353	0.436171
MG-12	5300000	1521000	249	52	80		0.725068	4.95107	6.4223		0.00444	0.000394286		24994.4	13824.7	11.925		759.059		486.828	19.6773		455.233	77.8061	4.44219	0.759236
MG-1	5110000	1512000	259	103	154		0.514572	4.86903	11.4649		0.00329	0.000418879		12905.9	7062.05	12.0211		713.09		511.853	26.8966		224.108	50.8565	2.43064	0.551582
MG-2	5040000	1484000	226	68.6	101		0.639554	6.12041	9.16002		0.00367	0.00047142		18487.9	10107.9	12.0313		699.885		464.818	23.7032		320.765	39.5904	3.07747	0.379836
MG-3	5750000	1740000	262	71	104		0.731555	5.26732	8.0662		0.00415	0.000411996		20870.8	11770.1	11.6639		820.62		468.813	15.8913		373.513	61.2162	3.5715	0.585344
MG-4	5440000	1617000	267	95	152		0.653175	6.3928	11.3529		0.00406	0.000541106		14379.5	8025.06	11.7864		762.61		489.703	22.6431		254.668	39.8411	2.63856	0.412785
MG-5	5400000	1585000	244	60	95		0.690914	5.2598	7.94888		0.00401	0.000407625		22278.4	12232.2	11.9803		747.518		480.427	22.5788		388.177	58.997	3.79933	0.577439
MG-6	5320000	1608000	246	63.3	90		0.627768	5.55702	7.50088		0.00362	0.000441221		21004.8	11929.1	11.5823		758.366		478.46	18.4859		378.56	45.4684	3.67208	0.441049
MG-7	5360000	1619000	261	62.6	99		0.603148	5.40929	7.65283		0.00367	0.000452762		21206.6	12065	11.5619		763.553		504.801	23.7192		382.872	49.4788	3.92599	0.507358
MG-8	5610000	1636000	246.3	55.7	87		0.56196	5.60959	7.2291		0.00323	0.000428571		24650.5	13580.9	11.9394		771.571		478.359	20.9661		430.976	65.2007	4.16738	0.630467
MG-9	5540000	1654000	272	66.1	96		0.645099	4.38157	7.10656		0.00404	0.000372024		20852.5	11770.1	11.6537		780.06		527.946	26.0578		373.513	39.5551	3.98312	0.421813
MG-10	5570000	1674000	256	66.7	95		0.756387	6.17203	7.59779		0.00439	0.000490373		20245.4	11589.8	11.4904		789.493		477.317	20.1926		367.792	44.7447	3.56279	0.43344
MG-11	5410000	1633000	260	62.8	93.9		0.671563	4.62622	7.05311		0.00408	0.000385542		21048.6	12092.6	11.4496		770.156		511.109	21.6855		383.746	49.705	3.9587	0.512753
MG-12	5620000	1700000	266	62.2	98		0.689839	5.47907	7.54178		0.00412	0.000450151		21736.7	12521.4	11.419		801.755		495.333	25.3796		397.354	55.4243	3.99283	0.556935
MG-1	5340000	1527000	197	37.5	54		0.596143	5.36505	5.50423		0.00295	0.000345714		31269.6	16845.7	12.2259		727.195		472.133	25.1004		525.226	85.7613	4.92012	0.80338
MG-2	5260000	1546000	212	54.2	67		0.509002	5.55827	6.31747		0.00267	0.000385061		22003.2	11994.4	12.0824		736.244		495.462	23.0646		373.971	53.0225	3.70919	0.525899
MG-3	5500000	1647000	221	50.8	66.9		0.633472	5.58773	6.12159		0.00321	0.000385305		24540.2	13810.8	11.7032		784.342		478.966	21.6267		430.603	74.5153	4.11933	0.712844
MG-4	5650000	1694000	231	50.6	83		0.649338	4.01185	7.10876		0.00334	0.000280597		25154	14181.1	11.6827		806.725		488.971	27.3569		442.148	63.7408	4.3645	0.629194
MG-5	5860000	1737000	246	61.4	86		0.78227	5.4961	7.06124		0.00413	0.000391691		21583.1	12104.2	11.7442		827.203		493.686	25.9957		377.394	50.7577	3.7595	0.505635
MG-6	5910000	1727000	246	56.7	75.7		0.653245	5.46732	6.23024		0.00341	0.000379895		23751.2	13125.4	11.9184		822.44		493.287	19.3331		409.233	57.1438	4.03727	0.56375
MG-7	5770000	1757000	246.9	61.4	90		0.658256	5.7287	7.41406		0.00333	0.000401826		21611.6	12446	11.4368		836.727		470.802	13.8641		388.049	47.9555	3.69956	0.457196
MG-8	6040000	1802000	265	61.4	112		0.785426	5.68618	8.31982		0.00416	0.000407132		22757.6	12807.6	11.7032		858.157		487.601	23.2201		399.325	64.083	3.98261	0.639123
MG-9	5800000	1753000	265	63.3	96		0.775531	5.66869	7.43339		0.00418	0.000419686		21696.1	12416.8	11.5085		834.822		501.062	17.168		387.139	51.14	3.93026	0.519176
MG-10	5870000	1772000	243	46.7	71.9		0.910848	6.65268	6.18592		0.00443	0.000443975		29597.1	16953.6	11.4983		843.871		453.077	21.6154		528.593	80.5084	4.78531	0.728836
MG-11	5780000	1755000	262	63.6	89		0.779123	5.32083	6.9854		0.00412	0.000389058		21360.3	12301.2	11.4368		835.775		495.805	20.2256		383.537	60.2315	3.83406	0.602109
MG-1	4290000	1256000	185.7	43.6	69.7		0.566588	5.34321	7.56249		0.00314	0.000394737		25092.2	13660.5	12.0673		793.929		465.191	21.9819		425.261	61.3662	4.01242	0.579003																						-193.4	4.5
MG-2	4250000	1207000	188.1	42.6	58.6		0.709933	4.96022	6.28948		0.00415	0.000377574		25083.5	13350	12.3437		762.956		498.546	24.2371		415.596	63.2973	4.14684	0.631584																						-80	240
MG-3	4340000	1346000	205	49.7	70		0.801222	5.47631	6.99208		0.0046	0.000443273		22367.4	12957.4	11.3406		850.819		482.973	22.9115		403.372	56.3159	3.92792	0.548388																						-135.2	4.8
MG-4	4660000	1354000	208	48.1	72.5		0.629509	5.79171	7.23229		0.00365	0.000443478		24337.5	13249.6	12.0673		855.876		485.704	23.2653		412.471	68.1221	4.04982	0.668851																						0	190
MG-5	4170000	1190000	188	41.4	59		0.871919	6.31993	6.66311		0.00513	0.000480114		24403.3	13085.7	12.2516		752.21		491.865	35.3506		407.366	67.5725	4.02601	0.667821																						300	450
MG-6	4630000	1350000	206.1	45.7	59.4		0.737127	5.28475	6.1579		0.00426	0.000398281		25440.3	13803.2	12.1083		853.348		491.79	26.6917		429.702	68.9202	4.22324	0.677368																						-18.3	0.94
MG-7	4920000	1483000	228	59.4	89.2		0.692827	6.68763	8.05427		0.00405	0.000530868		20636.8	11774.2	11.5146		937.418		480.446	23.4473		366.539	46.5006	3.59149	0.455631																						570	360
MG-8	5130000	1499000	230	55.3	75		0.69512	4.98895	6.58996		0.00407	0.00039233		22279.7	12677.7	11.5453		947.532		497.683	26.4232		394.666	54.9684	3.94379	0.549284																						270	220
MG-9	5240000	1555000	238	50.6	81		0.828337	5.48395	6.91048		0.00485	0.000432849		24665	14173.2	11.4327		982.93		492.756	24.9873		441.222	64.7381	4.38016	0.642676																						126.8	4.9
MG-10	5000000	1474000	221.2	49.1	66		0.761938	6.52931	6.16029		0.00436	0.000498534		24427.3	13912.1	11.5351		931.729		480.474	19.2492		433.094	53.4643	4.15822	0.513321																						137.4	3.5
MG-1	6560000	2192000	322	36.4	51.4		0.756731	4.80785	3.20093		0.00422	0.000407346		43029.3	25280.6	11.1992		877.6		498.798	19.9724		849.741	145.594	8.21565	1.40766
MG-2	7050000	2337000	327	17.1	17.8		0.613213	5.05153	1.10099		0.00325	0.000405046		100473	58707.1	11.2608		935.653		483.88	20.071		1973.29	433.184	18.1118	3.97597
MG-3	7560000	2557000	366	33.1	44.2		0.627191	5.14187	2.44141		0.0034	0.000429054		54425.6	32817.6	10.9121		1023.73		487.668	18.0401		1103.08	186.126	10.3445	1.74547
MG-4	7620000	2628000	383	16.4	15.8		0.689974	4.50607	0.840125		0.0038	0.000388851		112371	69521.5	10.6352		1052.16		506.518	18.3299		2336.79	569.51	22.3986	5.45887
MG-5	7530000	2477000	353	17.2	28.9		0.604424	4.21629	1.63532		0.00324	0.00034106		100435	60731.5	10.8813		991.704		491.045	18.4944		2041.33	463.573	19.1187	4.34173
MG-6	7560000	2692000	391	22.8	27.8		0.776637	4.03356	1.40684		0.00419	0.000353571		76969.8	50804.2	9.96854		1077.78		495.42	20.3911		1707.65	344.683	16.0994	3.24961
MG-7	7560000	2555000	371	35	44		0.642564	4.67487	2.26815		0.0035	0.000395499		51395.3	32615	10.3685		1022.93		493.18	20.7254		1096.27	392.74	10.3791	3.71832
MG-1	5820000	1748000	247	60	97		0.730467	5.91063	8.04134		0.00391	0.000432432		22960.5	12348.8	12.2187		693.722		478.71	25.0056		397.269	66.5404	3.87848	0.649623
MG-2	6430000	1913000	271	66.7	90		0.676289	4.75875	6.65538		0.00362	0.00034452		22508	11984.7	12.3417		759.205		492.067	28.8991		385.558	49.4804	3.81231	0.48925
MG-3	6680000	2035000	288	68.8	98		0.690189	5.13615	6.86954		0.00363	0.000378462		22696	12554.1	11.8804		807.622		480.465	20.0509		403.875	47.0542	3.9077	0.455274
MG-4	6690000	2043000	309	80	111		0.626257	4.38915	7.32921		0.00357	0.000348198		19061.6	10507.5	11.9214		810.797		522.356	21.3811		338.034	57.4739	3.57519	0.607868
MG-5	6730000	2030000	290	64.4	92		0.564356	4.56057	6.31142		0.00304	0.000337349		24339	13279.6	12.0444		805.638		498.569	23.0229		427.214	53.9997	4.26461	0.539046
MG-6	7250000	2308000	315	79	103		0.717044	4.40884	6.48532		0.00368	0.000327817		21361.7	12348.8	11.3679		915.967		474.29	22.9058		397.269	53.6992	3.77853	0.510748
MG-7	6690000	2080000	295	63.3	101		0.641121	5.53028	6.91933		0.00341	0.000415375		24367.6	13763.7	11.6344		825.481		483.832	19.2936		442.79	55.1085	4.31673	0.53725
MG-8	6800000	2061000	287	70	93		0.677735	4.89057	6.54024		0.00353	0.000351515		21997.2	12178	11.8702		817.941		478.803	21.113		391.777	78.3371	3.76416	0.752656
MG-9	6800000	2121000	303	57.3	96		0.668007	4.43722	6.40988		0.00357	0.000336449		27261.8	15590.8	11.4909		841.753		494.271	21.5172		501.567	76.2926	4.96864	0.755773
MG-10	6710000	2140000	327	74	101		0.689707	3.70953	6.09174		0.00392	0.000304762		22044.7	12859.5	11.2654		849.293		531.114	26.0711		413.701	45.5739	4.39066	0.483681
MG-11	6870000	2152000	304	68	98		0.685281	6.33658	6.61856		0.00361	0.000474407		23075.5	13279.6	11.4191		854.056		476.476	24.3042		427.214	72.8996	4.088	0.697575
MG-12	6860000	2090000	305	67.2	109		0.652865	5.00639	7.22544		0.00355	0.000377473		23304.2	13082.3	11.7062		829.45		495.617	17.9553		420.869	49.7873	4.21741	0.498904
MG-1	6320000	2172000	297	92	121		0.657603	4.76992	8.33398		0.00339	0.000389024		14724.5	9262.77	10.4684		793.929		493.986	19.8772		296.457	44.6458	2.99666	0.45129																					110000	16300000	3100000
MG-2	7370000	2349000	293	10	20.6		0.816207	5.24279	1.41352		0.0038	0.000355769		165453	95996	11.3502		762.956		476.762	17.2445		3072.38	885.264	27.8639	8.0286																					220000	16200000	3000000
MG-3	7440000	2534000	302	16	25		0.736287	5.6249	1.68998		0.00325	0.000384877		103101	63611.8	10.6735		850.819		449.434	15.3451		2035.91	583.087	17.4491	4.99744																					110000	15800000	3100000
MG-4	7540000	2623000	331	15.8	21.7		0.687142	4.72158	1.30617		0.00326	0.000349914		106145	65997.2	10.5915		855.876		489.603	18.3376		2112.26	592.77	19.6539	5.51553																					130000	13800000	2300000
MG-5	4490000	1607000	216	57.2	89		0.598931	3.35068	8.24106		0.00302	0.000275986		17079.7	11092	10.1403		752.21		491.184	25.0186		355.002	58.1106	3.56435	0.583452																					77000	10100000	3000000
MG-6	7340000	2565000	315	15.3	20		0.752288	5.44698	1.32135		0.00346	0.000397213		104501	65997.2	10.4274		853.348		470.748	19.313		2112.26	662.507	18.8958	5.92664																					160000	14600000	2900000
MG-7	7540000	2685000	355	16.9	24.7		0.806768	4.40142	1.40444		0.00399	0.000351563		102549	65997.2	10.2326		917.191		510.849	21.0753		2112.26	488.163	20.5322	4.74518																					110000	12200000	3000000
MG-8	7600000	2642000	331	14.7	19.2		0.724382	4.22505	1.15531		0.00339	0.000308219		116662	72325.7	10.6222		937.418		486.05	22.5116		2314.8	544.396	21.3487	5.02078																					160000	10800000	2400000
MG-9	7550000	2720000	342	20.6	20.9		0.676019	4.85483	1.2287		0.00318	0.000371429		81463.8	52797.8	10.1609		859.669		485.228	26.8372		1689.81	446.321	15.5696	4.11232																					160000	12200000	2100000
MG-10	7640000	2770000	358	12.9	23.9		0.663377	4.2006	1.33401		0.00319	0.00033225		130067	85157.7	10.0583		947.532		498.892	18.4982		2725.5	696.65	25.851	6.60765																					76000	10400000	2000000
MG-11	7730000	2652000	347	15.4	19.1		0.742421	5.12066	1.10815		0.0036	0.000389655		109747	68568.5	10.5402		982.93		498.982	30.9427		2194.55	639.859	20.7713	6.05623																					150000	12600000	2300000
MG-12	7790000	2687000	333	19.4	17.2		0.70785	4.94066	1.06966		0.00321	0.000351603		88026.4	54997.7	10.5402		931.729		468.052	15.8929		1760.22	387.431	15.616	3.43715																					120000	11200000	2200000
MG-1	6140000	1827000	306	210	321		0.577428	4.59355	21.2504		0.00364	0.000392857		7057.35	3670.79	12.6948		736.955		486.42	17.1185		118.781	8.58127	1.37613	0.0994172																					573	41	594
MG-2	6470000	1869000	264	64.3	86		0.725713	5.56178	6.57421		0.00387	0.000390173		24244.6	12264.4	13.0532		753.897		482.519	23.7389		396.857	43.8559	3.84422	0.424817																					171	19	154
MG-3	7070000	2186000	352	203	303		0.617838	4.28759	17.7857		0.0037	0.000364941		8230.68	4521.76	12.0191		881.765		483.795	19.8127		146.318	10.0404	1.61489	0.110815																					464	32	474
MG-4	6840000	2147000	351	185	279		0.526954	4.55048	15.8694		0.00325	0.000400626		8801.59	4885.34	11.8963		866.033		508.778	19.2965		158.082	11.7199	1.79356	0.132971																					429	32	435
MG-5	6570000	2081000	357	276	433		0.48666	3.95295	24.1155		0.00313	0.000366162		5726.94	3223.13	11.7325		839.411		481.9	16.647		104.296	9.56516	1.24221	0.113925																					651	58	693
MG-6	5590000	1640000	232	48	86		0.566119	4.15303	8.04441		0.00299	0.00030303		26977.3	14683.2	12.1318		661.525		478.182	19.0151		475.126	95.9449	4.6337	0.93571																					143	29	190
MG-7	5880000	1820000	290	122	201		0.514402	5.6748	14.5858		0.00312	0.000492317		10488.6	5939.26	11.6608		734.132		502.098	23.7152		192.186	35.1854	2.11936	0.388012																					355	63	390
MG-8	7070000	2171000	321	74.9	113		0.636382	5.2481	6.95522		0.00354	0.000407725		21867.6	12179.6	11.8553		875.714		503.274	20.6618		394.113	40.9753	3.99912	0.415782																					172	18	171
MG-9	7400000	2331000	379	214	315		0.525205	4.36792	16.7576		0.00319	0.000381703		7872.02	4537.29	11.4561		940.253		496.784	18.23		146.82	9.95147	1.64364	0.111406																					462	31	453
MG-10	6870000	2110000	309	73.1	112		0.637985	4.84139	7.08772		0.0035	0.00037185		22390.9	12645.8	11.6915		851.109		497.782	20.0719		409.199	45.3992	4.11248	0.456265																					166	19	172
MG-11	6850000	2200000	318	86	110.3		0.72696	5.01143	7.04701		0.00392	0.00039499		18444.4	10944	11.1285		887.412		488.236	20.665		354.131	45.0299	3.48888	0.443631																					191	24	168
MG-12	6490000	2063000	304	74	111		0.603351	4.75971	7.47065		0.00331	0.000377179		19744.8	11566.6	11.2718		832.15		496.337	23.2717		374.278	55.4319	3.76607	0.557768																					181	27	182
MG-1	4750000	1448000	228	116	180		1.60548	3.37531	15.4814		0.0097	0.000279635		10818.1	6128.8	11.638		736.955		469.634	23.3222		182.413	22.8483	1.90004	0.237991																					8400	4670000	130000
MG-2	4940000	1495000	218	45.1	68		1.69793	3.72672	6.34052		0.0093	0.000280317		27948.8	15875.8	11.6073		753.897		469.639	21.398		472.516	85.8544	4.44148	0.807001																					8200	4660000	120000
MG-3	4930000	1470000	224	31.5	58		1.74979	2.29176	5.12718		0.01	0.000176172		39343.8	21961.5	11.8118		881.765		503.321	22.7573		653.647	105.616	6.50282	1.05072																					7700	4740000	110000
MG-4	5190000	1483000	245	107	158		1.48618	2.8969	13.1671		0.0092	0.000231429		12459.6	6671.86	12.313		866.033		497.262	25.4882		198.576	32.4921	2.13234	0.348904																					9600	4940000	200000
MG-5	5030000	1521000	221	48	62.6		1.55469	3.60647	5.68805		0.0085	0.000271673		27026.7	15502.3	11.4948		839.411		473.315	20.5159		461.398	80.3999	4.34086	0.756407																					8000	4610000	100000
MG-6	5060000	1490000	228.9	45.4	65.4		1.72037	3.00802	5.70372		0.0099	0.00022975		29411	16318.2	11.8834		661.525		500.204	17.7413		485.682	69.6488	4.83109	0.692799																					7500	4770000	130000
MG-7	5000000	1490000	225	36.6	61.1		1.63532	4.21718	5.28832		0.0092	0.000319403		35059	19740.7	11.7096		734.132		485.539	21.8228		587.548	99.5582	5.64724	0.956909																					9400	4700000	140000
MG-8	4980000	1503000	229	37.1	52.6		1.69153	2.93185	4.62898		0.0096	0.000226586		34477.2	19740.7	11.5153		875.714		499.481	27.8868		587.548	128.003	5.7701	1.25708																					9600	4620000	150000
MG-9	4980000	1574000	272	127	202		1.72763	4.0805	15.2681		0.0109	0.000366393		10219.2	6128.8	10.9937		940.253		487.373	21.1926		182.413	29.7028	1.96722	0.320326																					9300	4410000	110000
MG-10	5240000	1627000	261	129	180		1.73032	3.16921	13.9398		0.0103	0.000266291		10571.2	6304.75	11.0551		851.109		471.541	26.6911		187.65	17.6507	1.92741	0.181295																					9300	4440000	130000
MG-11	5040000	1564000	242	45.4	70.3		1.95977	4.63226	5.92922		0.0112	0.000368878		29026.4	17168.6	11.1471		887.412		486.159	19.3962		510.994	80.6838	4.95126	0.781782																					5300	4470000	120000
MG-12	4740000	1440000	217	41.1	54.7		1.91544	2.66699	4.95986		0.0107	0.000205585		29608.7	17338.1	11.2596		832.15		490.197	25.261		516.037	113.369	4.99044	1.09636																					8300	4520000	130000
MG-1	5170000	1702000	148.2	54	95		1.75029	3.55051	12.7898		0.0058	0.000176667		11652.3	6370.75	12.0733		870.499		505.864	32.7807		188.764	93.3832	2.0533	1.01578
MG-2	5060000	1701000	136.6	45	50		1.97461	4.29162	7.4639		0.00604	0.000198053		17480	9614.04	12.0017		869.987		490.618	36.0418		284.863	65.9267	2.8318	0.655372
MG-3	5190000	1775000	131	36	49.4		2.20616	3.60605	7.59511		0.00614	0.000153479		22499.9	12589.8	11.7969		907.835		448.097	28.374		373.034	63.8211	3.3902	0.580016
MG-4	5120000	1836000	153.1	33.9	54.7		1.66176	3.66447	7.25309		0.00523	0.00018618		23932.9	14063.1	11.2336		939.034		510.784	25.4636		416.687	59.1552	4.30364	0.610967
MG-5	5020000	1755000	156.4	41.1	51.9		1.99383	3.44886	6.66515		0.00669	0.000181122		20211.5	11570.5	11.5306		897.606		547.167	29.9223		342.833	58.5256	3.77063	0.643691
MG-6	5170000	1822000	140.6	34	47.2		1.92923	4.62172	6.84464		0.00557	0.000211045		24111.4	13951.8	11.4077		931.873		464.916	24.1965		413.389	76.137	3.86725	0.71226
MG-7	5020000	1755000	148	31.1	54.2		2.0687	3.2605	7.31672		0.0065	0.000160279		25899.6	14853.1	11.5101		897.606		509.615	38.1058		440.097	101.521	4.53807	1.04683
MG-8	5070000	1773000	146	30.6	50.6		1.9354	4.22438	6.98365		0.00591	0.000205164		26145.8	15238.4	11.3258		906.812		492.856	33.3615		451.511	104.184	4.48575	1.03506
MG-9	5440000	1889000	150.6	36.4	54.7		1.85426	3.62916	7.3715		0.00545	0.000166782		24032.4	13770.1	11.5204		966.141		475.822	30.7587		408.006	74.1671	3.9291	0.714229
MG-10	5340000	1823000	156.2	34.4	56		2.0687	4.39459	7.281		0.0065	0.000211028		24760.3	13915.1	11.7457		932.385		503.866	23.7409		412.301	71.2817	4.20162	0.726406
MG-11	5040000	1766000	141.9	37.2	39.7		1.91898	4.28203	5.77219		0.00578	0.000200623		21271.4	12155.7	11.5511		903.232		492.26	30.6276		360.171	76.4943	3.52799	0.749285
MG-12	5280000	1818000	145.7	38.3	51.1		1.83754	3.61575	6.91887		0.00542	0.000164948		21991.2	12500.5	11.6125		929.828		479.967	28.6008		370.389	73.7052	3.58058	0.712514
Median	5760000	1757000	264	48	68		0.677783	4.85483	6.31142		0.0038	0.000389655		24665	13824.7	11.5453		839.411		492.067	22.9058		434.747	76.4448	4.30364	0.728836
[truncated: 16 more columns]

## Sheet: PlotDat7
Source sheet	Sheet2	0.2	600.534	1	553	16	0.85	537
Plot name	Average4	15.8	600.534	2	555.5	9	1.15	537
Plot Type	15			3	579.5	8.5	1.15	569
1st free col	8			4	580	10	0.85	569
Sigma Level	2			5	595	14	0.85	537
Absolute Errs	TRUE			6	598	11	ErrBox	ErrBox
Symbol Type	1			7	604	12	1.85	546.5
Inverse Plot	FALSE			8	606	16	2.15	546.5
Color Plot	TRUE			9	608	14	2.15	564.5
3D plot	FALSE			10	610	13	1.85	564.5
Linear	FALSE			11	610.7	7.7	1.85	546.5
Data Range	B2:C16			12	616	12	ErrBox	ErrBox
Filled Symbols	TRUE			13	619	17	2.85	571
ConcAge	FALSE			14	634.2	9.2	3.15	571
ConcSwap	FALSE			15	635	9.2	3.15	588
1st Symbol-row	1			IsoLine	IsoLine	IsoLine	2.85	588
							2.85	571
							ErrBox	ErrBox
							3.85	570
							4.15	570
							4.15	590
							3.85	590
							3.85	570
							ErrBox	ErrBox
							4.85	581
							5.15	581
							5.15	609
							4.85	609
							4.85	581
							ErrBox	ErrBox
							5.85	587
							6.15	587
							6.15	609
							5.85	609
							5.85	587
							ErrBox	ErrBox
							6.85	592
							7.15	592
							7.15	616
							6.85	616
							6.85	592
							ErrBox	ErrBox
							7.85	590
							8.15	590
							8.15	622
							7.85	622
							7.85	590
							ErrBox	ErrBox
							8.85	594
							9.15	594
							9.15	622
							8.85	622
							8.85	594
							ErrBox	ErrBox
							9.85	597
							10.15	597
							10.15	623
							9.85	623
							9.85	597
							ErrBox	ErrBox
							10.85	603
							11.15	603
							11.15	618.4
							10.85	618.4
							10.85	603
							ErrBox	ErrBox
							11.85	604
							12.15	604
							12.15	628
							11.85	628
							11.85	604
							ErrBox	ErrBox
							12.85	602
							13.15	602
							13.15	636
							12.85	636
							12.85	602
							ErrBox	ErrBox
							13.85	625
							14.15	625
							14.15	643.4
							13.85	643.4
							13.85	625
							ErrBox	ErrBox
							14.85	625.8
							15.15	625.8
							15.15	644.2
							14.85	644.2
							14.85	625.8
							ErrBox	ErrBox

## Sheet: PlotDat8
Source sheet	Sheet2	0.2	489.768	1	488	14	0.85	474
Plot name	Average5	15.8	489.768	2	486.3	7.9	1.15	474
Plot Type	15			3	485.3	7.5	1.15	502
1st free col	8			4	486	8.5	0.85	502
Sigma Level	2			5	487	12	0.85	474
Absolute Errs	TRUE			6	486.1	9.1	ErrBox	ErrBox
Symbol Type	1			7	489.1	9.1	1.85	478.4
Inverse Plot	FALSE			8	496	13	2.15	478.4
Color Plot	TRUE			9	494	11	2.15	494.2
3D plot	FALSE			10	492	10	1.85	494.2
Linear	FALSE			11	491.1	5.6	1.85	478.4
Data Range	E2:F16			12	490	9.5	ErrBox	ErrBox
Filled Symbols	TRUE			13	486	14	2.85	477.8
ConcAge	FALSE			14	493.2	7.2	3.15	477.8
ConcSwap	FALSE			15	494	7.2	3.15	492.8
1st Symbol-row	1			IsoLine	IsoLine	IsoLine	2.85	492.8
							2.85	477.8
							ErrBox	ErrBox
							3.85	477.5
							4.15	477.5
							4.15	494.5
							3.85	494.5
							3.85	477.5
							ErrBox	ErrBox
							4.85	475
							5.15	475
							5.15	499
							4.85	499
							4.85	475
							ErrBox	ErrBox
							5.85	477
							6.15	477
							6.15	495.2
							5.85	495.2
							5.85	477
							ErrBox	ErrBox
							6.85	480
							7.15	480
							7.15	498.2
							6.85	498.2
							6.85	480
							ErrBox	ErrBox
							7.85	483
							8.15	483
							8.15	509
							7.85	509
							7.85	483
							ErrBox	ErrBox
							8.85	483
							9.15	483
							9.15	505
							8.85	505
							8.85	483
							ErrBox	ErrBox
							9.85	482
							10.15	482
							10.15	502
							9.85	502
							9.85	482
							ErrBox	ErrBox
							10.85	485.5
							11.15	485.5
							11.15	496.7
							10.85	496.7
							10.85	485.5
							ErrBox	ErrBox
							11.85	480.5
							12.15	480.5
							12.15	499.5
							11.85	499.5
							11.85	480.5
							ErrBox	ErrBox
							12.85	472
							13.15	472
							13.15	500
							12.85	500
							12.85	472
							ErrBox	ErrBox
							13.85	486
							14.15	486
							14.15	500.4
							13.85	500.4
							13.85	486
							ErrBox	ErrBox
							14.85	486.8
							15.15	486.8
							15.15	501.2
							14.85	501.2
							14.85	486.8
							ErrBox	ErrBox
