# Supplementary material for: In situLu–Hf geochronology with LA-ICP-MS/MS analysis
Source: Royal Society of Chemistry journal article supplement (doi:10.1039/d2ja00407k), 2023-01-01
Supplement: d2ja00407k4.xlsx [file d2ja00407k4.xlsx]

## Sheet: PlotDat6
Source sheet	BS-1	0.2	509.419	1	522.415	22.4897	0.85	499.926
Plot name	Average4	33.8	509.419	2	498.721	19.8227	1.15	499.926
Plot Type	15			3	483.265	55.7643	1.15	544.905
1st free col	8			4	520.212	32.9187	0.85	544.905
Sigma Level	2			5	515.716	26.3279	0.85	499.926
Absolute Errs	TRUE			6	507.169	14.6049	ErrBox	ErrBox
Symbol Type	1			7	521.153	25.0684	1.85	478.899
Inverse Plot	FALSE			8	536.186	22.5447	2.15	478.899
Color Plot	TRUE			9	503.774	17.0834	2.15	518.544
3D plot	FALSE			10	534.428	20.9588	1.85	518.544
Linear	FALSE			11	502.461	18.6099	1.85	478.899
Data Range	FC2:FD41			12	519.641	15.6754	ErrBox	ErrBox
Filled Symbols	TRUE			13	525.66	18.343	2.85	427.501
ConcAge	FALSE			14	505.006	16.9748	3.15	427.501
ConcSwap	FALSE			15	499.667	14.6798	3.15	539.03
1st Symbol-row	1			16	513.161	14.3328	2.85	539.03
				17	492.927	17.1545	2.85	427.501
				18	499.369	23.5214	ErrBox	ErrBox
				19	496.655	20.5191	3.85	487.293
				20	516.549	23.9609	4.15	487.293
				21	501.848	18.8865	4.15	553.131
				22	532.69	18.9516	3.85	553.131
				23	509.336	16.6502	3.85	487.293
				24	499.777	15.5415	ErrBox	ErrBox
				25	527.463	16.3793	4.85	489.388
				26	530.332	17.7013	5.15	489.388
				27	492.97	13.6047	5.15	542.044
				28	492.926	18.2837	4.85	542.044
				29	524.493	18.1413	4.85	489.388
				30	500.966	14.7905	ErrBox	ErrBox
				31	498.366	13.5484	5.85	492.564
				32	512.867	20.7129	6.15	492.564
				33	514.354	40.0153	6.15	521.774
				IsoLine	IsoLine	IsoLine	5.85	521.774
							5.85	492.564
							ErrBox	ErrBox
							6.85	496.085
							7.15	496.085
							7.15	546.221
							6.85	546.221
							6.85	496.085
							ErrBox	ErrBox
							7.85	513.641
							8.15	513.641
							8.15	558.731
							7.85	558.731
							7.85	513.641
							ErrBox	ErrBox
							8.85	486.69
							9.15	486.69
							9.15	520.857
							8.85	520.857
							8.85	486.69
							ErrBox	ErrBox
							9.85	513.469
							10.15	513.469
							10.15	555.387
							9.85	555.387
							9.85	513.469
							ErrBox	ErrBox
							10.85	483.852
							11.15	483.852
							11.15	521.071
							10.85	521.071
							10.85	483.852
							ErrBox	ErrBox
							11.85	503.965
							12.15	503.965
							12.15	535.316
							11.85	535.316
							11.85	503.965
							ErrBox	ErrBox
							12.85	507.317
							13.15	507.317
							13.15	544.003
							12.85	544.003
							12.85	507.317
							ErrBox	ErrBox
							13.85	488.031
							14.15	488.031
							14.15	521.98
							13.85	521.98
							13.85	488.031
							ErrBox	ErrBox
							14.85	484.988
							15.15	484.988
							15.15	514.347
							14.85	514.347
							14.85	484.988
							ErrBox	ErrBox
							15.85	498.828
							16.15	498.828
							16.15	527.494
							15.85	527.494
							15.85	498.828
							ErrBox	ErrBox
							16.85	475.772
							17.15	475.772
							17.15	510.082
							16.85	510.082
							16.85	475.772
							ErrBox	ErrBox
							17.85	475.848
							18.15	475.848
							18.15	522.89
							17.85	522.89
							17.85	475.848
							ErrBox	ErrBox
							18.85	476.136
							19.15	476.136
							19.15	517.174
							18.85	517.174
							18.85	476.136
							ErrBox	ErrBox
							19.85	492.588
							20.15	492.588
							20.15	540.51
							19.85	540.51
							19.85	492.588
							ErrBox	ErrBox
							20.85	482.961
							21.15	482.961
							21.15	520.734
							20.85	520.734
							20.85	482.961
							ErrBox	ErrBox
							21.85	513.738
							22.15	513.738
							22.15	551.642
							21.85	551.642
							21.85	513.738
							ErrBox	ErrBox
							22.85	492.686
							23.15	492.686
							23.15	525.987
							22.85	525.987
							22.85	492.686
							ErrBox	ErrBox
							23.85	484.236
							24.15	484.236
							24.15	515.319
							23.85	515.319
							23.85	484.236
							ErrBox	ErrBox
							24.85	511.084
							25.15	511.084
							25.15	543.842
							24.85	543.842
							24.85	511.084
							ErrBox	ErrBox
							25.85	512.631
							26.15	512.631
							26.15	548.034
							25.85	548.034
							25.85	512.631
							ErrBox	ErrBox
							26.85	479.365
							27.15	479.365
							27.15	506.575
							26.85	506.575
							26.85	479.365
							ErrBox	ErrBox
							27.85	474.642
							28.15	474.642
							28.15	511.21
							27.85	511.21
							27.85	474.642
							ErrBox	ErrBox
							28.85	506.352
							29.15	506.352
							29.15	542.635
							28.85	542.635
							28.85	506.352
							ErrBox	ErrBox
							29.85	486.175
							30.15	486.175
							30.15	515.756
							29.85	515.756
							29.85	486.175
							ErrBox	ErrBox
							30.85	484.818
							31.15	484.818
							31.15	511.915
							30.85	511.915
							30.85	484.818
							ErrBox	ErrBox
							31.85	492.154
							32.15	492.154
							32.15	533.58
							31.85	533.58
							31.85	492.154
							ErrBox	ErrBox
							32.85	474.338
							33.15	474.338
							33.15	554.369
							32.85	554.369
							32.85	474.338
							ErrBox	ErrBox

## Sheet: PlotDat7
Source sheet	BS-1	0.2	508.74	1	522.415	22.4897	0.85	499.926
Plot name	Average5	39.8	508.74	2	498.721	19.8227	1.15	499.926
Plot Type	15			3	483.265	55.7643	1.15	544.905
1st free col	8			4	520.212	32.9187	0.85	544.905
Sigma Level	2			5	515.716	26.3279	0.85	499.926
Absolute Errs	TRUE			6	507.169	14.6049	ErrBox	ErrBox
Symbol Type	1			7	521.153	25.0684	1.85	478.899
Inverse Plot	FALSE			8	536.186	22.5447	2.15	478.899
Color Plot	TRUE			9	503.774	17.0834	2.15	518.544
3D plot	FALSE			10	534.428	20.9588	1.85	518.544
Linear	FALSE			11	502.461	18.6099	1.85	478.899
Data Range	FC2:FD48			12	519.641	15.6754	ErrBox	ErrBox
Filled Symbols	TRUE			13	525.66	18.343	2.85	427.501
ConcAge	FALSE			14	505.006	16.9748	3.15	427.501
ConcSwap	FALSE			15	499.667	14.6798	3.15	539.03
1st Symbol-row	1			16	513.161	14.3328	2.85	539.03
				17	492.927	17.1545	2.85	427.501
				18	499.369	23.5214	ErrBox	ErrBox
				19	496.655	20.5191	3.85	487.293
				20	516.549	23.9609	4.15	487.293
				21	501.848	18.8865	4.15	553.131
				22	532.69	18.9516	3.85	553.131
				23	509.336	16.6502	3.85	487.293
				24	499.777	15.5415	ErrBox	ErrBox
				25	527.463	16.3793	4.85	489.388
				26	530.332	17.7013	5.15	489.388
				27	492.97	13.6047	5.15	542.044
				28	492.926	18.2837	4.85	542.044
				29	524.493	18.1413	4.85	489.388
				30	500.966	14.7905	ErrBox	ErrBox
				31	498.366	13.5484	5.85	492.564
				32	512.867	20.7129	6.15	492.564
				33	514.354	40.0153	6.15	521.774
				34	513.27	22.5434	5.85	521.774
				35	509.909	18.3596	5.85	492.564
				36	497.509	14.8581	ErrBox	ErrBox
				37	504.632	18.9632	6.85	496.085
				38	505.638	20.108	7.15	496.085
				39	506.982	14.0224	7.15	546.221
				IsoLine	IsoLine	IsoLine	6.85	546.221
							6.85	496.085
							ErrBox	ErrBox
							7.85	513.641
							8.15	513.641
							8.15	558.731
							7.85	558.731
							7.85	513.641
							ErrBox	ErrBox
							8.85	486.69
							9.15	486.69
							9.15	520.857
							8.85	520.857
							8.85	486.69
							ErrBox	ErrBox
							9.85	513.469
							10.15	513.469
							10.15	555.387
							9.85	555.387
							9.85	513.469
							ErrBox	ErrBox
							10.85	483.852
							11.15	483.852
							11.15	521.071
							10.85	521.071
							10.85	483.852
							ErrBox	ErrBox
							11.85	503.965
							12.15	503.965
							12.15	535.316
							11.85	535.316
							11.85	503.965
							ErrBox	ErrBox
							12.85	507.317
							13.15	507.317
							13.15	544.003
							12.85	544.003
							12.85	507.317
							ErrBox	ErrBox
							13.85	488.031
							14.15	488.031
							14.15	521.98
							13.85	521.98
							13.85	488.031
							ErrBox	ErrBox
							14.85	484.988
							15.15	484.988
							15.15	514.347
							14.85	514.347
							14.85	484.988
							ErrBox	ErrBox
							15.85	498.828
							16.15	498.828
							16.15	527.494
							15.85	527.494
							15.85	498.828
							ErrBox	ErrBox
							16.85	475.772
							17.15	475.772
							17.15	510.082
							16.85	510.082
							16.85	475.772
							ErrBox	ErrBox
							17.85	475.848
							18.15	475.848
							18.15	522.89
							17.85	522.89
							17.85	475.848
							ErrBox	ErrBox
							18.85	476.136
							19.15	476.136
							19.15	517.174
							18.85	517.174
							18.85	476.136
							ErrBox	ErrBox
							19.85	492.588
							20.15	492.588
							20.15	540.51
							19.85	540.51
							19.85	492.588
							ErrBox	ErrBox
							20.85	482.961
							21.15	482.961
							21.15	520.734
							20.85	520.734
							20.85	482.961
							ErrBox	ErrBox
							21.85	513.738
							22.15	513.738
							22.15	551.642
							21.85	551.642
							21.85	513.738
							ErrBox	ErrBox
							22.85	492.686
							23.15	492.686
							23.15	525.987
							22.85	525.987
							22.85	492.686
							ErrBox	ErrBox
							23.85	484.236
							24.15	484.236
							24.15	515.319
							23.85	515.319
							23.85	484.236
							ErrBox	ErrBox
							24.85	511.084
							25.15	511.084
							25.15	543.842
							24.85	543.842
							24.85	511.084
							ErrBox	ErrBox
							25.85	512.631
							26.15	512.631
							26.15	548.034
							25.85	548.034
							25.85	512.631
							ErrBox	ErrBox
							26.85	479.365
							27.15	479.365
							27.15	506.575
							26.85	506.575
							26.85	479.365
							ErrBox	ErrBox
							27.85	474.642
							28.15	474.642
							28.15	511.21
							27.85	511.21
							27.85	474.642
							ErrBox	ErrBox
							28.85	506.352
							29.15	506.352
							29.15	542.635
							28.85	542.635
							28.85	506.352
							ErrBox	ErrBox
							29.85	486.175
							30.15	486.175
							30.15	515.756
							29.85	515.756
							29.85	486.175
							ErrBox	ErrBox
							30.85	484.818
							31.15	484.818
							31.15	511.915
							30.85	511.915
							30.85	484.818
							ErrBox	ErrBox
							31.85	492.154
							32.15	492.154
							32.15	533.58
							31.85	533.58
							31.85	492.154
							ErrBox	ErrBox
							32.85	474.338
							33.15	474.338
							33.15	554.369
							32.85	554.369
							32.85	474.338
							ErrBox	ErrBox
							33.85	490.727
							34.15	490.727
							34.15	535.814
							33.85	535.814
							33.85	490.727
							ErrBox	ErrBox
							34.85	491.549
							35.15	491.549
							35.15	528.268
							34.85	528.268
							34.85	491.549
							ErrBox	ErrBox
							35.85	482.651
							36.15	482.651
							36.15	512.367
							35.85	512.367
							35.85	482.651
							ErrBox	ErrBox
							36.85	485.668
							37.15	485.668
							37.15	523.595
							36.85	523.595
							36.85	485.668
							ErrBox	ErrBox
							37.85	485.53
							38.15	485.53
							38.15	525.746
							37.85	525.746
							37.85	485.53
							ErrBox	ErrBox
							38.85	492.959
							39.15	492.959
							39.15	521.004
							38.85	521.004
							38.85	492.959
							ErrBox	ErrBox

## Sheet: PlotDat8
Source sheet	BS-1	469.809	4.85221	0	0.403847	521.776	4.85221	527.126	4.71747	615.56	4.36116	1024.92	7.77263	579.987	4.96101	436.673	4.05367	408.57	3.86216	379.099	3.71117	416.383	3.84265	315.514	3.14387	450.368	3.98869	350.288	3.35408	498.778	4.63024	692.702	5.94418	509.305	4.51995	443.048	4.03857	432.591	3.81193	485.243	4.25057	620.783	5.10352	641.912	5.54109	572.386	4.88223	366.818	3.59336
Plot name	Isochron6	474.186	4.71747	1357.2	13	520.778	4.95692	526.109	4.82022	612.49	4.65942	1019.75	8.31236	578.098	5.15857	435.855	4.13907	407.777	3.94689	378.406	3.78723	415.633	3.92016	314.955	3.20616	449.267	4.10208	349.69	3.4179	497.699	4.74479	690.869	6.1294	508.126	4.64067	441.996	4.1496	431.625	3.90968	484.127	4.36323	618.853	5.29573	640.085	5.72908	570.708	5.05365	366.176	3.66357
Plot Type	6	455.785	4.36116			517.82	5.0576	523.096	4.91902	603.398	4.94621	1004.44	8.83134	572.503	5.34855	433.434	4.22118	405.426	4.02838	376.355	3.86037	413.413	3.99469	313.3	3.26605	446.008	4.21112	347.919	3.47927	494.505	4.85495	685.44	6.3075	504.636	4.75675	438.882	4.25636	428.765	4.00368	480.824	4.47157	613.136	5.48056	634.673	5.90984	565.74	5.21849	364.276	3.73108
1st free col	85	755.881	7.77263			513.018	5.15039	518.204	5.01007	588.633	5.21052	979.582	9.30964	563.417	5.52363	429.501	4.29686	401.609	4.10347	373.025	3.92777	409.807	4.06338	310.612	3.32125	440.715	4.3116	345.042	3.53583	489.317	4.95647	676.624	6.47163	498.969	4.86373	433.825	4.35476	424.121	4.09031	475.461	4.57141	603.854	5.6509	625.886	6.07644	557.673	5.37041	361.19	3.79329
Sigma Level	2	481.665	4.96101			506.555	5.23172	511.62	5.08988	568.763	5.44219	946.123	9.72887	551.189	5.67708	424.208	4.36319	396.472	4.1693	368.543	3.98685	404.955	4.12359	306.994	3.36964	433.591	4.39968	341.171	3.5854	482.336	5.04545	664.76	6.6155	491.342	4.9575	427.019	4.441	417.871	4.16624	468.243	4.65892	591.361	5.80021	614.06	6.22246	546.815	5.50356	357.038	3.84783
Absolute Errs	TRUE	394.115	4.05367			498.68	5.29847	503.598	5.15538	544.551	5.63232	905.353	10.0729	536.29	5.80303	417.759	4.41763	390.213	4.22331	363.082	4.03534	399.042	4.173	302.586	3.40935	424.911	4.47196	336.453	3.62609	473.83	5.11847	650.303	6.73357	482.048	5.03446	418.727	4.51178	410.255	4.22855	459.448	4.73074	576.138	5.92274	599.65	6.3423	533.585	5.61284	351.978	3.89258
Symbol Type	1	367.265	3.86216			489.696	5.34807	494.445	5.20405	516.928	5.7736	858.839	10.3286	519.292	5.89661	410.401	4.45808	383.072	4.26345	356.851	4.07137	392.296	4.20972	297.557	3.43885	415.008	4.52567	331.072	3.65632	464.125	5.17274	633.81	6.82131	471.446	5.09164	409.266	4.56437	401.567	4.27486	449.413	4.7841	558.771	6.01379	583.209	6.43134	518.491	5.69404	346.205	3.92584
Inverse Plot	FALSE	343.059	3.71117			479.947	5.37861	484.514	5.23402	486.956	5.86059	808.369	10.486	500.847	5.95423	402.418	4.48299	375.323	4.28817	350.09	4.09355	384.977	4.23233	292.1	3.45702	404.263	4.55874	325.232	3.67493	453.594	5.20615	615.913	6.87533	459.941	5.12685	399	4.59676	392.139	4.30337	438.525	4.81696	539.927	6.06986	565.371	6.48618	502.114	5.74405	339.941	3.94631
Color Plot	TRUE	377.365	3.84265			469.809	5.38893	474.186	5.24414	455.785	5.88997	755.881	10.5392	481.665	5.97369	394.115	4.4914	367.265	4.29652	343.059	4.10104	377.365	4.23996	286.425	3.46316	393.089	4.56991	319.159	3.68122	442.643	5.21743	597.301	6.89357	447.976	5.13874	388.324	4.6077	382.334	4.313	427.202	4.82806	520.329	6.08879	546.819	6.50469	485.081	5.76093	333.426	3.95323
3D plot	FALSE	286.425	3.14387			459.671	5.37861	463.858	5.23402	424.614	5.86059	703.393	10.486	462.484	5.95423	385.812	4.48299	359.207	4.28817	336.028	4.09355	369.753	4.23233	280.75	3.45702	381.914	4.55874	313.086	3.67493	431.692	5.20615	578.69	6.87533	436.011	5.12685	377.648	4.59676	372.53	4.30337	415.879	4.81696	500.732	6.06986	528.267	6.48618	468.049	5.74405	326.912	3.94631
Linear	FALSE	393.089	3.98869			449.922	5.34807	453.927	5.20405	394.641	5.7736	652.923	10.3286	444.039	5.89661	377.829	4.45808	351.458	4.26345	329.267	4.07137	362.434	4.20972	275.293	3.43885	371.169	4.52567	307.246	3.65632	421.161	5.17274	560.793	6.82131	424.507	5.09164	367.382	4.56437	363.102	4.27486	404.991	4.7841	481.888	6.01379	510.428	6.43134	451.671	5.69404	320.648	3.92584
Data Range	FF2:FI48	319.159	3.35408			440.938	5.29847	444.774	5.15538	367.018	5.63232	606.408	10.0729	427.041	5.80303	370.471	4.41763	344.317	4.22331	323.036	4.03534	355.688	4.173	270.264	3.40935	361.266	4.47196	301.864	3.62609	411.456	5.11847	544.3	6.73357	413.904	5.03446	357.921	4.51178	354.413	4.22855	394.957	4.73074	464.52	5.92274	493.988	6.3423	436.577	5.61284	314.875	3.89258
Filled Symbols	TRUE	442.643	4.63024			433.063	5.23172	436.752	5.08988	342.807	5.44219	565.639	9.72887	412.142	5.67708	364.022	4.36319	338.058	4.1693	317.575	3.98685	349.775	4.12359	265.856	3.36964	352.586	4.39968	297.147	3.5854	402.95	5.04545	529.843	6.6155	404.61	4.9575	349.628	4.441	346.798	4.16624	386.162	4.65892	449.298	5.80021	479.578	6.22246	423.348	5.50356	309.815	3.84783
ConcAge	FALSE	597.301	5.94418			426.6	5.15039	430.168	5.01007	322.936	5.21052	532.18	9.30964	399.914	5.52363	358.729	4.29686	332.921	4.10347	313.093	3.92777	344.923	4.06338	262.238	3.32125	345.462	4.3116	293.276	3.53583	395.969	4.95647	517.979	6.47163	396.983	4.86373	342.823	4.35476	340.547	4.09031	378.944	4.57141	436.805	5.6509	467.752	6.07644	412.49	5.37041	305.662	3.79329
ConcSwap	FALSE	447.976	4.51995			421.798	5.0576	425.276	4.91902	308.172	4.94621	507.317	8.83134	390.828	5.34855	354.796	4.22118	329.104	4.02838	309.763	3.86037	341.317	3.99469	259.55	3.26605	340.169	4.21112	290.399	3.47927	390.781	4.85495	509.163	6.3075	391.316	4.75675	337.766	4.25636	335.903	4.00368	373.58	4.47157	427.522	5.48056	458.964	5.90984	404.422	5.21849	302.576	3.73108
1st Symbol-row	1	388.324	4.03857			418.841	4.95692	422.263	4.82022	299.079	4.65942	492.007	8.31236	385.233	5.15857	352.374	4.13907	326.754	3.94689	307.712	3.78723	339.097	3.92016	257.895	3.20616	336.91	4.10208	288.628	3.4179	387.587	4.74479	503.734	6.1294	387.826	4.64067	334.652	4.1496	333.043	3.90968	370.277	4.36323	421.806	5.29573	453.553	5.72908	399.454	5.05365	300.676	3.66357
		382.334	3.81193			417.842	4.85221	421.246	4.71747	296.009	4.36116	486.838	7.77263	383.344	4.96101	351.557	4.05367	325.96	3.86216	307.019	3.71117	338.347	3.84265	257.336	3.14387	335.809	3.98869	288.03	3.35408	386.508	4.63024	501.901	5.94418	386.647	4.51995	333.6	4.03857	332.078	3.81193	369.162	4.25057	419.876	5.10352	451.726	5.54109	397.777	4.88223	300.035	3.59336
		427.202	4.25057			418.841	4.7475	422.263	4.61472	299.079	4.06291	492.007	7.23291	385.233	4.76345	352.374	3.96827	326.754	3.77742	307.712	3.63511	339.097	3.76514	257.895	3.08157	336.91	3.8753	288.628	3.29026	387.587	4.51568	503.734	5.75896	387.826	4.39923	334.652	3.92754	333.043	3.71418	370.277	4.13791	421.806	4.9113	453.553	5.3531	399.454	4.7108	300.676	3.52316
		520.329	5.10352			421.798	4.64681	425.276	4.51592	308.172	3.77611	507.317	6.71392	390.828	4.57347	354.796	3.88616	329.104	3.69593	309.763	3.56197	341.317	3.69061	259.55	3.02168	340.169	3.76627	290.399	3.22889	390.781	4.40553	509.163	5.58086	391.316	4.28315	337.766	3.82077	335.903	3.62018	373.58	4.02958	427.522	4.72647	458.964	5.17233	404.422	4.54596	302.576	3.45565
		546.819	5.54109			426.6	4.55402	430.168	4.42486	322.936	3.5118	532.18	6.23562	399.914	4.39839	358.729	3.81048	332.921	3.62084	313.093	3.49457	344.923	3.62192	262.238	2.96648	345.462	3.66579	293.276	3.17233	395.969	4.30401	517.979	5.41672	396.983	4.17617	342.823	3.72238	340.547	3.53355	378.944	3.92974	436.805	4.55613	467.752	5.00574	412.49	4.39405	305.662	3.39343
		485.081	4.88223			433.063	4.47269	436.752	4.34505	342.807	3.28013	565.639	5.81639	412.142	4.24493	364.022	3.74415	338.058	3.55501	317.575	3.43549	349.775	3.56171	265.856	2.91809	352.586	3.57771	297.147	3.12275	402.95	4.21503	529.843	5.27285	404.61	4.0824	349.628	3.63613	346.798	3.45762	386.162	3.84223	449.298	4.40682	479.578	4.85971	423.348	4.26089	309.815	3.3389
		333.426	3.59336			440.938	4.40594	444.774	4.27955	367.018	3.09001	606.408	5.47234	427.041	4.11899	370.471	3.68971	344.317	3.501	323.036	3.387	355.688	3.5123	270.264	2.87838	361.266	3.50543	301.864	3.08207	411.456	4.142	544.3	5.15478	413.904	4.00545	357.921	3.56536	354.413	3.39531	394.957	3.77041	464.52	4.28429	493.988	4.73988	436.577	4.15162	314.875	3.29415
		280.551	2.92849			449.922	4.35634	453.927	4.23088	394.641	2.94873	652.923	5.21668	444.039	4.02541	377.829	3.64926	351.458	3.46086	329.267	3.35097	362.434	3.47558	275.293	2.84888	371.169	3.45172	307.246	3.05184	421.161	4.08774	560.793	5.06705	424.507	3.94827	367.382	3.51276	363.102	3.34901	404.991	3.71704	481.888	4.19324	510.428	4.65083	451.671	4.07041	320.648	3.26089
		513.281	5.04816			459.671	4.3258	463.858	4.20091	424.614	2.86173	703.393	5.05925	462.484	3.96779	385.812	3.62435	359.207	3.43614	336.028	3.32879	369.753	3.45297	280.75	2.83071	381.914	3.41865	313.086	3.03322	431.692	4.05433	578.69	5.01302	436.011	3.91305	377.648	3.48038	372.53	3.32049	415.879	3.68418	500.732	4.13718	528.267	4.59599	468.049	4.02041	326.912	3.24041
		319.21	3.39929			469.809	4.31549	474.186	4.19079	455.785	2.83236	755.881	5.00609	481.665	3.94833	394.115	3.61594	367.265	3.42779	343.059	3.3213	377.365	3.44534	286.425	2.82457	393.089	3.40748	319.159	3.02694	442.643	4.04304	597.301	4.99478	447.976	3.90116	388.324	3.46944	382.334	3.31086	427.202	3.67308	520.329	4.11824	546.819	4.57748	485.081	4.00353	333.426	3.2335
		360.134	3.86613			479.947	4.3258	484.514	4.20091	486.956	2.86173	808.369	5.05925	500.847	3.96779	402.418	3.62435	375.323	3.43614	350.09	3.32879	384.977	3.45297	292.1	2.83071	404.263	3.41865	325.232	3.03322	453.594	4.05433	615.913	5.01302	459.941	3.91305	399	3.48038	392.139	3.32049	438.525	3.68418	539.927	4.13718	565.371	4.59599	502.114	4.02041	339.941	3.24041
		364.381	3.64403			489.696	4.35634	494.445	4.23088	516.928	2.94873	858.839	5.21668	519.292	4.02541	410.401	3.64926	383.072	3.46086	356.851	3.35097	392.296	3.47558	297.557	2.84888	415.008	3.45172	331.072	3.05184	464.125	4.08774	633.81	5.06705	471.446	3.94827	409.266	3.51276	401.567	3.34901	449.413	3.71704	558.771	4.19324	583.209	4.65083	518.491	4.07041	346.205	3.26089
		373.182	3.71447			498.68	4.40594	503.598	4.27955	544.551	3.09001	905.353	5.47234	536.29	4.11899	417.759	3.68971	390.213	3.501	363.082	3.387	399.042	3.5123	302.586	2.87838	424.911	3.50543	336.453	3.08207	473.83	4.142	650.303	5.15478	482.048	4.00545	418.727	3.56536	410.255	3.39531	459.448	3.77041	576.138	4.28429	599.65	4.73988	533.585	4.15162	351.978	3.29415
		470.914	4.90968			506.555	4.47269	511.62	4.34505	568.763	3.28013	946.123	5.81639	551.189	4.24493	424.208	3.74415	396.472	3.55501	368.543	3.43549	404.955	3.56171	306.994	2.91809	433.591	3.57771	341.171	3.12275	482.336	4.21503	664.76	5.27285	491.342	4.0824	427.019	3.63613	417.871	3.45762	468.243	3.84223	591.361	4.40682	614.06	4.85971	546.815	4.26089	357.038	3.3389
		394.055	3.95515			513.018	4.55402	518.204	4.42486	588.633	3.5118	979.582	6.23562	563.417	4.39839	429.501	3.81048	401.609	3.62084	373.025	3.49457	409.807	3.62192	310.612	2.96648	440.715	3.66579	345.042	3.17233	489.317	4.30401	676.624	5.41672	498.969	4.17617	433.825	3.72238	424.121	3.53355	475.461	3.92974	603.854	4.55613	625.886	5.00574	557.673	4.39405	361.19	3.39343
		535.582	5.29569			517.82	4.64681	523.096	4.51592	603.398	3.77611	1004.44	6.71392	572.503	4.57347	433.434	3.88616	405.426	3.69593	376.355	3.56197	413.413	3.69061	313.3	3.02168	446.008	3.76627	347.919	3.22889	494.505	4.40553	685.44	5.58086	504.636	4.28315	438.882	3.82077	428.765	3.62018	480.824	4.02958	613.136	4.72647	634.673	5.17233	565.74	4.54596	364.276	3.45565
		505.333	5.11905			520.778	4.7475	526.109	4.61472	612.49	4.06291	1019.75	7.23291	578.098	4.76345	435.855	3.96827	407.777	3.77742	378.406	3.63511	415.633	3.76514	314.955	3.08157	449.267	3.8753	349.69	3.29026	497.699	4.51568	690.869	5.75896	508.126	4.39923	441.996	3.92754	431.625	3.71418	484.127	4.13791	618.853	4.9113	640.085	5.3531	570.708	4.7108	366.176	3.52316
		608.421	6.14931			521.776	4.85221	527.126	4.71747	615.56	4.36116	1024.92	7.77263	579.987	4.96101	436.673	4.05367	408.57	3.86216	379.099	3.71117	416.383	3.84265	315.514	3.14387	450.368	3.98869	350.288	3.35408	498.778	4.63024	692.702	5.94418	509.305	4.51995	443.048	4.03857	432.591	3.81193	485.243	4.25057	620.783	5.10352	641.912	5.54109	572.386	4.88223	366.818	3.59336
		950.751	9.4496			ErrEll	ErrEll	ErrEll	ErrEll	ErrEll	ErrEll	ErrEll	ErrEll	ErrEll	ErrEll	ErrEll	ErrEll	ErrEll	ErrEll	ErrEll	ErrEll	ErrEll	ErrEll	ErrEll	ErrEll	ErrEll	ErrEll	ErrEll	ErrEll	ErrEll	ErrEll	ErrEll	ErrEll	ErrEll	ErrEll	ErrEll	ErrEll	ErrEll	ErrEll	ErrEll	ErrEll	ErrEll	ErrEll	ErrEll	ErrEll	ErrEll	ErrEll	ErrEll	ErrEll
		867.351	8.55114
		915.538	8.78147
		882.84	8.59623
		926.982	9.04535
		932.812	9.12237
		IsoLine	IsoLine
[truncated: 34 more columns]

## Sheet: Table S3
	Table S3 A-ICP-MS data of BS-1
	Signal intensity (cps)						Contributions			Reaction rate (%)			Ratios				Concentrations (mg g-1)		Single spot Lu-Hf ages			Isochron Lu-Hf ages
Sample names	172Yb	175Lu	176Hf	177Hf	178Hf		pLu(%)	pYb(%)	f176Hf(%)	Lu	Yb		172Yb/177Hf	175Lu/177Hf	Yb/Lu		Lu		Age (Ma)	uncertainty (Ma)		_6/7_LuHf	2s	_6/7_Hf	2s
BS-1	16960000	6270000	534	103	136		1.60213	3.07448	5.14575	0.00514	0.000163663		26993.3	16607.9	10.7241		3742.8		522.415	22.4897		469.809	42.4612	4.85221	0.438541
BS-2	16100000	5680000	472	90.3	140		1.80115	3.63675	6.01663	0.00561	0.000178322		28669.2	16762.7	11.2848		3390.61		498.721	19.8227		474.186	43.256	4.71747	0.430335
BS-3	9500000	3450000	279	61	79		1.73703	3.63306	5.32676	0.0052	0.000180812		26162.7	16112.2	10.7139		2059.44		483.265	55.7643		455.785	130.549	4.36116	1.24915
BS-4	11700000	4500000	376	47	99		1.4099	3.18832	5.13308	0.0045	0.000174242		42397.8	26720.7	10.4693		2686.22		520.212	32.9187		755.881	219.829	7.77263	2.26048
BS-5	16770000	6260000	528	102	161		1.49192	3.11624	6.11089	0.00477	0.00016766		27543	17027.1	10.6732		3736.83		515.716	26.3279		481.665	80.3364	4.96101	0.827441
BS-1	18510000	6990000	581	131	221		1.71385	3.27712	7.53696	0.00535	0.000173308		22737.8	14046.5	10.6685		3908.45		507.169	14.6049		394.115	34.7734	4.05367	0.357662
BS-2	20400000	8220000	691	168	242		1.67935	3.31523	7.05659	0.00536	0.0001908		19864.5	13089.5	10.0017		4596.21		521.153	25.0684		367.265	33.7494	3.86216	0.354908
BS-3	20090000	8580000	736	189	260		1.56969	2.78523	7.02988	0.00512	0.000174468		17393.2	12226.8	9.37531		4797.5		536.186	22.5447		343.059	29.4472	3.71117	0.318556
BS-4	21980000	9510000	775	190	280		1.55869	2.88383	7.2332	0.00479	0.000172414		18843.9	13449.5	9.23387		5317.51		503.774	17.0834		377.365	31.8805	3.84265	0.324634
BS-5	22440000	9550000	846	254	366		1.58169	3.42535	8.67316	0.00527	0.000218777		14459.2	10208.4	9.3349		5339.88		534.428	20.9588		286.425	23.7683	3.14387	0.260886
BS-6	20930000	9050000	742	175	264		1.61075	3.17389	7.14983	0.00495	0.000189983		19457.2	14009.9	9.15305		5060.3		502.461	18.6099		393.089	46.8017	3.98869	0.4749
BS-1	18970000	7870000	581	162	208		1.5997	3.70168	7.27287	0.00432	0.000186749		16110.2	11110.8	9.62566		3697.56		519.641	15.6754		319.159	25.435	3.35408	0.267299
BS-2	17020000	7040000	515	104	147		1.607	3.47953	5.75627	0.00431	0.000172753		22557	15409.7	9.71772		3307.6		525.66	18.343		442.643	45.8666	4.63024	0.479784
BS-3	17450000	7250000	513	81	123		1.63854	3.65926	4.85165	0.00419	0.000176053		29989.7	20793.8	9.57451		3406.26		505.006	16.9748		597.301	77.9494	5.94418	0.775731
BS-4	16000000	6340000	451	96	163		1.37053	3.28827	7.15023	0.00353	0.000152105		23645.8	15595.3	10.0655		2978.72		499.667	14.6798		447.976	50.1103	4.51995	0.505599
BS-5	19680000	8310000	615	144	230		1.54794	2.4122	7.47465	0.00408	0.000121148		19309.8	13518.7	9.48245		3904.28		513.161	14.3328		388.324	44.7136	4.03857	0.465021
BS-6	17730000	7480000	536	131	197		1.71755	3.57763	7.31077	0.0044	0.000174482		19011.9	13310.2	9.48245		3514.32		492.927	17.1545		382.334	41.0636	3.81193	0.40941
BS-1	12120000	4430000	323	70.6	94		1.6225	4.07672	5.91577	0.0045	0.000180851		26214.5	15156.9	11.4426		2455.78		499.369	23.5214		427.202	47.4234	4.25057	0.471852
BS-2	12810000	5230000	371	68	94		1.60423	3.74308	5.07934	0.00437	0.000187602		27724.9	18461	9.93591		2899.26		496.655	20.5191		520.329	82.0784	5.10352	0.805045
BS-3	12560000	5170000	388	62.9	85		1.54011	3.93038	4.42476	0.00434	0.000205339		28778.1	19400.9	9.81374		2866		516.549	23.9609		546.819	77.6984	5.54109	0.787342
BS-4	12400000	4850000	367	71	116		1.66241	3.95609	6.52651	0.00466	0.000196155		26694.2	17210.5	10.2617		2688.61		501.848	18.8865		485.081	71.3347	4.88223	0.717967
BS-5	15800000	6810000	540	143	200		1.4477	2.70233	7.31073	0.00428	0.000155402		16637.5	11829.8	9.30473		3775.14		532.69	18.9516		333.426	27.2836	3.59336	0.294037
BS-6	14870000	6200000	485	155	205		1.69312	3.09437	8.52018	0.00488	0.000167152		14489.2	9953.81	9.6305		3436.98		509.336	16.6502		280.551	28.4064	2.92849	0.296516
BS-2	13830000	5370000	385	70.9	95		1.5127	3.52193	4.72567	0.00409	0.000166796		27660.2	17786.9	10.3158		3145.42		499.777	15.5415		513.281	73.1675	5.04816	0.719609
BS-5	14600000	6340000	470	121	176		1.48653	3.62101	7.58549	0.00409	0.000195397		17820.8	12627	9.36217		3713.58		492.97	13.6047		364.381	38.8147	3.64403	0.388171
BS-6	15240000	6640000	483	123	173		1.62248	2.76508	7.15625	0.00441	0.000147391		18231.3	12932	9.35192		3889.3		492.926	18.2837		373.182	36.6412	3.71447	0.364707
BS-1	13990000	6180000	460	89	128.3		1.56848	3.5627	5.65081	0.00438	0.000197885		22676.3	16461	9.1209		3654.22		524.493	18.1413		470.914	52.8139	4.90968	0.550629
BS-3	14490000	6610000	473	112	150		1.64483	3.66389	6.41488	0.00443	0.000202641		18416.5	13774.4	8.85234		3908.48		500.966	14.7905		394.055	41.6036	3.95515	0.417577
BS-4	13640000	6180000	436	78.1	119		1.57313	3.64472	5.49717	0.00417	0.000197196		25206.1	18721.5	8.91431		3654.22		498.366	13.5484		535.582	68.315	5.29569	0.675481
BS-5	11950000	5200000	372	69.2	94		1.40722	3.51337	5.05958	0.00381	0.000185425		24995.1	17664.2	9.36881		3074.75		512.867	20.7129		505.333	60.8163	5.11905	0.616072
BS-6	13940000	6310000	447	69	103		1.62168	2.84487	4.56582	0.00436	0.000156038		28700.5	21267.7	8.93497		3731.09		514.354	40.0153		608.421	176.321	6.14931	1.78207
Median	15800000	6340000	483	103	150		1.60213	3.47953	6.41488	0.00441	0.000176053		22737.8	15409.7	9.62566		3654.22		507.169	18.6099		442.643	45.8666	4.36116	0.471852
