# Supplementary material for: In situLu–Hf geochronology with LA-ICP-MS/MS analysis
Source: Royal Society of Chemistry journal article supplement (doi:10.1039/d2ja00407k), 2023-01-01
Supplement: d2ja00407k5.xlsx [file d2ja00407k5.xlsx]

## Sheet: PlotDat4
Source sheet	Sheet1	0.2	507.134	2	472.37	21.2054	1	452.926	21.7642	1.85	451.164
Plot name	Average1	30.8	507.134	3	472.685	21.1031	IsoLine	IsoLine	IsoLine	2.15	451.164
Plot Type	15			4	476.211	24.7893				2.15	493.575
1st free col	11			5	483.298	16.3318				1.85	493.575
Sigma Level	2			6	486.437	19.1724				1.85	451.164
Absolute Errs	TRUE			7	493.835	18.6927				ErrBox	ErrBox
Symbol Type	1			8	494.133	22.1309				2.85	451.581
Inverse Plot	FALSE			9	495.456	22.5131				3.15	451.581
Color Plot	TRUE			10	497.122	17.6031				3.15	493.788
3D plot	FALSE			11	502.497	22.9379				2.85	493.788
Linear	FALSE			12	505.9	21.832				2.85	451.581
Data Range	FC3:FD32			13	506.781	18.5991				ErrBox	ErrBox
Filled Symbols	TRUE			14	510.88	16.8953				3.85	451.422
ConcAge	FALSE			15	511.263	25.2157				4.15	451.422
ConcSwap	FALSE			16	511.645	19.361				4.15	501
1st Symbol-row	1			17	512.17	23.0111				3.85	501
				18	512.91	21.7438				3.85	451.422
				19	514.888	18.7093				ErrBox	ErrBox
				20	515.018	24.1622				4.85	466.966
				21	516.093	21.8125				5.15	466.966
				22	519.408	19.5481				5.15	499.629
				23	520.209	20.4833				4.85	499.629
				24	521.162	19.9405				4.85	466.966
				25	522.916	20.4636				ErrBox	ErrBox
				26	525.279	24.7399				5.85	467.264
				27	526.117	21.776				6.15	467.264
				28	527.233	24.6984				6.15	505.609
				29	528.285	16.999				5.85	505.609
				30	532.121	19.8972				5.85	467.264
				IsoLine	IsoLine	IsoLine	IsoLine			ErrBox	ErrBox
										6.85	475.142
										7.15	475.142
										7.15	512.527
										6.85	512.527
										6.85	475.142
										ErrBox	ErrBox
										7.85	472.002
										8.15	472.002
										8.15	516.264
										7.85	516.264
										7.85	472.002
										ErrBox	ErrBox
										8.85	472.943
										9.15	472.943
										9.15	517.97
										8.85	517.97
										8.85	472.943
										ErrBox	ErrBox
										9.85	479.519
										10.15	479.519
										10.15	514.725
										9.85	514.725
										9.85	479.519
										ErrBox	ErrBox
										10.85	479.56
										11.15	479.56
										11.15	525.435
										10.85	525.435
										10.85	479.56
										ErrBox	ErrBox
										11.85	484.068
										12.15	484.068
										12.15	527.732
										11.85	527.732
										11.85	484.068
										ErrBox	ErrBox
										12.85	488.182
										13.15	488.182
										13.15	525.38
										12.85	525.38
										12.85	488.182
										ErrBox	ErrBox
										13.85	493.984
										14.15	493.984
										14.15	527.775
										13.85	527.775
										13.85	493.984
										ErrBox	ErrBox
										14.85	486.048
										15.15	486.048
										15.15	536.479
										14.85	536.479
										14.85	486.048
										ErrBox	ErrBox
										15.85	492.284
										16.15	492.284
										16.15	531.006
										15.85	531.006
										15.85	492.284
										ErrBox	ErrBox
										16.85	489.159
										17.15	489.159
										17.15	535.181
										16.85	535.181
										16.85	489.159
										ErrBox	ErrBox
										17.85	491.166
										18.15	491.166
										18.15	534.654
										17.85	534.654
										17.85	491.166
										ErrBox	ErrBox
										18.85	496.179
										19.15	496.179
										19.15	533.598
										18.85	533.598
										18.85	496.179
										ErrBox	ErrBox
										19.85	490.856
										20.15	490.856
										20.15	539.18
										19.85	539.18
										19.85	490.856
										ErrBox	ErrBox
										20.85	494.281
										21.15	494.281
										21.15	537.906
										20.85	537.906
										20.85	494.281
										ErrBox	ErrBox
										21.85	499.86
										22.15	499.86
										22.15	538.956
										21.85	538.956
										21.85	499.86
										ErrBox	ErrBox
										22.85	499.726
										23.15	499.726
										23.15	540.693
										22.85	540.693
										22.85	499.726
										ErrBox	ErrBox
										23.85	501.222
										24.15	501.222
										24.15	541.103
										23.85	541.103
										23.85	501.222
										ErrBox	ErrBox
										24.85	502.452
										25.15	502.452
										25.15	543.379
										24.85	543.379
										24.85	502.452
										ErrBox	ErrBox
										25.85	500.539
										26.15	500.539
										26.15	550.019
										25.85	550.019
										25.85	500.539
										ErrBox	ErrBox
										26.85	504.341
										27.15	504.341
										27.15	547.893
										26.85	547.893
										26.85	504.341
										ErrBox	ErrBox
										27.85	502.535
										28.15	502.535
										28.15	551.931
										27.85	551.931
										27.85	502.535
										ErrBox	ErrBox
										28.85	511.286
										29.15	511.286
										29.15	545.284
										28.85	545.284
										28.85	511.286
										ErrBox	ErrBox
										29.85	512.224
										30.15	512.224
										30.15	552.018
										29.85	552.018
										29.85	512.224
										ErrBox	ErrBox
										0.85	431.162
										1.15	431.162
										1.15	474.69
										0.85	474.69
										0.85	431.162
										ErrBox	ErrBox

## Sheet: PlotDat5
Source sheet	Sheet1	0.2	508.577	1	510.88	16.8953	12	452.926	21.7642	0.85	493.984
Plot name	Average2	25.8	508.577	2	511.263	25.2157	IsoLine	IsoLine	IsoLine	1.15	493.984
Plot Type	15			3	493.835	18.6927				1.15	527.775
1st free col	11			4	483.298	16.3318				0.85	527.775
Sigma Level	2			5	494.133	22.1309				0.85	493.984
Absolute Errs	TRUE			6	520.209	20.4833				ErrBox	ErrBox
Symbol Type	1			7	522.916	20.4636				1.85	486.048
Inverse Plot	FALSE			8	526.117	21.776				2.15	486.048
Color Plot	TRUE			9	521.162	19.9405				2.15	536.479
3D plot	FALSE			10	528.285	16.999				1.85	536.479
Linear	FALSE			11	472.37	21.2054				1.85	486.048
Data Range	FC4:FD28			13	505.9	21.832				ErrBox	ErrBox
Filled Symbols	TRUE			14	476.211	24.7893				2.85	475.142
ConcAge	FALSE			15	472.685	21.1031				3.15	475.142
ConcSwap	FALSE			16	516.093	21.8125				3.15	512.527
1st Symbol-row	1			17	514.888	18.7093				2.85	512.527
				18	502.497	22.9379				2.85	475.142
				19	511.645	19.361				ErrBox	ErrBox
				20	532.121	19.8972				3.85	466.966
				21	512.91	21.7438				4.15	466.966
				22	525.279	24.7399				4.15	499.629
				23	515.018	24.1622				3.85	499.629
				24	527.233	24.6984				3.85	466.966
				25	512.17	23.0111				ErrBox	ErrBox
				IsoLine	IsoLine	IsoLine	IsoLine			4.85	472.002
										5.15	472.002
										5.15	516.264
										4.85	516.264
										4.85	472.002
										ErrBox	ErrBox
										5.85	499.726
										6.15	499.726
										6.15	540.693
										5.85	540.693
										5.85	499.726
										ErrBox	ErrBox
										6.85	502.452
										7.15	502.452
										7.15	543.379
										6.85	543.379
										6.85	502.452
										ErrBox	ErrBox
										7.85	504.341
										8.15	504.341
										8.15	547.893
										7.85	547.893
										7.85	504.341
										ErrBox	ErrBox
										8.85	501.222
										9.15	501.222
										9.15	541.103
										8.85	541.103
										8.85	501.222
										ErrBox	ErrBox
										9.85	511.286
										10.15	511.286
										10.15	545.284
										9.85	545.284
										9.85	511.286
										ErrBox	ErrBox
										10.85	451.164
										11.15	451.164
										11.15	493.575
										10.85	493.575
										10.85	451.164
										ErrBox	ErrBox
										12.85	484.068
										13.15	484.068
										13.15	527.732
										12.85	527.732
										12.85	484.068
										ErrBox	ErrBox
										13.85	451.422
										14.15	451.422
										14.15	501
										13.85	501
										13.85	451.422
										ErrBox	ErrBox
										14.85	451.581
										15.15	451.581
										15.15	493.788
										14.85	493.788
										14.85	451.581
										ErrBox	ErrBox
										15.85	494.281
										16.15	494.281
										16.15	537.906
										15.85	537.906
										15.85	494.281
										ErrBox	ErrBox
										16.85	496.179
										17.15	496.179
										17.15	533.598
										16.85	533.598
										16.85	496.179
										ErrBox	ErrBox
										17.85	479.56
										18.15	479.56
										18.15	525.435
										17.85	525.435
										17.85	479.56
										ErrBox	ErrBox
										18.85	492.284
										19.15	492.284
										19.15	531.006
										18.85	531.006
										18.85	492.284
										ErrBox	ErrBox
										19.85	512.224
										20.15	512.224
										20.15	552.018
										19.85	552.018
										19.85	512.224
										ErrBox	ErrBox
										20.85	491.166
										21.15	491.166
										21.15	534.654
										20.85	534.654
										20.85	491.166
										ErrBox	ErrBox
										21.85	500.539
										22.15	500.539
										22.15	550.019
										21.85	550.019
										21.85	500.539
										ErrBox	ErrBox
										22.85	490.856
										23.15	490.856
										23.15	539.18
										22.85	539.18
										22.85	490.856
										ErrBox	ErrBox
										23.85	502.535
										24.15	502.535
										24.15	551.931
										23.85	551.931
										23.85	502.535
										ErrBox	ErrBox
										24.85	489.159
										25.15	489.159
										25.15	535.181
										24.85	535.181
										24.85	489.159
										ErrBox	ErrBox
										11.85	431.162
										12.15	431.162
										12.15	474.69
										11.85	474.69
										11.85	431.162
										ErrBox	ErrBox

## Sheet: Table S4
	Table S4 A-ICP-MS data of XenoA
	Signal intensity (cps)						Contributions			Reaction rate (%)			Ratios				Concentrations (mg g-1)		Single spot Lu-Hf ages			Isochron Lu-Hf ages
Sample names	172Yb	175Lu	176Hf	177Hf	178Hf		pLu(%)	pYb(%)	f176Hf(%)	Lu	Yb		172Yb/177Hf	175Lu/177Hf	Yb/Lu		Lu		Age (Ma)	uncertainty (Ma)		_6/7_LuHf	2s	_6/7_Hf	2s
XENOA-1	12570000	4280000	381	24.3	38		1.84932	4.66831	2.02435	0.00625	0.000242818		89440	50817.3	11.6042		2090.98		510.88	16.8953		1485.81	259.702	14.5274	2.53921
XENOA-2	12070000	4330000	377	25	36.5		1.68938	3.15333	1.93268	0.00561	0.000168632		84913.3	50333.3	11.1228		2115.41		511.263	25.2157		1471.66	331.213	14.3864	3.23781
XENOA-3	12810000	4570000	389	21.7	33.1		1.8461	4.51236	1.70032	0.006	0.000234043		104532	61453.5	11.215		2232.66		493.835	18.6927		1796.8	493.729	16.9228	4.6501
XENOA-4	12860000	4470000	372	27.1	33.7		1.96212	4.40003	1.85187	0.00625	0.000218069		83060	47612.6	11.5018		2183.8		483.298	16.3318		1392.11	319.172	12.85	2.94614
XENOA-5	12430000	4410000	374	30.9	45.7		1.92262	3.82473	2.44437	0.00626	0.00019809		68937.7	40343.5	11.2662		2154.49		494.133	22.1309		1179.58	245.522	11.2012	2.33146
XENOA-6	12260000	4090000	360	26.9	30.3		1.92212	3.66562	1.70426	0.00653	0.00018648		77530.1	42621	11.9934		1998.16		520.209	20.4833		1246.17	292.293	12.3676	2.90086
XENOA-7	12310000	4180000	369	16.8	38.2		1.88321	3.19507	2.0489	0.00642	0.000165821		126103	70466.7	11.7988		2042.13		522.916	20.4636		2060.33	499.367	20.627	4.99942
XENOA-8	11840000	4060000	355	24.7	26.9		1.90199	3.94424	1.50875	0.00654	0.000208191		80966.1	45560.4	11.7169		1983.5		526.117	21.776		1332.11	292.25	13.3449	2.92773
XENOA-9	11930000	3920000	343	14.6	27.4		1.83676	3.66243	1.61215	0.00624	0.000183246		146184	78880.6	12.2187		1915.1		521.162	19.9405		2306.34	425.502	22.9099	4.22671
XENOA-10	12500000	4163000	368.2	21.4	25		1.85919	3.23527	1.36146	0.00636	0.000165449		99533.8	54484.5	12.0446		2033.82		528.285	16.999		1593.04	358.245	16.001	3.59835
XENOA-11	12880000	4580000	362	22.6	23.4		1.76674	3.90096	1.30377	0.00543	0.000190813		96596.7	56223.4	11.3277		2237.54		472.37	21.2054		1643.88	381.477	14.7468	3.42213
XENOA-12	12040000	4360000	331	18.8	24.7		1.83036	3.90867	1.54455	0.00541	0.000187523		111243	66062.5	11.1024		2130.06		452.926	21.7642		1931.56	434.508	16.6515	3.74578
XENOA-13	12850000	4400000	371	22.6	25.3		1.65884	3.71278	1.3843	0.00545	0.000187777		98005.1	55052.1	11.7374		2149.61		505.9	21.832		1609.63	396.226	15.4826	3.8112
XENOA-14	11530000	3920000	312	16.5	23.3		1.64373	4.13712	1.50891	0.00511	0.000197279		115338	64451.2	11.7988		1915.1		476.211	24.7893		1884.44	346.731	17.0785	3.14238
XENOA-15	12630000	4360000	347	21.8	33.7		1.85281	4.21742	1.95148	0.00576	0.000202749		92584.3	52326.7	11.6657		2130.06		472.685	21.1031		1529.95	330.431	13.8247	2.98579
XENOA-16	11730000	3980000	342	20	24.6		1.78998	4.46058	1.46561	0.00606	0.000231529		97502.5	54484.5	11.7988		1944.42		516.093	21.8125		1593.04	417.953	15.6463	4.105
XENOA-17	11450000	4010000	339	20.9	32.6		1.73113	3.63092	1.91927	0.00582	0.000191972		101405	58076.9	11.512		1959.07		514.888	18.7093		1698.07	542.725	16.7157	5.34256
XENOA-18	10370000	3580000	301	18.2	21.2		1.96578	4.19091	1.43071	0.00647	0.000215577		94580.8	53928.6	11.5633		1749		502.497	22.9379		1576.78	409.466	15.0712	3.91376
XENOA-19	13090000	4650000	398	20.9	29.4		1.71945	3.66905	1.47824	0.00572	0.000194278		107308	62176.5	11.3789		2271.74		511.645	19.361		1817.94	427.659	17.7027	4.16446
XENOA-20	12480000	4560000	400	22.6	32		1.70131	3.46669	1.57929	0.00588	0.000196721		104120	62176.5	11.0409		2227.77		532.121	19.8972		1817.94	466.537	18.4341	4.73074
XENOA-21	12190000	4280000	367	20.6	26.6		1.71909	5.11286	1.47462	0.00582	0.000272727		100392	57445.7	11.5223		2090.98		512.91	21.7438		1679.61	365.056	16.3958	3.56356
XENOA-22	13440000	4750000	410	22.1	28.3		1.84141	3.92941	1.40472	0.00631	0.000211371		102897	58722.2	11.553		2320.6		525.279	24.7399		1716.94	416.139	17.1544	4.15777
XENOA-23	14350000	5120000	433	24.9	29.4		1.77277	4.09478	1.37812	0.00596	0.000221984		95985.4	56223.4	11.256		2501.36		515.018	24.1622		1643.88	349.687	16.0975	3.42428
XENOA-24	13700000	4680000	405	22.6	31.4		1.73609	4.18146	1.55852	0.00599	0.000218855		104408	57445.7	11.9832		2286.4		527.233	24.6984		1679.61	398.243	16.8706	4.00009
XENOA-25	14010000	5040000	424	17.7	24.3		1.80924	4.1252	1.16659	0.00604	0.000222143		134666	78880.6	11.256		2462.28		512.17	23.0111		2306.34	550.65	22.411	5.35074
																	0
Median	12395000	4320000	364.5	21.15	27.15		1.79961	3.91904	1.49349	0.005975	0.000197		100899	57445.7	11.6145		2090.98		514.953	21.754		1679.61	403.855	16.5237	3.86248
