# Supplementary material for: In situLu–Hf geochronology with LA-ICP-MS/MS analysis
Source: Royal Society of Chemistry journal article supplement (doi:10.1039/d2ja00407k), 2023-01-01
Supplement: d2ja00407k6.xlsx [file d2ja00407k6.xlsx]

## Sheet: PlotDat5
Source sheet	Sheet1	0.2	181.647	1	180.398	10.5646	19	204.261	15.4899	0.85	169.833
Plot name	Average2	34.8	181.647	2	173.844	6.14952	28	200.384	9.46005	1.15	169.833
Plot Type	15			3	187.728	9.76664	IsoLine	IsoLine	IsoLine	1.15	190.963
1st free col	11			4	190.886	12.8863				0.85	190.963
Sigma Level	2			5	189.989	21.1633				0.85	169.833
Absolute Errs	TRUE			6	182.539	6.36992				ErrBox	ErrBox
Symbol Type	1			7	196.458	36.6954				1.85	167.695
Inverse Plot	FALSE			8	177.057	7.30333				2.15	167.695
Color Plot	TRUE			9	175.937	6.65738				2.15	179.994
3D plot	FALSE			10	180.565	6.11448				1.85	179.994
Linear	FALSE			11	185.676	10.3734				1.85	167.695
Data Range	FC2:FD36			12	190.115	7.41764				ErrBox	ErrBox
Filled Symbols	TRUE			13	187.759	10.7702				2.85	177.961
ConcAge	FALSE			14	180.731	10.1755				3.15	177.961
ConcSwap	FALSE			15	197.904	26.9802				3.15	197.494
1st Symbol-row	1			16	206.141	24.291				2.85	197.494
				17	189.053	20.0039				2.85	177.961
				18	187.726	25.2811				ErrBox	ErrBox
				20	184.688	5.62855				3.85	178
				21	179.813	4.06016				4.15	178
				22	173.257	7.77247				4.15	203.773
				23	176.032	12.6859				3.85	203.773
				24	198.263	24.9886				3.85	178
				25	191.988	11.8033				ErrBox	ErrBox
				26	176.31	6.70748				4.85	168.826
				27	191.531	8.30562				5.15	168.826
				29	188.755	7.63611				5.15	211.152
				30	194.212	13.1926				4.85	211.152
				31	177.73	11.0671				4.85	168.826
				32	177.33	11.4157				ErrBox	ErrBox
				33	179.286	8.31294				5.85	176.17
				34	178.993	6.23694				6.15	176.17
				IsoLine	IsoLine	IsoLine	IsoLine			6.15	188.909
										5.85	188.909
										5.85	176.17
										ErrBox	ErrBox
										6.85	159.762
										7.15	159.762
										7.15	233.153
										6.85	233.153
										6.85	159.762
										ErrBox	ErrBox
										7.85	169.754
										8.15	169.754
										8.15	184.361
										7.85	184.361
										7.85	169.754
										ErrBox	ErrBox
										8.85	169.28
										9.15	169.28
										9.15	182.594
										8.85	182.594
										8.85	169.28
										ErrBox	ErrBox
										9.85	174.451
										10.15	174.451
										10.15	186.68
										9.85	186.68
										9.85	174.451
										ErrBox	ErrBox
										10.85	175.303
										11.15	175.303
										11.15	196.05
										10.85	196.05
										10.85	175.303
										ErrBox	ErrBox
										11.85	182.697
										12.15	182.697
										12.15	197.532
										11.85	197.532
										11.85	182.697
										ErrBox	ErrBox
										12.85	176.989
										13.15	176.989
										13.15	198.529
										12.85	198.529
										12.85	176.989
										ErrBox	ErrBox
										13.85	170.556
										14.15	170.556
										14.15	190.907
										13.85	190.907
										13.85	170.556
										ErrBox	ErrBox
										14.85	170.923
										15.15	170.923
										15.15	224.884
										14.85	224.884
										14.85	170.923
										ErrBox	ErrBox
										15.85	181.85
										16.15	181.85
										16.15	230.432
										15.85	230.432
										15.85	181.85
										ErrBox	ErrBox
										16.85	169.049
										17.15	169.049
										17.15	209.057
										16.85	209.057
										16.85	169.049
										ErrBox	ErrBox
										17.85	162.445
										18.15	162.445
										18.15	213.007
										17.85	213.007
										17.85	162.445
										ErrBox	ErrBox
										19.85	179.06
										20.15	179.06
										20.15	190.317
										19.85	190.317
										19.85	179.06
										ErrBox	ErrBox
										20.85	175.753
										21.15	175.753
										21.15	183.873
										20.85	183.873
										20.85	175.753
										ErrBox	ErrBox
										21.85	165.484
										22.15	165.484
										22.15	181.029
										21.85	181.029
										21.85	165.484
										ErrBox	ErrBox
										22.85	163.346
										23.15	163.346
										23.15	188.718
										22.85	188.718
										22.85	163.346
										ErrBox	ErrBox
										23.85	173.274
										24.15	173.274
										24.15	223.251
										23.85	223.251
										23.85	173.274
										ErrBox	ErrBox
										24.85	180.185
										25.15	180.185
										25.15	203.791
										24.85	203.791
										24.85	180.185
										ErrBox	ErrBox
										25.85	169.602
										26.15	169.602
										26.15	183.017
										25.85	183.017
										25.85	169.602
										ErrBox	ErrBox
										26.85	183.225
										27.15	183.225
										27.15	199.837
										26.85	199.837
										26.85	183.225
										ErrBox	ErrBox
										28.85	181.119
										29.15	181.119
										29.15	196.391
										28.85	196.391
										28.85	181.119
										ErrBox	ErrBox
										29.85	181.019
										30.15	181.019
										30.15	207.404
										29.85	207.404
										29.85	181.019
										ErrBox	ErrBox
										30.85	166.663
										31.15	166.663
										31.15	188.797
										30.85	188.797
										30.85	166.663
										ErrBox	ErrBox
										31.85	165.914
										32.15	165.914
										32.15	188.746
										31.85	188.746
										31.85	165.914
										ErrBox	ErrBox
										32.85	170.973
										33.15	170.973
										33.15	187.599
										32.85	187.599
										32.85	170.973
										ErrBox	ErrBox
										33.85	172.756
										34.15	172.756
										34.15	185.23
										33.85	185.23
										33.85	172.756
										ErrBox	ErrBox
										18.85	188.771
										19.15	188.771
										19.15	219.751
										18.85	219.751
										18.85	188.771
										ErrBox	ErrBox
										27.85	190.924
										28.15	190.924
										28.15	209.844
										27.85	209.844
										27.85	190.924
										ErrBox	ErrBox

## Sheet: Table S5
	Table S5 A-ICP-MS data of M1567
	Signal intensity (cps)						Contributions			Reaction rate (%)			Ratios				Concentrations (mg g-1)		Single spot Lu-Hf ages			Isochron Lu-Hf ages
Sample names	172Yb	175Lu	176Hf	177Hf	178Hf		pLu(%)	pYb(%)	f176Hf(%)	Lu	Yb		172Yb/177Hf	175Lu/177Hf	Yb/Lu		Lu		Age (Ma)	uncertainty (Ma)		_6/7_LuHf	2s	_6/7_Hf	2s
M1567-1	9550000	5480000	513	1036	1470		2.18128	2.96865	58.0993	0.0077	0.000269033		1994.9	1957.58	6.72056		9703.33		180.398	10.5646		58.3917	4.92772	0.469819	0.0158594
M1567-2	10730000	6380000	373	384	580		4.09103	4.07673	32.4084	0.0089	0.000231867		6083.59	6203.61	6.46724		11296.9		173.844	6.14952		185.044	9.58818	0.889368	0.0184333
M1567-3	9760000	5600000	436	679	997		2.85164	2.08261	47.2299	0.0083	0.000154905		3069.4	3020.27	6.7021		9915.81		187.728	9.76664		90.09	9.53062	0.598992	0.0253469
M1567-4	9670000	5650000	408	597	910		2.73908	1.32806	42.6983	0.0074	9.34579e-05		3401.81	3409.98	6.57903		10004.3		190.886	12.8863		101.714	11.2143	0.633298	0.0279291
M1567-5	10890000	6470000	524	820	1240		2.77004	3.75712	49.1025	0.0086	0.000308605		2744.79	2811.42	6.43853		11456.3		189.989	21.1633		83.8604	18.422	0.585064	0.0514094
M1567-6	10500000	6500000	488	701	1063		2.96729	3.69645	45.651	0.0083	0.000284477		3200.13	3416.6	6.17701		11509.4		182.539	6.36992		101.912	5.15983	0.639689	0.0129551
M1567-7	10430000	6170000	990	2580	3810		1.37222	0.785399	74.7724	0.0085	0.000130101		848.225	866.471	6.45596		10925.1		196.458	36.6954		25.8455	6.63723	0.376203	0.0386442
M1567-8	10360000	6142000	367	420	628		3.90443	2.21543	34.9416	0.0088	0.000130332		5147.22	5269.67	6.4416		10875.5		177.057	7.30333		157.186	13.1675	0.799427	0.0267873
M1567-9	10770000	6420000	523	925	1376		2.70594	2.33866	53.0245	0.0083	0.000190476		2488.95	2560.79	6.40981		11367.8		175.937	6.65738		76.3844	2.74055	0.534614	0.00767244
M1567-10	11520000	6840000	675	1373	2063		2.3093	1.61866	60.7397	0.0086	0.000160333		1787.17	1835.23	6.42212		12111.5		180.565	6.11448		54.7422	2.05723	0.470515	0.00707284
M1567-11	10190000	5750000	638	1405	2080		1.85239	2.0373	64.6695	0.00788	0.00022009		1507.44	1472.28	6.75235		10181.4		185.676	10.3734		43.9157	3.30993	0.43134	0.013004
M1567-12	10870000	6520000	436	561	817		3.25241	2.15123	37.853	0.00818	0.000143713		4146.5	4297.13	6.36366		11544.8		190.115	7.41764		128.177	6.23294	0.732858	0.0142549
M1567-13	10030000	5961000	442	654	975		3.00946	2.65863	44.5475	0.0084	0.000195846		3277.33	3366.55	6.42007		10555		187.759	10.7702		100.419	10.0195	0.635474	0.0253624
M1567-14	9840000	5562000	401	573	869		2.80536	3.97592	44.3723	0.0076	0.000271186		3648.79	3571.27	6.73799		9848.53		180.731	10.1755		106.525	11.2752	0.646795	0.027384
M1567-1	37900000	22500000	2060	4760	7000		1.72344	2.17464	66.8342	0.00598	0.00019918		1261.43	1210	6.8815		3981.93		197.904	26.9802		37.1415	6.97967	0.41429	0.0311415
M1567-2	40100000	23800000	2430	5800	8600		1.52528	1.87555	70.0288	0.00607	0.00019929		1045.03	1012.97	6.80982		4211.99		206.141	24.291		31.0935	4.4025	0.399808	0.0226434
M1567-3	40700000	24100000	1780	3640	5390		2.03901	2.34629	62.0794	0.00594	0.000181228		1630.82	1578.42	6.82006		4265.09		189.053	20.0039		48.4502	8.017	0.451486	0.0298827
M1567-4	37300000	21860000	2300	5740	8400		1.48362	1.48951	73.3526	0.00602	0.000159463		980.581	939.204	6.89174		3868.66		187.726	25.2811		28.8292	5.04617	0.379609	0.0265782
M1567-5	38400000	22260000	2740	7090	10500		1.33848	1.39578	74.6175	0.00619	0.000168884		856.85	812.246	6.96342		3939.45		204.261	15.4899		24.9322	2.35883	0.375079	0.0141945
M1567-6	39200000	23030000	2096	4950	7300		1.73036	1.79436	68.8913	0.00595	0.00016305		1237.85	1190.93	6.86102		4075.72		184.688	5.62855		36.5559	1.23394	0.405633	0.00547684
M1567-7	37290000	21740000	2091	5100	7570		1.62762	1.80737	71.3456	0.00591	0.000172293		1146.39	1094.77	6.91222		3847.43		179.813	4.06016		33.6042	0.971297	0.394112	0.00455657
M1567-8	40800000	25160000	1540	2910	4260		2.51813	3.04567	55.4423	0.00579	0.000192853		2217.61	2240.56	6.53333		4452.68		173.257	7.77247		68.7747	4.12822	0.499759	0.0119993
M1567-9	40700000	24010000	1197	1790	2570		3.12308	3.6875	44.4666	0.00593	0.000182726		3495.45	3367.98	6.85078		4249.16		176.032	12.6859		103.381	13.5188	0.612428	0.0320341
M1567-10	32400000	18350000	2340	6220	9200		1.24241	1.3317	76.9838	0.00614	0.000168267		792.964	734.406	7.12727		3247.48		198.263	24.9886		22.5428	3.53537	0.362993	0.0227712
M1567-11	40100000	24400000	1878	3940	5790		2.07227	2.25453	61.7855	0.00608	0.000180437		1567.81	1564.41	6.61525		4318.18		191.988	11.8033		48.0202	4.0835	0.450945	0.0153388
M1567-12	41100000	24990000	1749	3520	5170		2.55156	2.61063	60.1606	0.00665	0.00018469		1827.31	1823.35	6.61525		4422.59		176.31	6.70748		55.9684	3.28866	0.462898	0.0108798
M1567-13	42400000	25000000	1758	3430	5030		2.29314	2.50028	57.4715	0.00606	0.000174323		1940.23	1875.08	6.8303		4424.36		191.531	8.30562		57.5561	3.68741	0.484509	0.0124163
M1567-14	39800000	24190000	1868	3710	5590		2.16858	2.32579	59.9	0.00634	0.000184848		1666.33	1657.59	6.63573		4281.01		200.384	9.46005		50.8804	3.27458	0.475295	0.0122357
M1567-15	40700000	24700000	1835	3740	5560		2.2303	2.32182	60.8874	0.0063	0.000179378		1690.57	1694.78	6.58453		4371.27		188.755	7.63611		52.0219	2.39622	0.469252	0.00864582
M1567-16	37300000	21560000	1670	3530	5110		2.14249	2.3759	60.2802	0.00613	0.000175793		1708.35	1617.04	6.97366		3815.57		194.212	13.1926		49.6356	5.29774	0.453654	0.0193679
M1567-17	32400000	18270000	1123	1940	2890		2.79487	3.12058	53.2783	0.00631	0.000177001		2631.03	2436.74	7.12727		3233.32		177.73	11.0671		74.7965	7.78414	0.531753	0.022136
M1567-18	33700000	19180000	1593	3510	5280		2.00334	2.66223	66.3178	0.00618	0.000210137		1515.26	1417.62	7.05559		3394.37		177.33	11.4157		43.5143	4.31114	0.428152	0.0169675
M1567-19	32780000	18210000	823	980	1420		3.65416	4.06871	35.4753	0.00614	0.000167499		5369.98	4896.04	7.23991		3222.71		179.286	8.31294		150.285	17.9983	0.780425	0.0373856
M1567-20	34700000	18910000	729	556	810		4.28886	5.38011	22.8356	0.00614	0.00018551		10168.4	9180.07	7.3116		3346.59		178.993	6.23694		281.785	37.1616	1.2216	0.0644415
Median	33240000	18630000	1160	2260	3350		2.30122	2.33222	58.9997	0.006305	0.000180833		1648.58	1597.73	6.87126		4396.93		186.701	10.2744		56.7623	5.103	0.472905	0.0189006
