# Supplementary material for: In situLu–Hf geochronology with LA-ICP-MS/MS analysis
Source: Royal Society of Chemistry journal article supplement (doi:10.1039/d2ja00407k), 2023-01-01
Supplement: d2ja00407k7.xlsx [file d2ja00407k7.xlsx]

## Sheet: Table S6
	Table S6 A-ICP-MS data of Otter Lake
	Signal intensity (cps)						Contributions			Reaction rate (%)			Ratios				Concentrations (mg g-1)		Single spot Lu-Hf ages			Isochron Lu-Hf ages
Sample names	172Yb	175Lu	176Hf	177Hf	178Hf		pLu(%)	pYb(%)	f176Hf(%)	Lu	Yb		172Yb/177Hf	175Lu/177Hf	Yb/Lu		Lu		Age (Ma)	uncertainty (Ma)		_6/7_LuHf	2s	_6/7_Hf	2s
Otter lake-1	190000	96600	15	2	3.1		1.30271	0	4.00217	0.0076	-		14907.8	12089.3	8.16426		6.61888		987.762	155.383		358.979	296.128	6.96349	5.74431
Otter lake-2	128000	67000	11.9	6.4	7.4		2.06429	0	14.7771	0.0127	-		3375.68	2844.55	7.85695		4.59073		918.275	187.912		84.4655	37.3433	1.71451	0.758006
Otter lake-3	287000	143500	22.5	7.2	13.6		1.01131	0	11.7898	0.0059	-		6789.88	5540.94	8.11304		9.83239		911.064	148.306		164.532	65.6634	3.20102	1.2775
Otter lake-4	284400	144400	22.3	5.8	8.6		0.702776	0	7.50394	0.0041	-		7939.09	6486.96	8.1028		9.89405		957.825	143.457		192.623	99.4727	3.75922	1.94131
Otter lake-5	317200	159400	30.3	9.7	12.8		0.562835	0	8.1523	0.004	-		5316.41	4289.76	8.20524		10.9218		1157.76	124.658		127.379	37.2856	3.03259	0.887678
Otter lake-6	253900	126600	21.8	8.3	8.6		0.981705	0.823758	7.89507	0.0063	0.000118577		4889.68	3911.25	8.27694		8.67443		1036.71	179.158		116.14	48.2162	2.46576	1.02367
Otter lake-7	294000	144600	26.2	12.7	19		0.648139	3.00736	14.2507	0.0044	0.000454545		3735.58	2955.17	8.36914		9.90776		1002.26	161.407		87.7503	28.5079	1.9339	0.628276
Otter lake-8	257000	138800	25.4	18	15		1.00076	0	11.663	0.0069	-		2452.59	2127.72	7.63159		9.51035		1076.46	280.502		63.1802	38.7299	1.45284	0.890598
Otter lake-9	268000	133300	25.5	6	13.1		0.93566	0	9.8934	0.0066	-		6510.79	5266.64	8.18475		9.1335		1123.53	156.883		156.387	68.6898	3.68154	1.61704
Otter lake-10	268000	135500	24.1	8	15.3		1.03398	2.14467	13.6508	0.0068	0.000321608		5537.92	4507.89	8.13353		9.28424		982.804	139.433		133.856	50.3235	2.87205	1.07975
Otter lake-11	276000	138000	25.4	8.6	15.6		0.551145	0	10.6936	0.0038	-		5349.6	4289.76	8.25645		9.45554		1093.02	150.828		127.379	45.5713	2.94241	1.05268
Otter lake-12	270900	138400	25.3	15.6	20		0.898557	0	15.4919	0.0061	-		2845.8	2364.14	7.96963		9.48294		1015.67	142.293		70.2002	23.9073	1.59107	0.541853
Otter lake-13	230400	114400	19.8	7.2	19		1.47494	0	17.7826	0.0097	-		5343.07	4221.67	8.37938		7.8385		952.337	151.277		125.358	52.1609	2.7364	1.13861
Otter lake-14	185600	91600	16.9	5	4.3		1.71409	0	4.49084	0.012	-		6380.33	5066.01	8.3384		6.27628		1172.04	184.455		150.429	69.3338	3.48704	1.6072
Otter lake-15	221500	114800	19.5	6.1	4.9		0.52466	0	4.92042	0.0032	-		5928.76	4925.28	7.96963		7.86591		1030.37	160.956		146.251	65.5354	2.98931	1.33952
Otter lake-16	216800	106500	19.2	4	8.3		0.972677	0	8.62664	0.0065	-		8652.21	6819.62	8.39987		7.29721		1079.47	159.703		202.501	99.4665	4.51453	2.2175
Otter lake-17	294000	150600	27.5	10.9	19.1		0.688356	0	13.6526	0.0046	-		4529.46	3719.79	8.06182		10.3189		1023.64	93.9671		110.455	31.1509	2.46954	0.696469
Otter lake-18	286100	144900	25.6	9.1	9.4		0.714664	0	7.05857	0.0047	-		5171.39	4188.43	8.1745		9.92831		1083.33	138.073		124.371	35.5449	2.7358	0.781888
Otter lake-19	229600	111200	19.2	7.2	7.1		0.896384	0	7.10576	0.0058	-		5080.42	3999.48	8.41011		7.61924		1063.6	137.403		118.76	50.4159	2.56554	1.08912
Otter lake-20	281000	146300	26	8.3	11.1		1.03253	0	7.83994	0.0069	-		5724.04	4792.17	7.90817		10.0242		1088	136.221		142.298	67.2109	3.17046	1.49749
Median	268000	136750	23.3	7.6	11.95		0.954168	0	9.26002	0.0062	0.000321608		5346.34	4289.76	8.16938		9.36989		1033.54	151.053		127.379	50.3697	2.90723	1.08444
