# Supplementary material for: In situLu–Hf geochronology with LA-ICP-MS/MS analysis
Source: Royal Society of Chemistry journal article supplement (doi:10.1039/d2ja00407k), 2023-01-01
Supplement: d2ja00407k8.xlsx [file d2ja00407k8.xlsx]

## Sheet: PlotDat6
Source sheet	Sheet1	0.2	1147.38	1	1371.64	209.904	5	706.85	125.626	0.85	1161.74
Plot name	Average1	20.8	1147.38	2	1464.5	255.859	IsoLine	IsoLine	IsoLine	1.15	1161.74
Plot Type	15			3	916.377	330.393				1.15	1581.54
1st free col	11			4	1544.84	280.816				0.85	1581.54
Sigma Level	2			6	1186.96	231.724				0.85	1161.74
Absolute Errs	TRUE			7	1412.89	337.881				ErrBox	ErrBox
Symbol Type	1			8	1126.37	200.169				1.85	1208.64
Inverse Plot	FALSE			9	1141.06	200.268				2.15	1208.64
Color Plot	TRUE			10	1173.8	229.138				2.15	1720.36
3D plot	FALSE			11	881.94	177.782				1.85	1720.36
Linear	FALSE			12	1091.63	187.67				1.85	1208.64
Data Range	FC2:FD21			13	1568.26	318.395				ErrBox	ErrBox
Filled Symbols	TRUE			14	1034.92	157.229				2.85	585.985
ConcAge	FALSE			15	1104.18	192.936				3.15	585.985
ConcSwap	FALSE			16	1159.18	191.599				3.15	1246.77
1st Symbol-row	1			17	1147.42	180.617				2.85	1246.77
				18	1156.49	203.917				2.85	585.985
				19	1303.46	251.063				ErrBox	ErrBox
				20	872.104	195.247				3.85	1264.03
				IsoLine	IsoLine	IsoLine	IsoLine			4.15	1264.03
										4.15	1825.66
										3.85	1825.66
										3.85	1264.03
										ErrBox	ErrBox
										5.85	955.24
										6.15	955.24
										6.15	1418.69
										5.85	1418.69
										5.85	955.24
										ErrBox	ErrBox
										6.85	1075
										7.15	1075
										7.15	1750.77
										6.85	1750.77
										6.85	1075
										ErrBox	ErrBox
										7.85	926.2
										8.15	926.2
										8.15	1326.54
										7.85	1326.54
										7.85	926.2
										ErrBox	ErrBox
										8.85	940.793
										9.15	940.793
										9.15	1341.33
										8.85	1341.33
										8.85	940.793
										ErrBox	ErrBox
										9.85	944.659
										10.15	944.659
										10.15	1402.94
										9.85	1402.94
										9.85	944.659
										ErrBox	ErrBox
										10.85	704.158
										11.15	704.158
										11.15	1059.72
										10.85	1059.72
										10.85	704.158
										ErrBox	ErrBox
										11.85	903.965
										12.15	903.965
										12.15	1279.3
										11.85	1279.3
										11.85	903.965
										ErrBox	ErrBox
										12.85	1249.87
										13.15	1249.87
										13.15	1886.66
										12.85	1886.66
										12.85	1249.87
										ErrBox	ErrBox
										13.85	877.687
										14.15	877.687
										14.15	1192.15
										13.85	1192.15
										13.85	877.687
										ErrBox	ErrBox
										14.85	911.24
										15.15	911.24
										15.15	1297.11
										14.85	1297.11
										14.85	911.24
										ErrBox	ErrBox
										15.85	967.585
										16.15	967.585
										16.15	1350.78
										15.85	1350.78
										15.85	967.585
										ErrBox	ErrBox
										16.85	966.808
										17.15	966.808
										17.15	1328.04
										16.85	1328.04
										16.85	966.808
										ErrBox	ErrBox
										17.85	952.574
										18.15	952.574
										18.15	1360.41
										17.85	1360.41
										17.85	952.574
										ErrBox	ErrBox
										18.85	1052.4
										19.15	1052.4
										19.15	1554.53
										18.85	1554.53
										18.85	1052.4
										ErrBox	ErrBox
										19.85	676.857
										20.15	676.857
										20.15	1067.35
										19.85	1067.35
										19.85	676.857
										ErrBox	ErrBox
										4.85	581.224
										5.15	581.224
										5.15	832.476
										4.85	832.476
										4.85	581.224
										ErrBox	ErrBox

## Sheet: Table S7
	Table S7 A-ICP-MS data of NW-1
	Signal intensity (cps)						Contributions			Reaction rate (%)			Ratios				Concentrations (mg g-1)		Single spot Lu-Hf ages			Isochron Lu-Hf ages
Sample names	172Yb	175Lu	176Hf	177Hf	178Hf		pLu(%)	pYb(%)	f176Hf(%)	Lu	Yb		172Yb/177Hf	175Lu/177Hf	Yb/Lu		Lu		Age (Ma)	uncertainty (Ma)		_6/7_LuHf	2s	_6/7_Hf	2s
NW-1-1	125700	55000	16.2	27	30		0.354553	0	36.0543	0.004	-		581.866	416.588	9.22347		4.45703		1371.64	209.904		11.8919	5.47221	0.482502	0.22203
NW-1-2	117800	52900	18	22	41.1		0.305504	0	41.1429	0.004	-		813.642	601.212	8.93683		4.28686		1464.5	255.859		17.1621	4.47754	0.808533	0.210944
NW-1-3	110700	46300	12.6	28	33		0.40048	0	51.9477	0.004	-		615.125	413.333	9.82744		3.75201		916.377	330.393		11.799	5.57944	0.423636	0.200327
NW-1-4	87000	35200	13	19.1	28.9		0.28209	0	42.6387	0.004	-		691.581	448.361	10.1857		2.8525		1544.84	280.816		12.7989	3.1694	0.653176	0.161747
NW-1-5	116300	50400	10.9	23.7	31.1		0.486117	0	55.0668	0.004	-		750.33	523.828	9.45891		4.08426		706.85	125.626		14.9531	3.09008	0.441925	0.0913241
NW-1-6	117800	52700	15.3	32	40.9		0.582226	0	47.3014	0.0069	-		577.345	416.588	9.15181		4.27065		1186.96	231.724		11.8919	2.73611	0.50569	0.11635
NW-1-7	128000	52700	15	21.7	26.8		0.171561	0	32.9948	0.0019	-		897.469	608.122	9.74555		4.27065		1412.89	337.881		17.3594	4.08132	0.692688	0.162856
NW-1-8	135500	59500	14.8	17.6	30.3		0.413329	0	38.9018	0.004	-		1208.74	867.322	9.20299		4.8217		1126.37	200.169		24.7585	6.2688	0.861195	0.218053
NW-1-9	127700	55400	16.9	34.9	41.8		0.44391	0	47.8392	0.0051	-		570.388	400.808	9.39749		4.48945		1141.06	200.268		11.4414	2.71366	0.472319	0.112024
NW-1-10	133600	55300	15.6	22.1	36.8		0.360113	2.11484	44.713	0.0041	0.000443548		951.002	629.841	9.97076		4.48134		1173.8	229.138		17.9794	4.37804	0.72058	0.175464
NW-1-11	118400	48600	12.2	22.3	33.7		0.114277	0	52.1674	0.0011	-		842.852	562.836	9.88886		3.9384		881.94	177.782		16.0667	3.35339	0.557542	0.116369
NW-1-12	128300	52100	12.6	17.9	24		0.0988115	0	37.3054	0.0009	-		1087.56	724.748	9.90934		4.22203		1091.63	187.67		20.6886	5.2645	0.679437	0.172892
NW-1-13	91000	39500	13.6	14.7	23.7		0.234465	0	33.2573	0.0029	-		927.497	653.168	9.37702		3.20096		1568.26	318.395		18.6453	5.76532	0.83039	0.256766
NW-1-14	134100	57100	14	16.9	31.1		0.106758	0	42.2338	0.001	-		1261.17	867.322	9.60223		4.62721		1034.92	157.229		24.7585	7.37008	0.83613	0.248898
NW-1-15	120400	51800	13.2	14.4	27.7		0.578661	0	40.0196	0.0056	-		1376.39	961.939	9.44868		4.19772		1104.18	192.936		27.4594	7.08592	0.953558	0.246066
NW-1-16	118700	49200	16.5	24.6	41.7		0.171943	0	50.2807	0.0021	-		743.515	494.454	9.92981		3.98702		1159.18	191.599		14.1146	3.85454	0.621111	0.169618
NW-1-17	126700	53200	15.8	32.3	38.5		0.59188	0	47.4667	0.0068	-		598.534	403.867	9.7865		4.31117		1147.42	180.617		11.5288	2.75525	0.475217	0.113572
NW-1-18	89000	38000	10.6	19.4	24.1		0.559829	0	45.0849	0.0062	-		738.923	499.119	9.77626		3.07941		1156.49	203.917		14.2478	4.20816	0.566316	0.167264
NW-1-19	122400	51800	13	15.4	21.5		0.172891	0	30.453	0.0017	-		1239.36	839.788	9.74555		4.19772		1303.46	251.063		23.9725	6.19478	0.849279	0.219464
NW-1-20	99300	41600	10.5	22.9	27.7		0.114894	0	52.4497	0.0011	-		623.723	426.666	9.65342		3.37114		872.104	195.247		12.1796	3.48512	0.420378	0.120289
Median	119550	51950	13.8	22.05	30.7		0.330029	0	43.6758	0.004	0.000443548		781.986	543.332	9.69948		4.20987		1151.96	202.092		15.5099	4.2931	0.637144	0.171255
