# Supplementary material for: In situLu–Hf geochronology with LA-ICP-MS/MS analysis
Source: Royal Society of Chemistry journal article supplement (doi:10.1039/d2ja00407k), 2023-01-01
Supplement: d2ja00407k9.xlsx [file d2ja00407k9.xlsx]

## Sheet: PlotDat5
Source sheet	Sheet1	0.2	865.421	1	969.009	129.174	0.85	839.835
Plot name	Average2	33.8	865.421	2	865.561	107.376	1.15	839.835
Plot Type	15			3	841.609	119.669	1.15	1098.18
1st free col	8			4	825.055	152.82	0.85	1098.18
Sigma Level	2			5	812.686	120.934	0.85	839.835
Absolute Errs	TRUE			6	757.728	144.138	ErrBox	ErrBox
Symbol Type	1			7	839.877	132.359	1.85	758.186
Inverse Plot	FALSE			8	827.494	114.302	2.15	758.186
Color Plot	TRUE			9	903.886	139.027	2.15	972.937
3D plot	FALSE			10	908.89	126.22	1.85	972.937
Linear	FALSE			11	936.294	186.079	1.85	758.186
Data Range	FC4:FD42			12	898.759	132.954	ErrBox	ErrBox
Filled Symbols	TRUE			13	879.796	154.65	2.85	721.94
ConcAge	FALSE			14	756.807	205.192	3.15	721.94
ConcSwap	FALSE			15	886.953	187.986	3.15	961.278
1st Symbol-row	1			16	797.154	167.29	2.85	961.278
				17	900.577	191.931	2.85	721.94
				18	707.272	172.746	ErrBox	ErrBox
				19	787.326	172.575	3.85	672.235
				20	947.483	227.513	4.15	672.235
				21	847.373	209.055	4.15	977.875
				22	764.767	196.949	3.85	977.875
				23	717.581	141.378	3.85	672.235
				24	937.693	182.831	ErrBox	ErrBox
				25	867.946	203.922	4.85	691.752
				26	888.048	167.305	5.15	691.752
				27	982.46	229.035	5.15	933.62
				28	803.799	180.501	4.85	933.62
				29	1107.05	224.205	4.85	691.752
				30	1075.33	332.793	ErrBox	ErrBox
				31	1067.4	198.249	5.85	613.591
				32	1007.79	203.628	6.15	613.591
				33	948.135	177.675	6.15	901.866
				IsoLine	IsoLine	IsoLine	5.85	901.866
							5.85	613.591
							ErrBox	ErrBox
							6.85	707.518
							7.15	707.518
							7.15	972.236
							6.85	972.236
							6.85	707.518
							ErrBox	ErrBox
							7.85	713.192
							8.15	713.192
							8.15	941.797
							7.85	941.797
							7.85	713.192
							ErrBox	ErrBox
							8.85	764.859
							9.15	764.859
							9.15	1042.91
							8.85	1042.91
							8.85	764.859
							ErrBox	ErrBox
							9.85	782.671
							10.15	782.671
							10.15	1035.11
							9.85	1035.11
							9.85	782.671
							ErrBox	ErrBox
							10.85	750.215
							11.15	750.215
							11.15	1122.37
							10.85	1122.37
							10.85	750.215
							ErrBox	ErrBox
							11.85	765.805
							12.15	765.805
							12.15	1031.71
							11.85	1031.71
							11.85	765.805
							ErrBox	ErrBox
							12.85	725.147
							13.15	725.147
							13.15	1034.45
							12.85	1034.45
							12.85	725.147
							ErrBox	ErrBox
							13.85	551.615
							14.15	551.615
							14.15	962
							13.85	962
							13.85	551.615
							ErrBox	ErrBox
							14.85	698.967
							15.15	698.967
							15.15	1074.94
							14.85	1074.94
							14.85	698.967
							ErrBox	ErrBox
							15.85	629.864
							16.15	629.864
							16.15	964.444
							15.85	964.444
							15.85	629.864
							ErrBox	ErrBox
							16.85	708.646
							17.15	708.646
							17.15	1092.51
							16.85	1092.51
							16.85	708.646
							ErrBox	ErrBox
							17.85	534.527
							18.15	534.527
							18.15	880.018
							17.85	880.018
							17.85	534.527
							ErrBox	ErrBox
							18.85	614.751
							19.15	614.751
							19.15	959.902
							18.85	959.902
							18.85	614.751
							ErrBox	ErrBox
							19.85	719.97
							20.15	719.97
							20.15	1175
							19.85	1175
							19.85	719.97
							ErrBox	ErrBox
							20.85	638.318
							21.15	638.318
							21.15	1056.43
							20.85	1056.43
							20.85	638.318
							ErrBox	ErrBox
							21.85	567.818
							22.15	567.818
							22.15	961.716
							21.85	961.716
							21.85	567.818
							ErrBox	ErrBox
							22.85	576.203
							23.15	576.203
							23.15	858.959
							22.85	858.959
							22.85	576.203
							ErrBox	ErrBox
							23.85	754.862
							24.15	754.862
							24.15	1120.52
							23.85	1120.52
							23.85	754.862
							ErrBox	ErrBox
							24.85	664.024
							25.15	664.024
							25.15	1071.87
							24.85	1071.87
							24.85	664.024
							ErrBox	ErrBox
							25.85	720.743
							26.15	720.743
							26.15	1055.35
							25.85	1055.35
							25.85	720.743
							ErrBox	ErrBox
							26.85	753.425
							27.15	753.425
							27.15	1211.49
							26.85	1211.49
							26.85	753.425
							ErrBox	ErrBox
							27.85	623.298
							28.15	623.298
							28.15	984.301
							27.85	984.301
							27.85	623.298
							ErrBox	ErrBox
							28.85	882.84
							29.15	882.84
							29.15	1331.25
							28.85	1331.25
							28.85	882.84
							ErrBox	ErrBox
							29.85	742.538
							30.15	742.538
							30.15	1408.12
							29.85	1408.12
							29.85	742.538
							ErrBox	ErrBox
							30.85	869.154
							31.15	869.154
							31.15	1265.65
							30.85	1265.65
							30.85	869.154
							ErrBox	ErrBox
							31.85	804.159
							32.15	804.159
							32.15	1211.42
							31.85	1211.42
							31.85	804.159
							ErrBox	ErrBox
							32.85	770.46
							33.15	770.46
							33.15	1125.81
							32.85	1125.81
							32.85	770.46
							ErrBox	ErrBox

## Sheet: PlotDat4
Source sheet	Sheet1	0.2	866.143	1	969.009	129.174	0.85	839.835
Plot name	Average1	38.8	866.143	2	865.561	107.376	1.15	839.835
Plot Type	15			3	805.087	107.376	1.15	1098.18
1st free col	8			4	841.609	119.669	0.85	1098.18
Sigma Level	2			5	825.055	152.82	0.85	839.835
Absolute Errs	TRUE			6	812.686	120.934	ErrBox	ErrBox
Symbol Type	1			7	757.728	144.138	1.85	758.186
Inverse Plot	FALSE			8	820.508	144.138	2.15	758.186
Color Plot	TRUE			9	982.139	144.138	2.15	972.937
3D plot	FALSE			10	863.611	132.359	1.85	972.937
Linear	FALSE			11	839.877	132.359	1.85	758.186
Data Range	FC4:FD42			12	827.494	114.302	ErrBox	ErrBox
Filled Symbols	TRUE			13	903.886	139.027	2.85	697.712
ConcAge	FALSE			14	908.89	126.22	3.15	697.712
ConcSwap	FALSE			15	936.294	186.079	3.15	912.463
1st Symbol-row	1			16	898.759	132.954	2.85	912.463
				17	879.796	154.65	2.85	697.712
				18	937.71	154.65	ErrBox	ErrBox
				19	756.807	205.192	3.85	721.94
				20	886.953	187.986	4.15	721.94
				21	797.154	167.29	4.15	961.278
				22	900.577	191.931	3.85	961.278
				23	707.272	172.746	3.85	721.94
				24	787.326	172.575	ErrBox	ErrBox
				25	947.483	227.513	4.85	672.235
				26	847.373	209.055	5.15	672.235
				27	764.767	196.949	5.15	977.875
				28	717.581	141.378	4.85	977.875
				29	937.693	182.831	4.85	672.235
				30	867.946	203.922	ErrBox	ErrBox
				31	888.048	167.305	5.85	691.752
				32	982.46	229.035	6.15	691.752
				33	803.799	180.501	6.15	933.62
				34	1107.05	224.205	5.85	933.62
				35	1075.33	332.793	5.85	691.752
				36	1067.4	198.249	ErrBox	ErrBox
				37	1007.79	203.628	6.85	613.591
				38	948.135	177.675	7.15	613.591
				IsoLine	IsoLine	IsoLine	7.15	901.866
							6.85	901.866
							6.85	613.591
							ErrBox	ErrBox
							7.85	676.37
							8.15	676.37
							8.15	964.646
							7.85	964.646
							7.85	676.37
							ErrBox	ErrBox
							8.85	838.001
							9.15	838.001
							9.15	1126.28
							8.85	1126.28
							8.85	838.001
							ErrBox	ErrBox
							9.85	731.252
							10.15	731.252
							10.15	995.969
							9.85	995.969
							9.85	731.252
							ErrBox	ErrBox
							10.85	707.518
							11.15	707.518
							11.15	972.236
							10.85	972.236
							10.85	707.518
							ErrBox	ErrBox
							11.85	713.192
							12.15	713.192
							12.15	941.797
							11.85	941.797
							11.85	713.192
							ErrBox	ErrBox
							12.85	764.859
							13.15	764.859
							13.15	1042.91
							12.85	1042.91
							12.85	764.859
							ErrBox	ErrBox
							13.85	782.671
							14.15	782.671
							14.15	1035.11
							13.85	1035.11
							13.85	782.671
							ErrBox	ErrBox
							14.85	750.215
							15.15	750.215
							15.15	1122.37
							14.85	1122.37
							14.85	750.215
							ErrBox	ErrBox
							15.85	765.805
							16.15	765.805
							16.15	1031.71
							15.85	1031.71
							15.85	765.805
							ErrBox	ErrBox
							16.85	725.147
							17.15	725.147
							17.15	1034.45
							16.85	1034.45
							16.85	725.147
							ErrBox	ErrBox
							17.85	783.061
							18.15	783.061
							18.15	1092.36
							17.85	1092.36
							17.85	783.061
							ErrBox	ErrBox
							18.85	551.615
							19.15	551.615
							19.15	962
							18.85	962
							18.85	551.615
							ErrBox	ErrBox
							19.85	698.967
							20.15	698.967
							20.15	1074.94
							19.85	1074.94
							19.85	698.967
							ErrBox	ErrBox
							20.85	629.864
							21.15	629.864
							21.15	964.444
							20.85	964.444
							20.85	629.864
							ErrBox	ErrBox
							21.85	708.646
							22.15	708.646
							22.15	1092.51
							21.85	1092.51
							21.85	708.646
							ErrBox	ErrBox
							22.85	534.527
							23.15	534.527
							23.15	880.018
							22.85	880.018
							22.85	534.527
							ErrBox	ErrBox
							23.85	614.751
							24.15	614.751
							24.15	959.902
							23.85	959.902
							23.85	614.751
							ErrBox	ErrBox
							24.85	719.97
							25.15	719.97
							25.15	1175
							24.85	1175
							24.85	719.97
							ErrBox	ErrBox
							25.85	638.318
							26.15	638.318
							26.15	1056.43
							25.85	1056.43
							25.85	638.318
							ErrBox	ErrBox
							26.85	567.818
							27.15	567.818
							27.15	961.716
							26.85	961.716
							26.85	567.818
							ErrBox	ErrBox
							27.85	576.203
							28.15	576.203
							28.15	858.959
							27.85	858.959
							27.85	576.203
							ErrBox	ErrBox
							28.85	754.862
							29.15	754.862
							29.15	1120.52
							28.85	1120.52
							28.85	754.862
							ErrBox	ErrBox
							29.85	664.024
							30.15	664.024
							30.15	1071.87
							29.85	1071.87
							29.85	664.024
							ErrBox	ErrBox
							30.85	720.743
							31.15	720.743
							31.15	1055.35
							30.85	1055.35
							30.85	720.743
							ErrBox	ErrBox
							31.85	753.425
							32.15	753.425
							32.15	1211.49
							31.85	1211.49
							31.85	753.425
							ErrBox	ErrBox
							32.85	623.298
							33.15	623.298
							33.15	984.301
							32.85	984.301
							32.85	623.298
							ErrBox	ErrBox
							33.85	882.84
							34.15	882.84
							34.15	1331.25
							33.85	1331.25
							33.85	882.84
							ErrBox	ErrBox
							34.85	742.538
							35.15	742.538
							35.15	1408.12
							34.85	1408.12
							34.85	742.538
							ErrBox	ErrBox
							35.85	869.154
							36.15	869.154
							36.15	1265.65
							35.85	1265.65
							35.85	869.154
							ErrBox	ErrBox
							36.85	804.159
							37.15	804.159
							37.15	1211.42
							36.85	1211.42
							36.85	804.159
							ErrBox	ErrBox
							37.85	770.46
							38.15	770.46
							38.15	1125.81
							37.85	1125.81
							37.85	770.46
							ErrBox	ErrBox

## Sheet: Table S8
	Table S8 A-ICP-MS data of MAP-3
	Signal intensity (cps)						Contributions			Reaction rate (%)			Ratios				Concentrations (mg g-1)		Single spot Lu-Hf ages			Isochron Lu-Hf ages
Sample names	172Yb	175Lu	176Hf	177Hf	178Hf		pLu(%)	pYb(%)	f176Hf(%)	Lu	Yb		172Yb/177Hf	175Lu/177Hf	Yb/Lu		Lu		Age (Ma)	uncertainty (Ma)		_6/7_LuHf	2s	_6/7_Hf	2s
MAP-3-1	220700	123000	31	140	138		1.05588	0	84.4062	0.0098	-		296.697	265.965	7.38574		5.39377		257.917	106.451		7.89753	10.3513	0.244332	0.320246
MAP-3-2	207000	124300	23.3	15	14.3		0.928677	0	11.2322	0.0066	-		2368.85	2312.74	6.78136		5.45077		1115.33	140.504		68.6742	48.1667	1.62895	1.14251
MAP-3-3	204000	129300	20.1	5.7	7.1		0.993253	0.778799	7.09056	0.0059	0.000132325		6048.21	6185.24	6.47404		5.67003		969.009	129.174		183.663	159.337	3.61053	3.13231
MAP-3-4	213700	133500	18.1	3.1	2.9		1.23736	0.780724	3.04424	0.0063	0.00011208		10973.5	11081.9	6.55599		5.85421		865.561	107.376		329.064	235.006	5.53096	3.95002
MAP-3-5	206500	123100	15.4	0	0		0.544699	5.28344	0	0.0026	0.000676471		69647.7	66491.3	6.93501		5.39815		805.087	107.376		1974.38	3981.28	29.908	60.3086
MAP-3-6	210200	128500	16.3	4.9	1.4		0.725191	0	1.85827	0.0035	-		6008.01	5910.34	6.73014		5.63495		841.609	119.669		175.501	216.267	2.83282	3.49085
MAP-3-7	200600	122400	15.3	2.9	1.2		0.360151	0	2.00443	0.0017	-		10847.3	10638.6	6.75062		5.36746		825.055	152.82		315.901	254.802	5.00535	4.03725
MAP-3-8	219600	136800	16.7	0.29	0.59		0.953585	0	0.676137	0.0044	-		121395	120893	6.64819		5.99892		812.686	120.934		3589.79	7238.69	55.2697	111.45
MAP-3-9	203800	126600	14	2.6	2		1.29486	0	2.65183	0.0057	-		13332.9	13298.3	6.63794		5.55163		757.728	144.138		394.876	318.502	5.78016	4.6622
MAP-3-10	218800	137600	17.3	0.86	1.4		1.03599	0	1.75445	0.005	-		40707.6	40917.7	6.58673		6.034		839.877	132.359		1215	1338.09	19.5505	21.531
MAP-3-11	231300	144100	18.1	0.86	1.8		1.5084	0	1.67105	0.0072	-		48034.2	48357.3	6.57648		6.31904		827.494	114.302		1435.91	2132.12	22.7421	33.7687
MAP-3-12	259200	160200	22.4	6	4.1		0.961603	0	3.78897	0.0051	-		7251.43	7188.25	6.67892		7.02505		903.886	139.027		213.447	145.408	3.77706	2.57308
MAP-3-13	201000	124000	17.6	1.7	1.4		0.821405	2.66848	1.72186	0.0044	0.000396583		17336.4	17159	6.68916		5.43762		908.89	126.22		509.518	596.57	8.87591	10.3924
MAP-3-14	209300	128000	19.5	2.3	6.6		0.674627	2.50695	6.4555	0.0039	0.000400729		14614.1	14376.5	6.73014		5.61303		936.294	186.079		426.893	767.755	8.05082	14.4792
MAP-3-15	214700	129100	17.9	1.1	1.2		1.13515	0.891334	1.33692	0.0059	0.000125598		34309.5	33245.7	6.83257		5.66126		898.759	132.954		987.191	1157.06	16.9372	19.8516
MAP-3-16	207800	122200	16.1	0.59	1.4		0.734351	0	1.67548	0.0037	-		25326.4	24178.7	6.93501		5.35869		879.796	154.65		717.957	987.094	12.0971	16.6319
MAP-3-17	210500	127700	18.5	0.29	0		1.11244	0	0	0.0059	-		123265	120893	6.75062		5.59987		937.71	154.65		3589.79	7238.69	63.4265	127.897
MAP-3-1	90100	51830	7.9	0.87	1.1		0	0	2.45528	-	-		21786.6	22288	6.5076		5.81364		756.807	205.192		619.776	757.932	9.03766	11.0523
MAP-3-2	90600	53490	9.2	0	0		0	0	-0.160562	-	-		21267.1	22288	6.35241		5.99984		886.953	187.986		619.776	757.932	10.3288	12.6312
MAP-3-3	91700	53790	8.5	1.06	0		0	0	-0.184522	-	-		21371	22288	6.38345		6.03349		797.154	167.29		619.776	568.449	9.27241	8.50451
MAP-3-4	89400	52390	9.3	0	0.87		0	0	1.64017	-	-		21301.7	22288	6.36275		5.87646		900.577	191.931		619.776	757.932	10.6809	13.0618
MAP-3-5	91800	53200	7.3	0.43	0		0	0	-0.226157	-	-		21613.5	22288	6.45587		5.96731		707.272	172.746		619.776	378.966	8.21606	5.02376
MAP-3-6	93200	53720	8.2	0	0		0	0	-0.208064	-	-		21717.4	22288	6.4869		6.02564		787.326	172.575		619.776	757.932	9.15503	11.1958
MAP-3-7	91200	52890	10.2	0	1.7		0	0	2.87227	-	-		21578.8	22288	6.44552		5.93254		947.483	227.513		619.776	757.932	11.3851	13.923
MAP-3-8	89900	53260	8.7	0	0		0	0	-0.207654	-	-		21059.3	22288	6.29033		5.97404		847.373	209.055		619.776	757.932	9.85927	12.057
MAP-3-9	90800	52520	7.8	0.22	0.65		0	0	1.42148	-	-		21648.1	22288	6.46621		5.89104		764.767	196.949		619.776	299.383	9.03766	4.36565
MAP-3-10	92500	52560	7.2	0.43	0		0	0	-0.265156	-	-		21935.6	22288	6.55208		5.89552		717.581	141.378		619.776	454.759	8.33343	6.11463
MAP-3-11	85300	49110	8.8	0	0		0	0	-0.248652	-	-		21717.4	22288	6.4869		5.50855		937.693	182.831		619.776	454.759	10.9156	8.00931
MAP-3-12	87700	49450	8.2	0.22	0		0	0	-0.274329	-	-		22098.4	22288	6.60071		5.54668		867.946	203.922		619.776	322.121	10.094	5.24624
MAP-3-13	83100	47710	8	0	0		0	0	-0.285281	-	-		21821.3	22288	6.51794		5.35151		888.048	167.305		619.776	322.121	10.3288	5.36824
MAP-3-14	81800	47340	8.9	0.65	2.6		0	0	5.12008	-	-		21474.9	22288	6.41448		5.31001		982.46	229.035		619.776	606.345	12.0893	11.8274
MAP-3-15	83400	48340	7.8	0	0.22		0	0	0.236321	-	-		21613.5	22288	6.45587		5.42218		803.799	180.501		619.776	606.345	9.38978	9.1863
MAP-3-16	87900	49990	10.5	0	0		0	0	-0.234014	-	-		21959.8	22288	6.55933		5.60725		1107.05	224.205		619.776	606.345	12.9109	12.6312
MAP-3-17	85400	49270	10.3	0.22	7		0	0	10.7795	-	-		21682.7	22288	6.47656		5.52649		1075.33	332.793		619.776	352.438	14.0847	8.00931
MAP-3-18	86900	50540	10.2	0	0		0	0	-0.251669	-	-		21474.9	22288	6.41448		5.66895		1067.4	198.249		619.776	352.438	12.4415	7.07489
MAP-3-19	87400	50880	9.7	0	0		0	0	-0.271246	-	-		21544.2	22288	6.43517		5.70708		1007.79	203.628		619.776	352.438	11.7372	6.67442
MAP-3-20	86800	50520	9	0	0		0	0	-0.29724	-	-		21440.3	22288	6.40414		5.6667		948.135	177.675		619.776	352.438	11.033	6.27396
Median	92500	53720	10.3	0.43	0.87		0	0	1.42148	0.0051	0.000264454		21578.8	22288	6.55208		5.6667		879.796	167.305		619.776	568.449	10.094	8.50451
