# Supplementary material for: In situLu–Hf geochronology with LA-ICP-MS/MS analysis
Source: Royal Society of Chemistry journal article supplement (doi:10.1039/d2ja00407k), 2023-01-01
Supplement: d2ja00407k10.xlsx [file d2ja00407k10.xlsx]

## Sheet: PlotDat6
Source sheet	Sheet1	0.2	1147.38	1	1371.64	209.904	5	706.85	125.626	0.85	1161.74
Plot name	Average1	20.8	1147.38	2	1464.5	255.859	IsoLine	IsoLine	IsoLine	1.15	1161.74
Plot Type	15			3	916.377	330.393				1.15	1581.54
1st free col	11			4	1544.84	280.816				0.85	1581.54
Sigma Level	2			6	1186.96	231.724				0.85	1161.74
Absolute Errs	TRUE			7	1412.89	337.881				ErrBox	ErrBox
Symbol Type	1			8	1126.37	200.169				1.85	1208.64
Inverse Plot	FALSE			9	1141.06	200.268				2.15	1208.64
Color Plot	TRUE			10	1173.8	229.138				2.15	1720.36
3D plot	FALSE			11	881.94	177.782				1.85	1720.36
Linear	FALSE			12	1091.63	187.67				1.85	1208.64
Data Range	FC2:FD21			13	1568.26	318.395				ErrBox	ErrBox
Filled Symbols	TRUE			14	1034.92	157.229				2.85	585.985
ConcAge	FALSE			15	1104.18	192.936				3.15	585.985
ConcSwap	FALSE			16	1159.18	191.599				3.15	1246.77
1st Symbol-row	1			17	1147.42	180.617				2.85	1246.77
				18	1156.49	203.917				2.85	585.985
				19	1303.46	251.063				ErrBox	ErrBox
				20	872.104	195.247				3.85	1264.03
				IsoLine	IsoLine	IsoLine	IsoLine			4.15	1264.03
										4.15	1825.66
										3.85	1825.66
										3.85	1264.03
										ErrBox	ErrBox
										5.85	955.24
										6.15	955.24
										6.15	1418.69
										5.85	1418.69
										5.85	955.24
										ErrBox	ErrBox
										6.85	1075
										7.15	1075
										7.15	1750.77
										6.85	1750.77
										6.85	1075
										ErrBox	ErrBox
										7.85	926.2
										8.15	926.2
										8.15	1326.54
										7.85	1326.54
										7.85	926.2
										ErrBox	ErrBox
										8.85	940.793
										9.15	940.793
										9.15	1341.33
										8.85	1341.33
										8.85	940.793
										ErrBox	ErrBox
										9.85	944.659
										10.15	944.659
										10.15	1402.94
										9.85	1402.94
										9.85	944.659
										ErrBox	ErrBox
										10.85	704.158
										11.15	704.158
										11.15	1059.72
										10.85	1059.72
										10.85	704.158
										ErrBox	ErrBox
										11.85	903.965
										12.15	903.965
										12.15	1279.3
										11.85	1279.3
										11.85	903.965
										ErrBox	ErrBox
										12.85	1249.87
										13.15	1249.87
										13.15	1886.66
										12.85	1886.66
										12.85	1249.87
										ErrBox	ErrBox
										13.85	877.687
										14.15	877.687
										14.15	1192.15
										13.85	1192.15
										13.85	877.687
										ErrBox	ErrBox
										14.85	911.24
										15.15	911.24
										15.15	1297.11
										14.85	1297.11
										14.85	911.24
										ErrBox	ErrBox
										15.85	967.585
										16.15	967.585
										16.15	1350.78
										15.85	1350.78
										15.85	967.585
										ErrBox	ErrBox
										16.85	966.808
										17.15	966.808
										17.15	1328.04
										16.85	1328.04
										16.85	966.808
										ErrBox	ErrBox
										17.85	952.574
										18.15	952.574
										18.15	1360.41
										17.85	1360.41
										17.85	952.574
										ErrBox	ErrBox
										18.85	1052.4
										19.15	1052.4
										19.15	1554.53
										18.85	1554.53
										18.85	1052.4
										ErrBox	ErrBox
										19.85	676.857
										20.15	676.857
										20.15	1067.35
										19.85	1067.35
										19.85	676.857
										ErrBox	ErrBox
										4.85	581.224
										5.15	581.224
										5.15	832.476
										4.85	832.476
										4.85	581.224
										ErrBox	ErrBox

## Sheet: Table S9
	Table S9 A-ICP-MS data of 14SA36
	Signal intensity (cps)						Contributions			Reaction rate (%)			Ratios				Concentrations (mg g-1)		Single spot Lu-Hf ages			Isochron Lu-Hf ages
Sample names	172Yb	175Lu	176Hf	177Hf	178Hf		pLu(%)	pYb(%)	f176Hf(%)	Lu	Yb		172Yb/177Hf	175Lu/177Hf	Yb/Lu		Lu		Age (Ma)	uncertainty (Ma)		_6/7_LuHf	2s	_6/7_Hf	2s
14SA36-1	34800	23900	44	73	114		0	0	64.8992	-	-		114.108	135.537	5.55911		0.714113		2854.43	403.713		4.38577	0.591996	0.70487	0.0928235
14SA36-2	36200	23300	49	74	110		0	0	42.8967	-	-		105.633	117.465	5.93791		0.696185		4869.14	937.891		3.801	0.698743	0.6559	0.117634
14SA36-3	32800	17000	102	310	450		0	0	82.8685	-	-		23.5782	20.3305	7.65785		0.507946		4324.11	583.181		0.657866	0.0846766	0.333886	0.0419276
14SA36-4	34400	20400	226	750	1290		0	0	94.2084	-	-		9.97135	9.78878	6.72622		0.609535		2826.76	371.242		0.31675	0.0397013	0.305444	0.0373504
14SA36-5	39400	25900	36.1	50	95		0	0	43.506	-	-		201.605	223.035	5.96862		0.773871		3086.59	333.529		7.2171	0.74428	0.781415	0.0786198
14SA36-6	31300	19400	43	59	101		0.0283353	0	48.0202	-	-		131.55	135.537	6.40885		0.579656		3826.11	618.447		4.38577	0.676567	0.64533	0.097123
14SA36-7	39900	25000	235	790	1200		0	0	109.144	-	-		12.0647	12.2929	6.48051		0.74698		4020.3	478.876		0.39778	0.0452196	0.275909	0.0306003
14SA36-8	42100	26500	113	358	516		0.0215111	0	89.5694	-	-		28.2508	31.0938	5.99933		0.791799		1727.62	72.0712		1.00615	0.0400585	0.325043	0.0126255
14SA36-9	62800	40600	146	490	720		0	0	79.226	-	-		32.2212	36.2051	5.87648		1.2131		3222.53	486.992		1.17154	0.168967	0.360719	0.0507562
14SA36-10	45900	28600	64	220	330		0	0	35.1873	-	-		63.7318	69.5518	6.05052		0.854545		6877.94	1961.09		2.25059	0.612429	0.494971	0.131406
14SA36-11	51600	30100	40.5	76	87		0.0239194	0	40.3788	-	-		160.436	160.18	6.6136		0.899364		3240.63	352.084		5.18319	0.537444	0.55931	0.0565803
14SA36-12	48000	29200	970	3380	4900		0	0	95.4379	-	-		3.47338	3.59588	6.37813		0.872472		5631.6	422.631		0.116357	0.0083338	0.293305	0.0204949
14SA36-13	42600	20900	51	130	149		0	0	59.1722	-	-		76.9589	64.4627	7.88308		0.624475		4164.28	420.179		2.08592	0.200868	0.426994	0.0401155
14SA36-14	50900	32500	432	1460	2140		0	0	94.4701	-	-		8.44006	9.27358	6.00957		0.971074		2840.63	168.86		0.300079	0.0170243	0.304598	0.0168591
14SA36-15	44100	21600	204	670	1000		0	0	94.9221	-	-		15.2719	12.8925	7.82166		0.645391		1933.25	180.205		0.417183	0.0371128	0.310541	0.0269521
14SA36-16	39300	20900	28.1	46	46.9		0	0	32.2297	-	-		213.379	188.784	7.46334		0.624475		3533.68	422.646		6.10876	0.697305	0.634542	0.0706654
14SA36-17	56500	34600	2200	7900	11600		0.000516512	0	99.4428	-	-		1.97679	2.11438	6.17338		1.03382		1215.53	191.565		0.0684181	0.0102906	0.289366	0.0424613
14SA36-18	32700	16300	279	1011	1430		0	0	98.3955	-	-		7.74954	6.69106	7.64762		0.487031		1065.86	44.1207		0.216513	0.0085535	0.278379	0.0107293
14SA36-19	58100	35500	480	1630	2250		0	0	87.644	-	-		8.72249	9.43918	6.10171		1.06071		6012.39	719.114		0.305438	0.0348653	0.30487	0.0339516
14SA36-20	39800	26200	261	810	1210		0	0	85.8819	-	-		12.2503	13.9104	5.81505		0.782835		5174.32	488.203		0.450119	0.0405316	0.335057	0.0294349
14SA36-21	37300	23200	530	1870	2660		0	0	96.459	-	-		4.95016	5.28594	6.18361		0.693197		3025.09	274.129		0.171045	0.0147927	0.289368	0.0244154
14SA36-22	39500	22800	250	750	1250		0	0	90.402	-	-		13.093	12.8925	6.70574		0.681246		3584.2	551.084		0.417183	0.061217	0.310541	0.044457
14SA36-23	39600	25900	440	1560	2380		0.00376247	0	101.996	-	-		5.9681	6.77685	5.81505		0.773871		3502.4	371.518		0.219289	0.0221998	0.289357	0.0285788
14SA36-24	44200	27400	690	2370	3530		0	0	97.6007	-	-		4.64419	5.03423	6.09147		0.81869		2234.26	167.673		0.1629	0.0116673	0.297635	0.0207975
14SA36-25	35300	21400	31.7	44.9	72		0.0373511	0	42.2034	-	-		182.157	186.782	6.43956		0.639415		3249.03	208.072		6.044	0.369407	0.674598	0.0402255
14SA36-26	32800	21300	55.8	125	188		0	0	66.2948	-	-		61.9774	69.2784	5.90719		0.636427		3355.89	136.899		2.24175	0.0872766	0.443722	0.0168539
14SA36-27	33600	20500	158	500	770		0.0299153	0	99.472	-	-		18.2732	19.5776	6.16314		0.612523		144.561	18.3526		0.633501	0.0767559	0.332138	0.0392608
14SA36-28	41800	28300	95	298	425		0	0	83.2068	-	-		33.7355	40.9763	5.43626		0.845581		2131.1	123.668		1.32593	0.0734335	0.329745	0.0178167
14SA36-29	69400	46000	44.1	31.1	48.9		0	0	20.6784	-	-		525.092	614.644	5.64101		1.37444		2904.42	172.979		19.889	1.13049	1.44011	0.0798593
14SA36-30	46700	32000	580	1980	3040		0	0	99.4422	-	-		5.78124	7.14316	5.34412		0.956134		378.395	28.2053		0.231142	0.0164431	0.301099	0.0208973
14SA36-31	66700	39500	900	3500	5200		0.00132893	0	96.6291	-	-		4.93345	5.18229	6.28599		1.18023		3051.53	365.4		0.167691	0.0191638	0.300711	0.0335272
14SA36-32	37400	22600	830	2800	4300		0	0	96.8924	-	-		3.36076	3.54761	6.25528		0.67527		4089.99	648.898		0.114795	0.017382	0.302962	0.0447547
14SA36-33	46900	29100	37	51	86		0.122151	0	44.953	-	-		245.449	271.074	5.97886		0.869484		2674.12	226.927		8.77155	0.710395	0.840365	0.0663999
14SA36-34	57100	38400	121	342	484		0	0	75.6321	-	-		40.1803	46.7782	5.67173		1.14736		2958.39	195.984		1.51367	0.095701	0.36363	0.0224295
14SA36-35	24400	15200	169	690	1030		0	0	87.3151	-	-		6.3339	6.52585	6.40885		0.454164		8343.78	1461.07		0.211167	0.0352901	0.29294	0.0477619
14SA36-36	28500	15700	340	1290	1960		0	0	97.7128	-	-		5.00598	4.76211	6.94121		0.469103		2267.05	313.829		0.154095	0.0203582	0.299795	0.0386413
14SA36-37	60900	34400	683	2320	3370		0	0	94.0515	-	-		6.32628	6.34567	6.58289		1.02784		4338.46	158.005		0.205336	0.00713708	0.301179	0.010213
14SA36-38	28000	13800	897	3140	4640		0	0	99.7147	-	-		1.68866	1.45218	7.67833		0.412333		911.86	59.2199		0.0469904	0.00291252	0.290163	0.0175459
14SA36-39	39900	22000	1130	3900	5800		0	0	98.1222	-	-		2.43285	2.38105	6.74669		0.657342		3601.05	287.593		0.0770474	0.00587255	0.294582	0.0219054
14SA36-40	43700	27500	163	440	730		0	0	80.6587	-	-		22.1362	25.9115	5.64101		0.821678		4390.28	339.165		0.838457	0.0618187	0.382987	0.0275485
14SA36-41	231200	142000	119.1	26	30.9		0.0661913	-0.00729874	4.90128	-	-		1944.7	2131.16	5.99658		4.17444		3047.6	396.755		68.561	8.51845	4.35118	0.527432
14SA36-42	9800	6170	8.5	10	14.9		0	-0.00729874	39.4892	-	-		200.715	203.28	6.48861		0.181382		3512.69	854.589		6.53966	1.51842	0.755897	0.171228
14SA36-43	189400	125300	100.3	26.5	34.2		0.0264165	-0.00729874	6.63886	-	-		1633.8	1928.93	5.56606		3.6835		2863.23	523.286		62.0552	10.8238	3.76083	0.639973
14SA36-44	142700	84500	840	2850	4100		0.0015049	-0.00729874	93.2104	-	-		10.9325	11.4897	6.25285		2.48409		2745.57	393.273		0.369633	0.0505303	0.294972	0.0393403
14SA36-45	17000	10700	13.9	16	17.7		0	-0.00729874	22.7442	-	-		247.326	278.172	5.84282		0.314553		4123.32	757.861		8.94901	1.56977	0.95783	0.163918
14SA36-46	13700	8750	13.5	21.7	36.9		0	-0.00729874	48.976	-	-		162.763	169.944	6.29385		0.257228		3358.4	462.493		5.46724	0.718556	0.71523	0.0917094
14SA36-47	36300	23900	25.9	19.1	28		0	-0.0346254	21.8841	-	-		414.479	484.887	5.61731		0.7026		3164.65	439.995		15.5992	2.06987	1.25322	0.162235
14SA36-48	29100	14400	125	411	578		0	-0.00730139	88.2005	-	-		16.8364	13.9453	7.93394		0.423324		4116.63	221.863		0.448631	0.0230755	0.313858	0.0157496
14SA36-49	23800	12100	238	796	1207		0	-0.00376926	99.5614	-	-		6.04031	5.23294	7.58542		0.35571		399.412	39.0851		0.168348	0.0157223	0.294425	0.0268263
14SA36-50	7790	4300	8	17.3	21.6		0	-0.00376926	35.6667	-	-		141.877	122.913	7.58542		0.126409		4968.36	1294.24		3.95421	0.983059	0.61849	0.150013
14SA36-51	11600	7800	19.7	50	71		0	-0.00376926	69.6574	-	-		62.5765	63.6779	6.45786		0.2293		3120.83	297.298		2.04857	0.186249	0.417623	0.0370427
14SA36-52	9700	4890	45	166	237		0	-0.0182983	92.7231	-	-		12.6834	10.6989	7.79043		0.143754		3093.43	268.192		0.344193	0.0284792	0.289919	0.0234034
14SA36-53	23000	11000	108	376	549		0	-0.00772454	94.9726	-	-		14.0526	12.012	7.68793		0.323372		1989.98	116.22		0.386435	0.0215391	0.299219	0.0162711
14SA36-54	18900	9750	73	248	346		0	-0.0109888	89.1897	-	-		17.2207	15.144	7.47267		0.286625		3370.65	254.547		0.487195	0.0351137	0.301966	0.0212328
14SA36-55	18200	12900	11.6	10.8	27		0	-0.0109888	43.7799	-	-		377.498	463.62	5.3508		0.379228		2192.18	380.112		14.915	2.46819	1.14034	0.184106
14SA36-56	9100	6100	9.2	6.8	14.1		0	-0.0109888	18.8278	-	-		335.264	352.351	6.25285		0.179325		5674.53	1605.52		11.3354	2.32853	1.025	0.324322
14SA36-57	10400	6970	1420	5000	7600		0	-0.000597156	103.847	-	-		0.499914	0.562263	5.84282		0.2049		3270.5	550.196		0.0180884	0.00290418	0.285628	0.0447403
14SA36-58	19700	14400	31.1	63	78		0	-0.0263279	55.7418	-	-		75.8172	94.3798	5.27904		0.423324		3763.99	752.885		3.03627	0.579616	0.515667	0.0960385
14SA36-59	62100	39600	900	3150	4660		0	-0.000916427	99.5642	-	-		4.63634	5.23294	5.82232		1.16414		389.155	27.9263		0.168348	0.0115297	0.2887	0.0192901
14SA36-60	10000	9500	9.2	13.1	17.7		0	-0.000916427	38.8882	-	-		168.81	251.679	4.40774		0.279276		2326.76	642.442		8.09672	2.13359	0.605399	0.15564
14SA36-61	107500	71400	59.4	17.7	21.1		0.151212	0.606671	6.48695	-	-		1263.64	1505.77	5.51481		2.09898		3039.78	427.973		48.4419	6.50901	3.11817	0.40876
14SA36-62	115800	78100	68.8	25.1	31.4		0.106628	-0.0113494	8.56376	-	-		1002.42	1201.2	5.48405		2.29594		3114.7	438.44		38.6435	5.19147	2.60891	0.34194
14SA36-63	95200	57000	60.8	55	83		0.135441	-0.013092	25.2399	-	-		404.715	436.799	6.08884		1.67566		3010.18	786.807		14.0522	3.50541	1.12001	0.272581
14SA36-64	130800	85400	71.5	22.2	32.8		0.163902	-0.0108728	8.77196	-	-		1359.92	1596.76	5.59681		2.51055		2924.98	349.354		51.3689	5.85549	3.25703	0.36221
14SA36-65	151900	96400	105.3	104	149		0.338885	-0.007321	26.8715	-	-		345.265	397.389	5.70957		2.83392		3043.42	361.86		12.7843	1.45069	1.0536	0.116641
14SA36-66	124500	79200	67	38.9	51		0.0434308	-0.0113109	13.6291	-	-		734	852.463	5.65831		2.32828		2820.51	329.722		27.4244	3.05969	1.76887	0.192536
14SA36-67	119700	82300	385	1160	1680		0	-0.00222645	88.4415	-	-		24.9266	31.0898	5.26879		2.41941		1888.36	241.529		1.00018	0.122091	0.319273	0.0380226
14SA36-68	130500	95000	137	239	330		0	-0.00568496	46.4611	-	-		128.45	170.493	4.95103		2.79276		2897.1	431.042		5.48488	0.77883	0.586741	0.0812827
14SA36-69	160800	101700	88	37	60		0.100958	0.907597	12.9207	-	-		991.437	1139.07	5.71982		2.98972		2937.85	312.891		36.6447	3.72472	2.44522	0.24248
14SA36-70	95600	63200	61.7	30	40		0	-0.0121267	11.7387	-	-		725.76	866.437	5.50456		1.85792		3326.73	395.275		27.874	3.16083	2.08739	0.230931
14SA36-71	40300	23900	43.3	86	143		0	-0.0160985	54.2995	-	-		112.608	120.12	6.16059		0.7026		3433.13	565.522		3.86435	0.607512	0.577488	0.0885723
14SA36-72	83800	57400	53.1	23.3	41.1		0.0711857	-0.014294	14.4379	-	-		874.229	1101.1	5.21754		1.68742		3035.72	379.212		35.4232	4.22305	2.4886	0.289448
14SA36-73	38000	23800	349	1160	1630		0	-0.00215815	92.0203	-	-		7.38114	8.25823	5.87358		0.69966		4442.55	594.587		0.265674	0.0339353	0.297726	0.0371018
Median	39900	23900	105.3	248	346		0	0	79.226	-	-		33.7355	40.9763	6.08884		0.714113		3047.6	433.675		1.32593	0.095701	0.36363	0.0424613
